# Supplementary material for: Divergent synthesis of two types of indolizines from pyridine-2-acetonitrile, (hetero)arylglyoxal, and TMSCN
Source: Royal Society of Chemistry journal article supplement (doi:10.1039/d3ob00471f), 2023-01-01

## Electronic Supplementary Information

### Divergent Synthesis of Two Types of Indolizines from Pyridine-2- acetonitrile, (Hetero)arylglyoxal, and TMSCN

Seonghyeon Nam,<sup>‡</sup> Sunhee Lee,<sup>‡</sup> Woojin Kim,<sup>‡</sup> and Ikyon Kim\*

College of Pharmacy and Yonsei Institute of Pharmaceutical Sciences, Yonsei University  
85 Songdogwahak-ro, Yeonsu-gu, Incheon, 21983, Republic of Korea

\* Corresponding author. Tel.: +82 32 749 4515; fax: +82 32 749 4105; e-mail:  
[ikyonkim@yonsei.ac.kr](mailto:ikyonkim@yonsei.ac.kr)

<sup>‡</sup> These authors contributed equally.

## **Table of Contents**

|                                                                    |               |
|--------------------------------------------------------------------|---------------|
| Copies of $^1\text{H}$ and $^{13}\text{C}$ NMR spectra of <b>7</b> | <b>S3-14</b>  |
| Copies of $^1\text{H}$ and $^{13}\text{C}$ NMR spectra of <b>8</b> | <b>S15-36</b> |
| Copies of $^1\text{H}$ and $^{13}\text{C}$ NMR spectra of <b>5</b> | <b>S37-58</b> |
| Copies of $^1\text{H}$ and $^{13}\text{C}$ NMR spectra of <b>6</b> | <b>S59-66</b> |

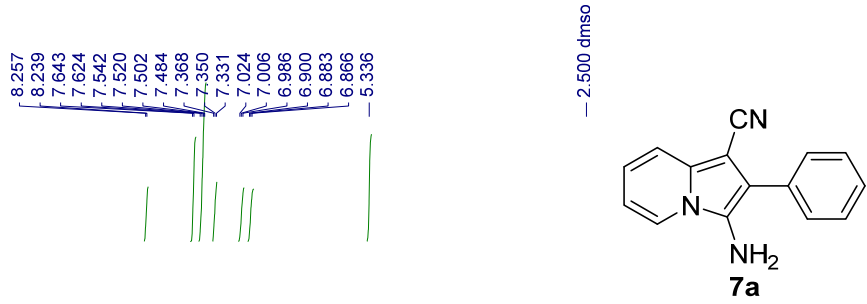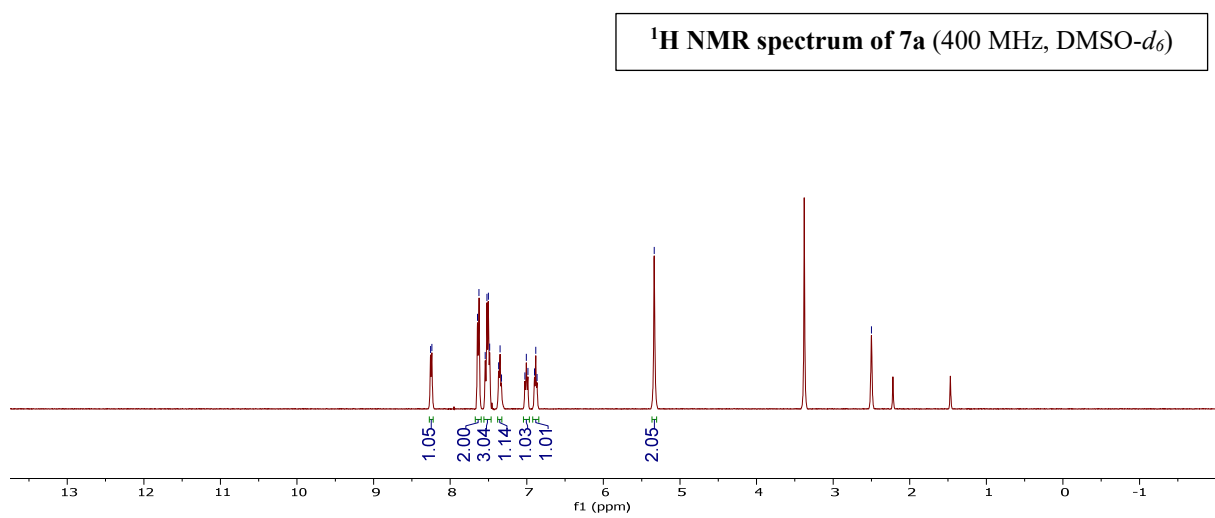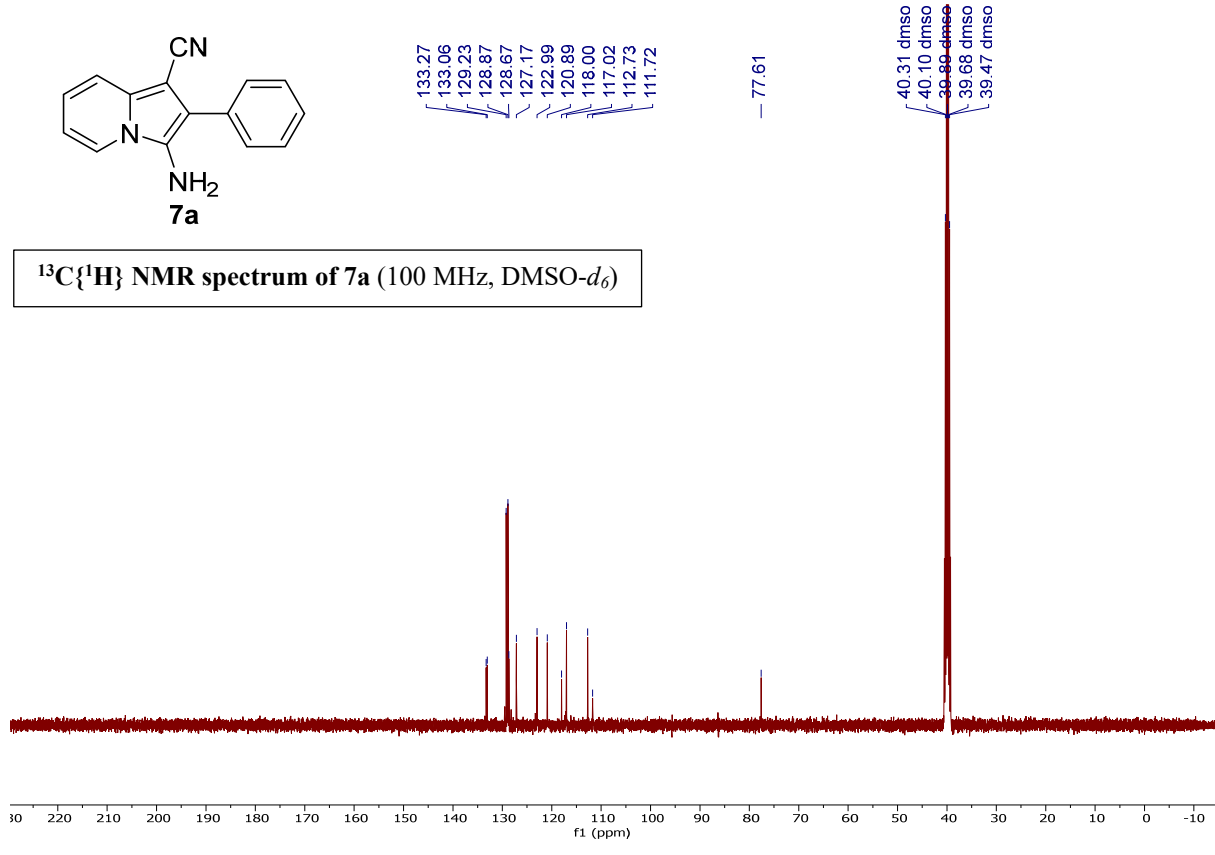

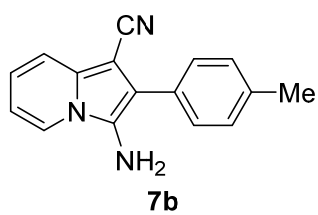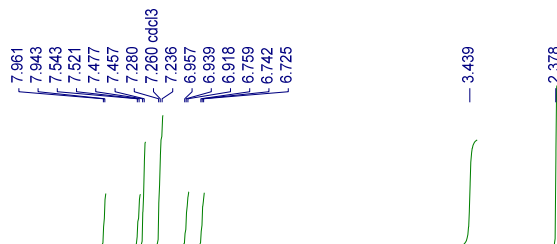

**<sup>1</sup>H NMR spectrum of 7b (400 MHz, CDCl<sub>3</sub>)**

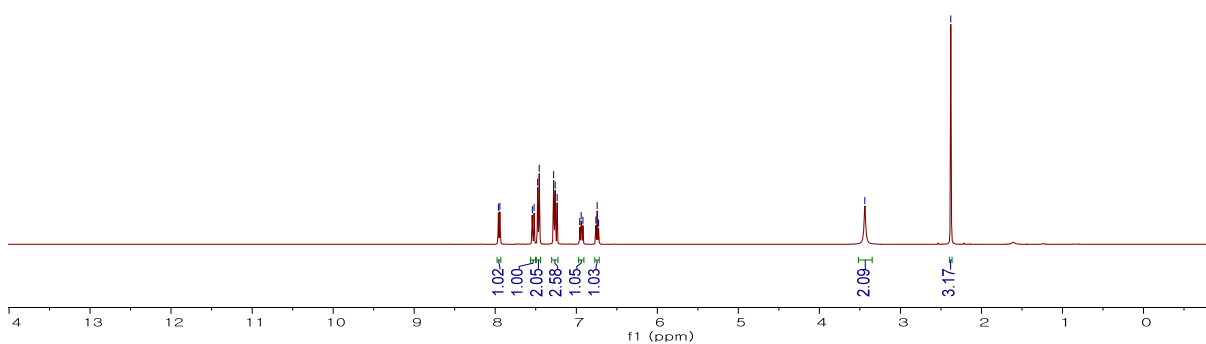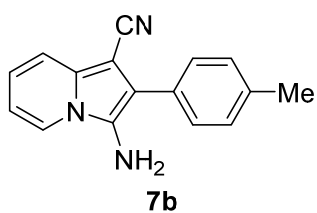

**<sup>13</sup>C{<sup>1</sup>H} NMR spectrum of 7b (100 MHz, CDCl<sub>3</sub>)**

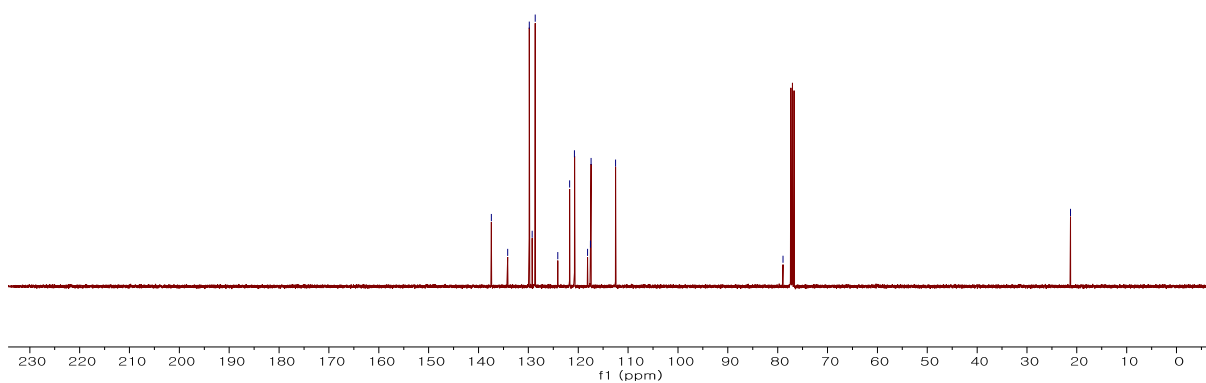

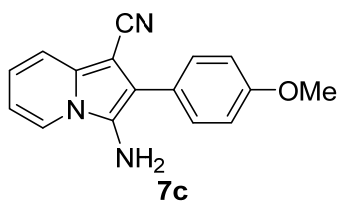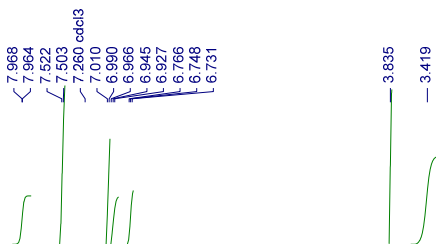

**<sup>1</sup>H NMR spectrum of 7c (400 MHz, CDCl<sub>3</sub>)**

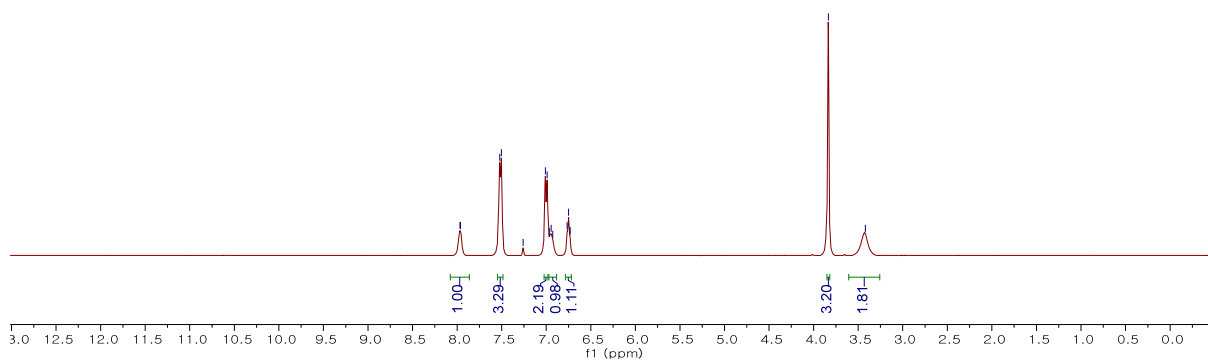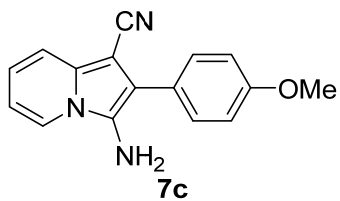

**<sup>13</sup>C{<sup>1</sup>H} NMR spectrum of 7c (100 MHz, CDCl<sub>3</sub>)**

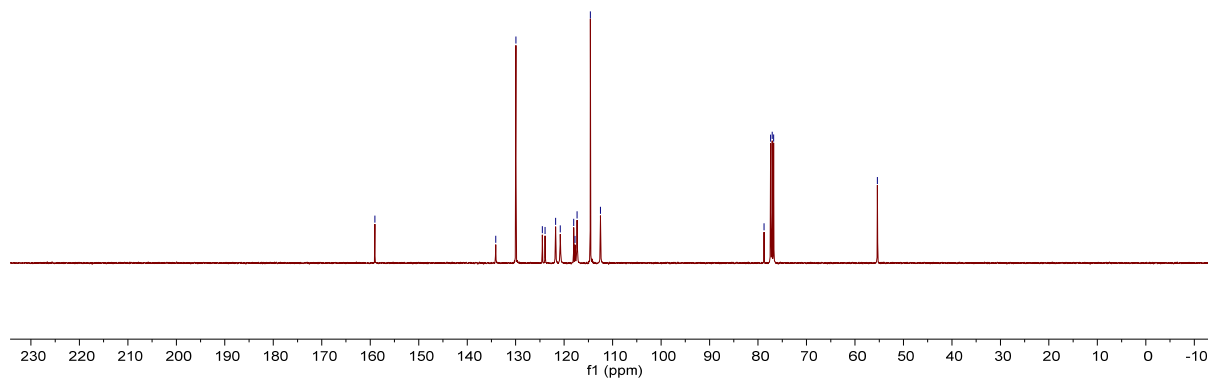

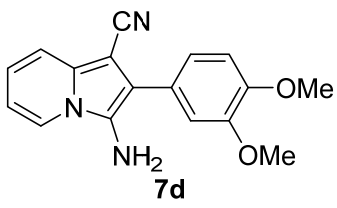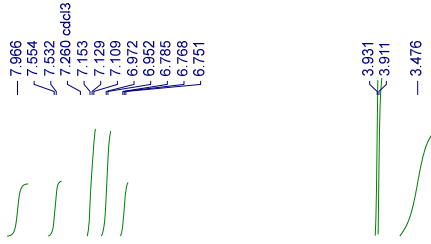

$^1\text{H}$  NMR spectrum of 7d (400 MHz,  $\text{CDCl}_3$ )

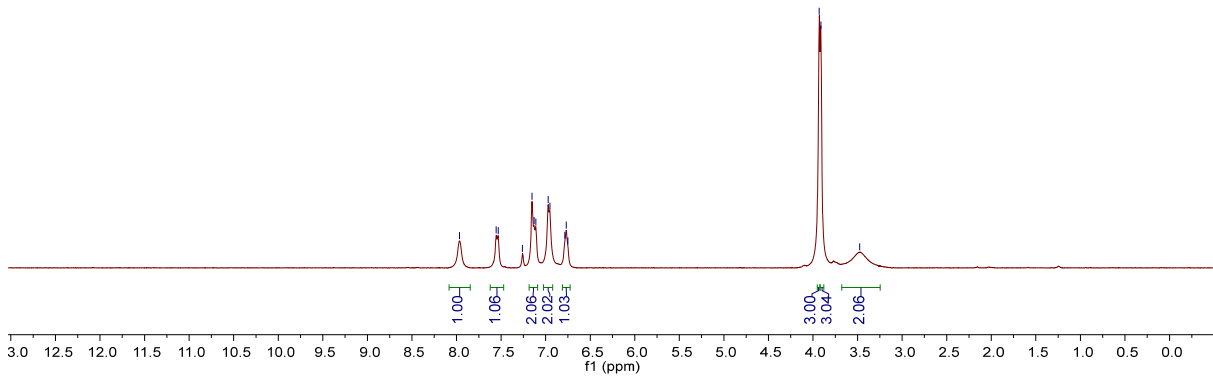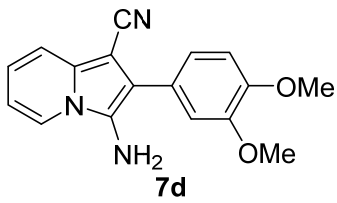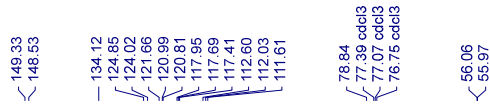

$^{13}\text{C}\{^1\text{H}\}$  NMR spectrum of 7d (100 MHz,  $\text{CDCl}_3$ )

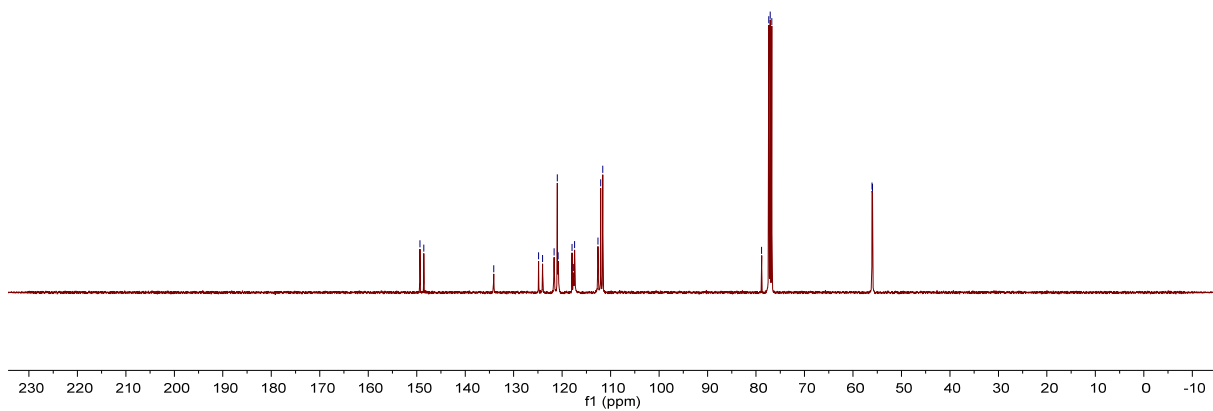

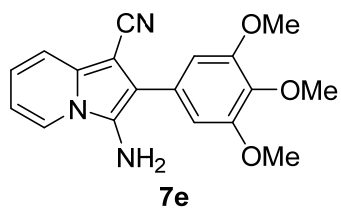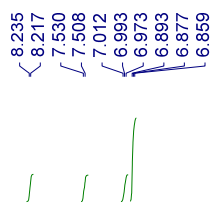

<sup>1</sup>H NMR spectrum of **7e** (400 MHz, DMSO-*d*<sub>6</sub>)

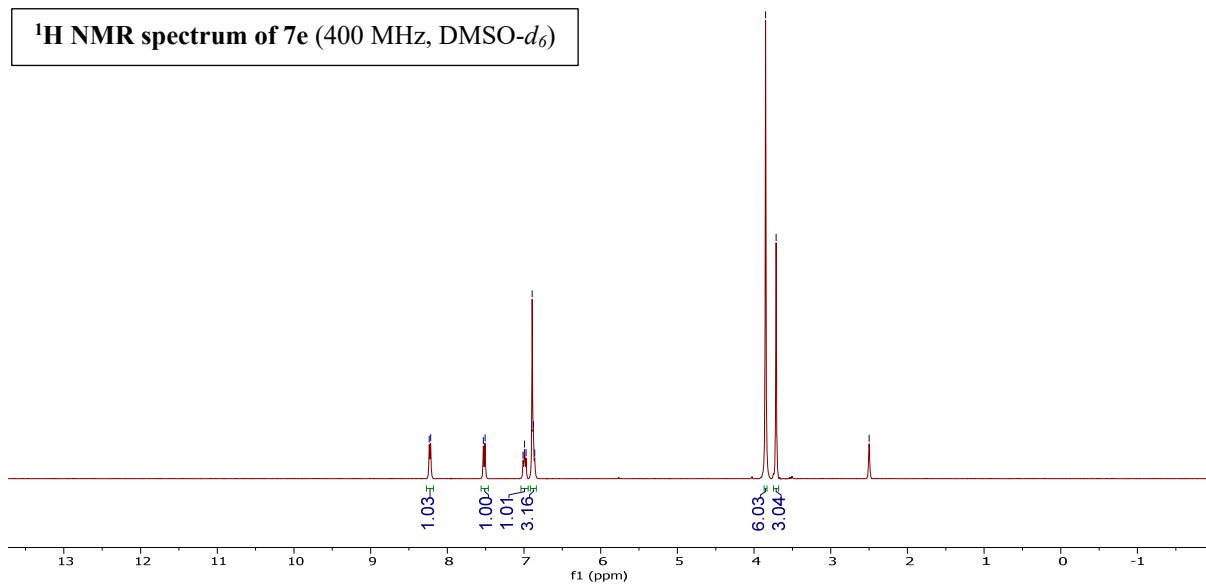

7e

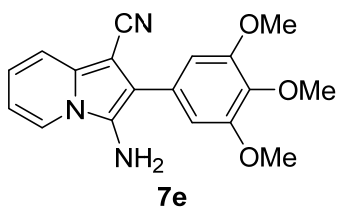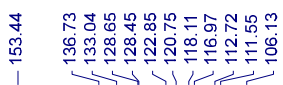

<sup>13</sup>C{<sup>1</sup>H} NMR spectrum of **7e** (100 MHz, DMSO-*d*<sub>6</sub>)

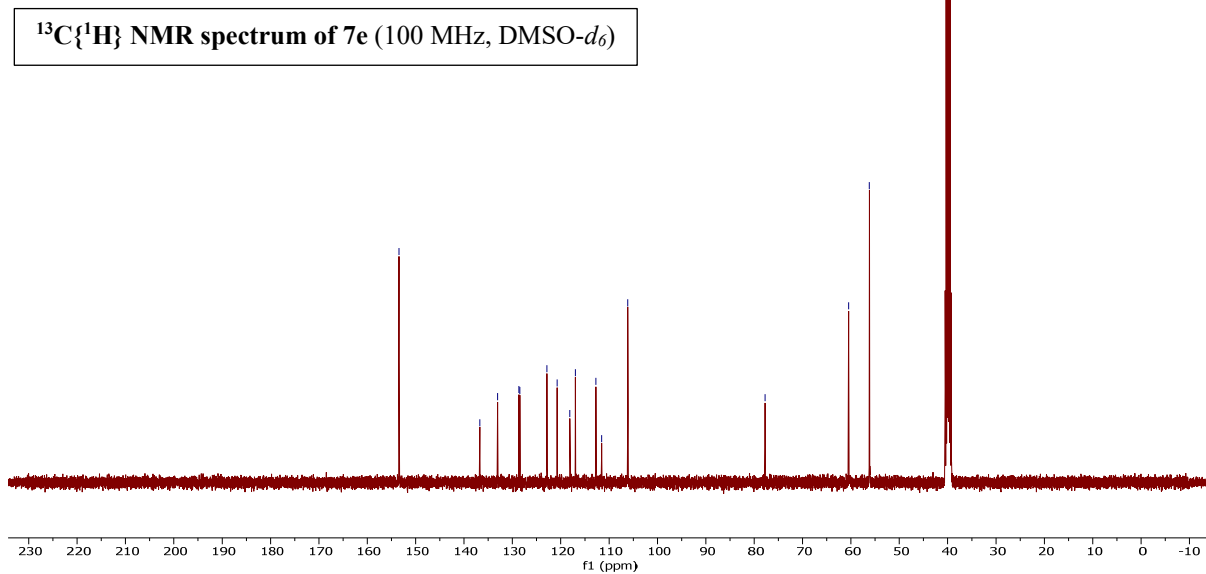

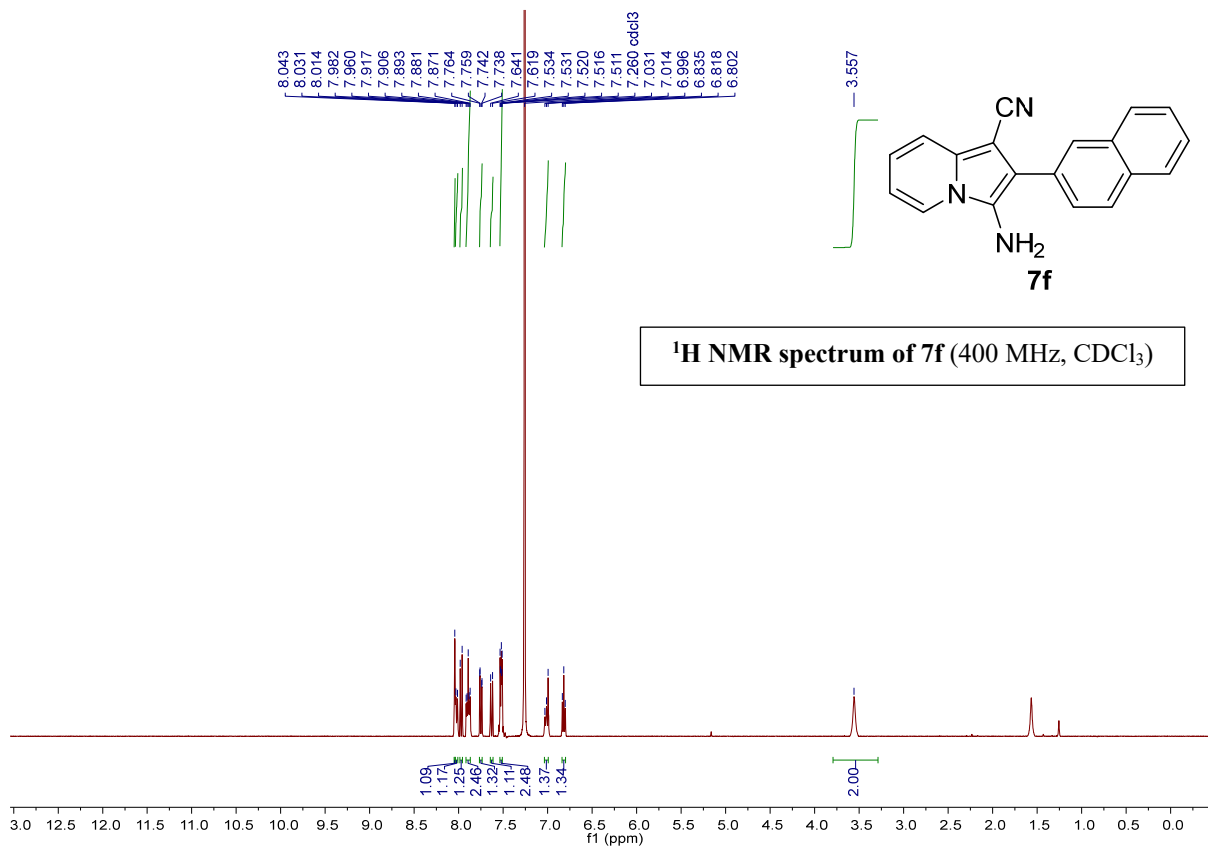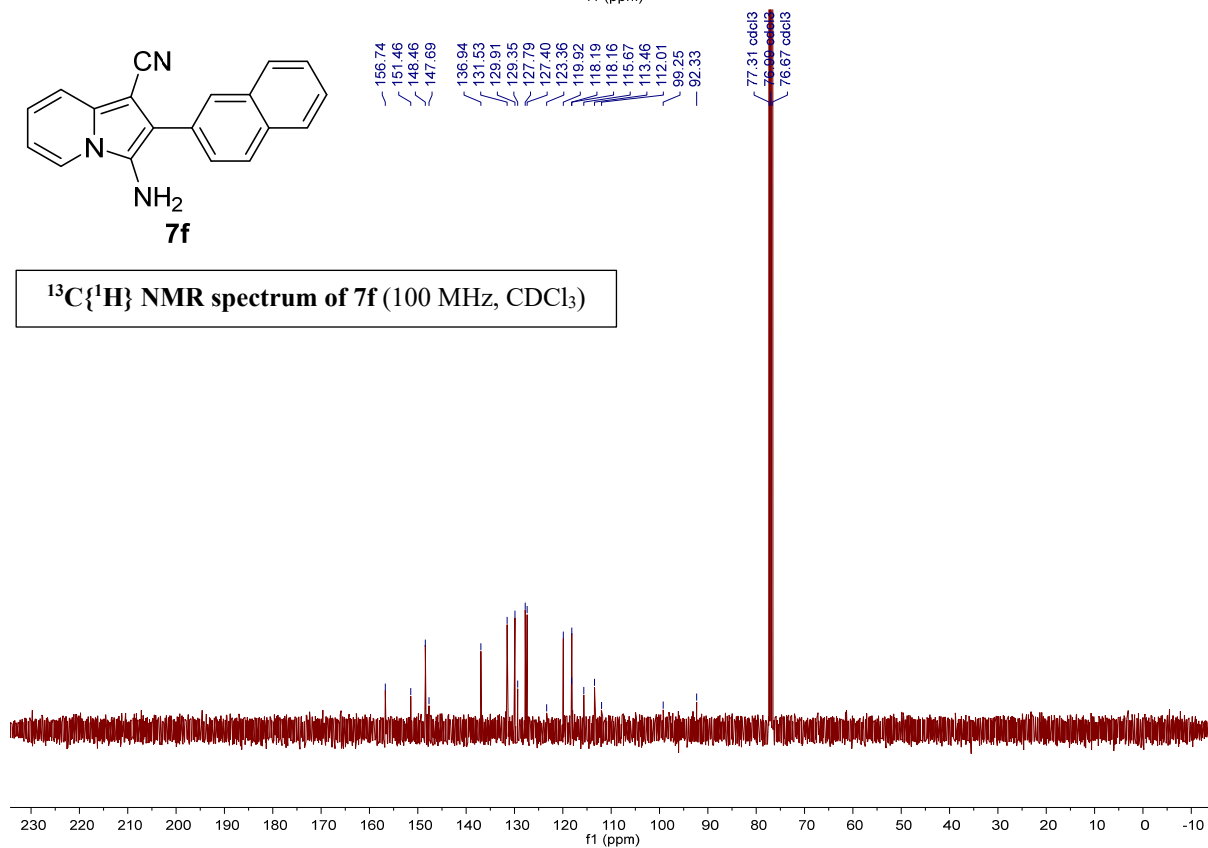



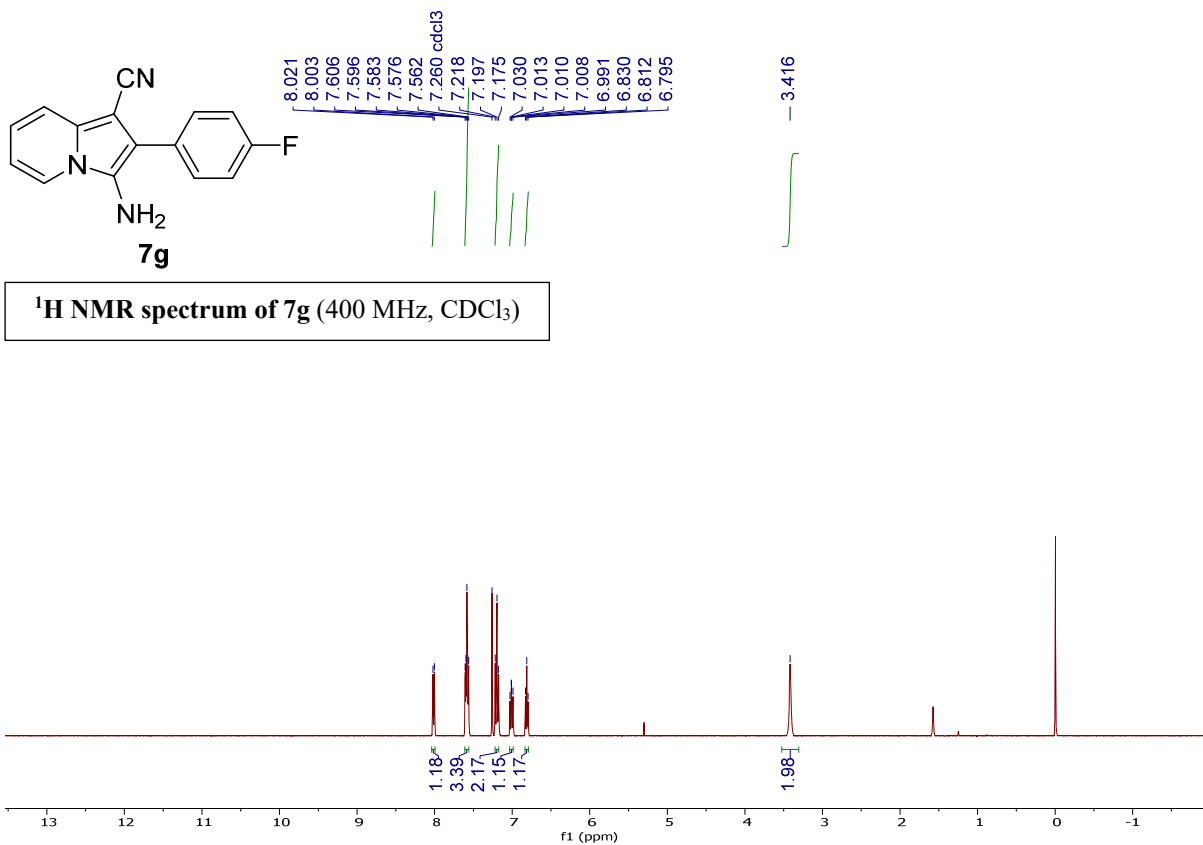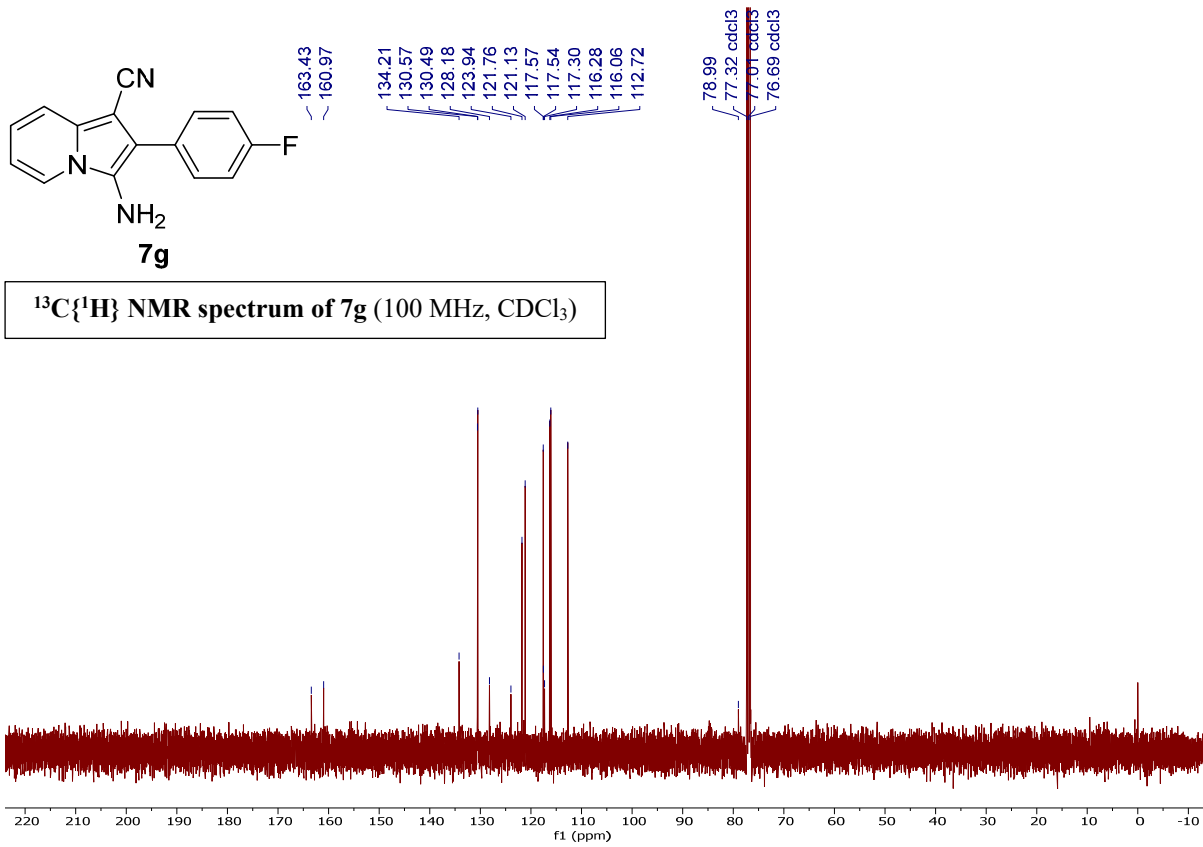

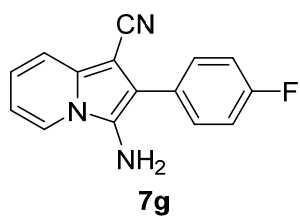

**<sup>19</sup>F NMR spectrum of 7g (376 MHz, CDCl<sub>3</sub>)**

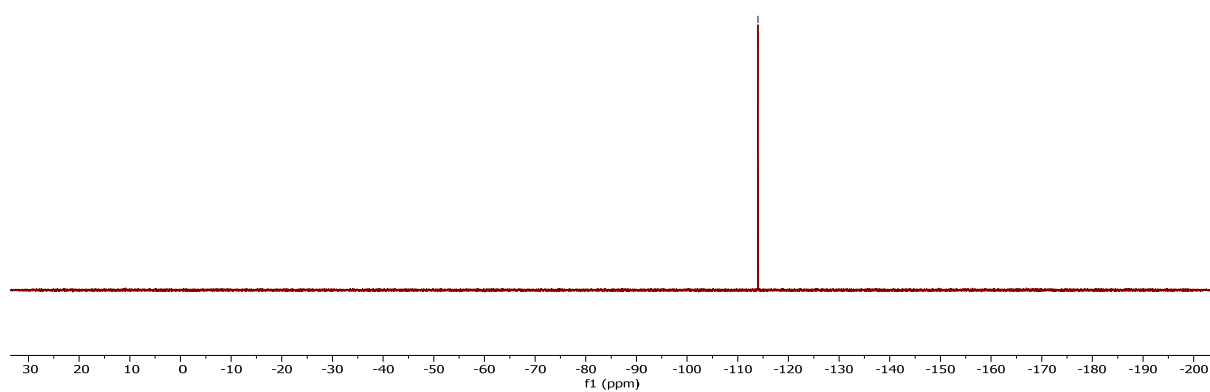

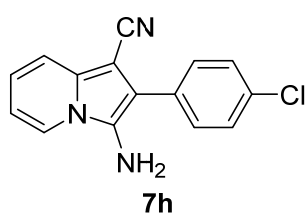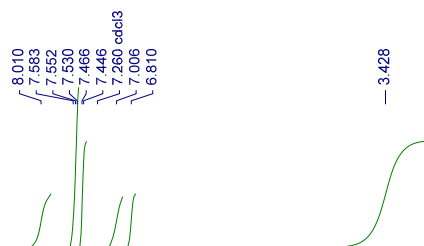

**<sup>1</sup>H NMR spectrum of 7h (400 MHz, CDCl<sub>3</sub>)**

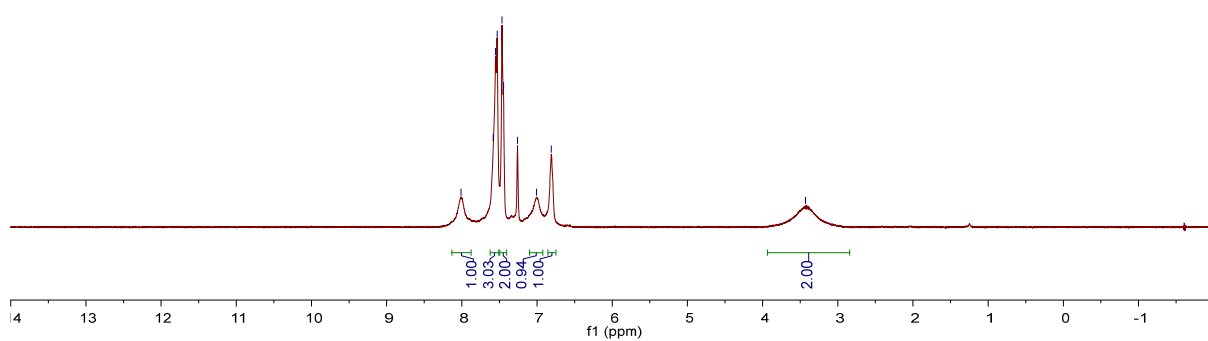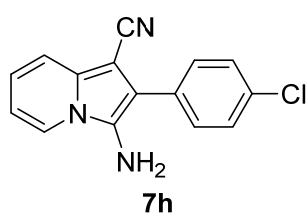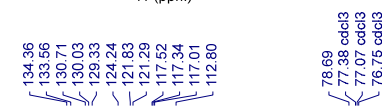

**<sup>13</sup>C{<sup>1</sup>H} NMR spectrum of 7h (100 MHz, CDCl<sub>3</sub>)**

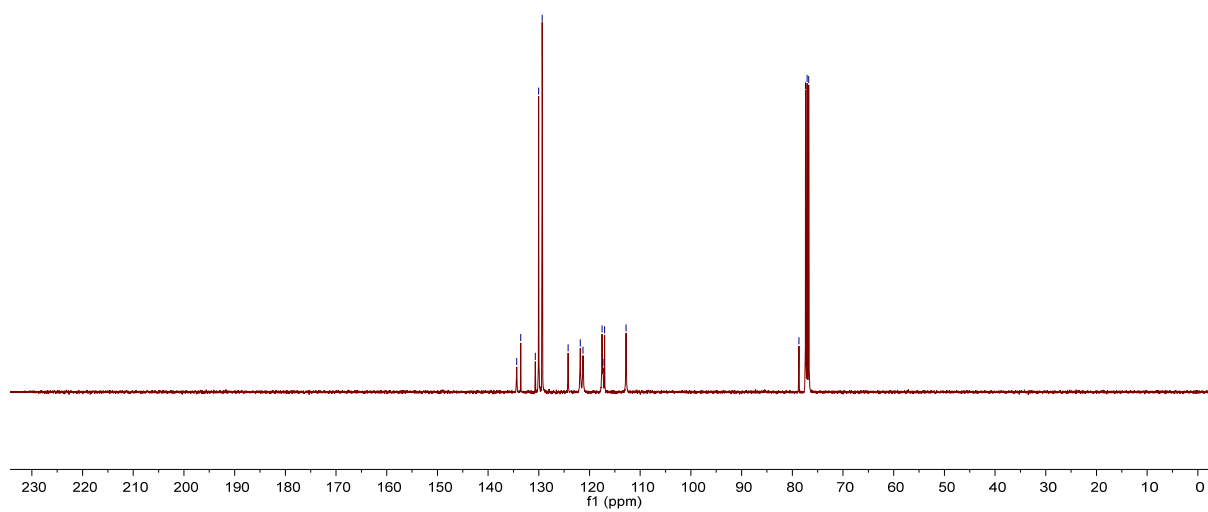

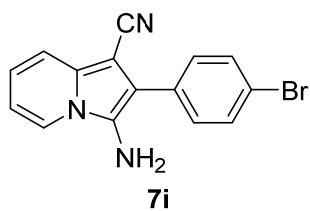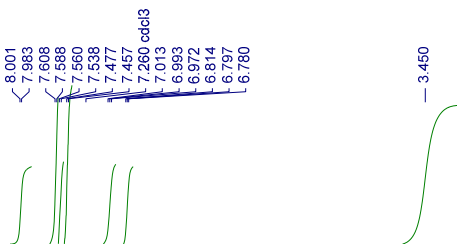

**$^1\text{H}$  NMR spectrum of 7i (400 MHz,  $\text{CDCl}_3$ )**

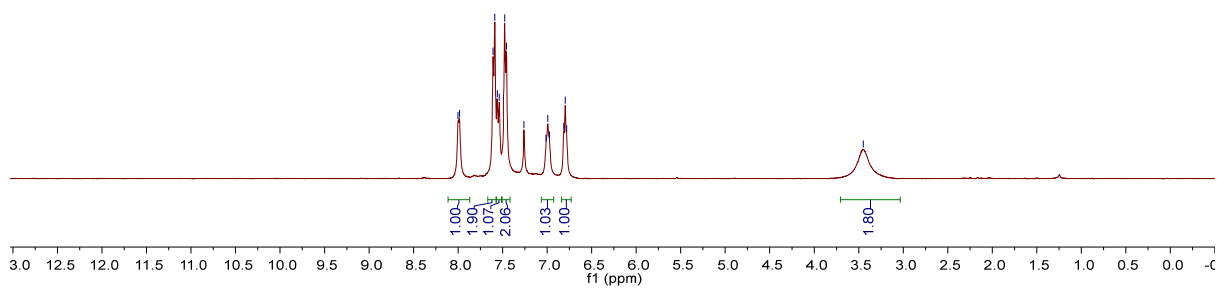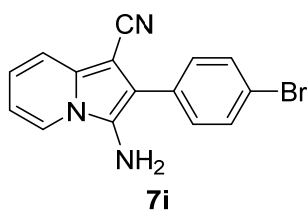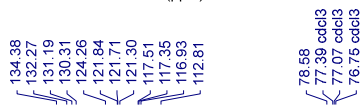

**$^{13}\text{C}\{^1\text{H}\}$  NMR spectrum of 7i (100 MHz,  $\text{CDCl}_3$ )**

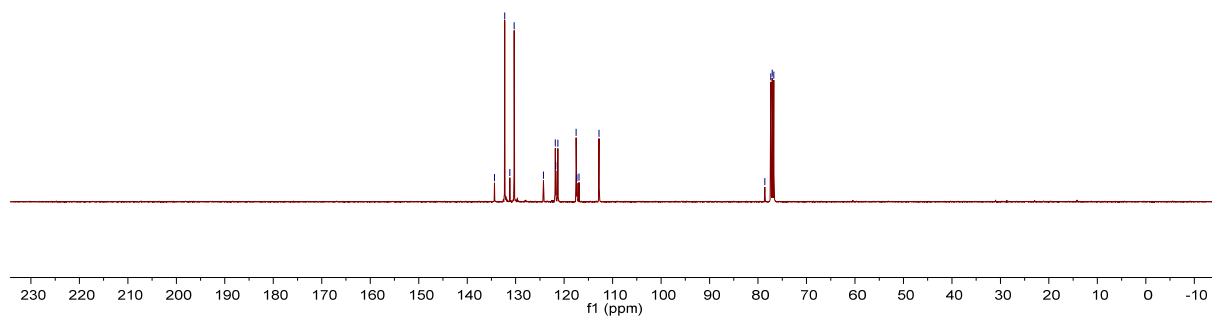

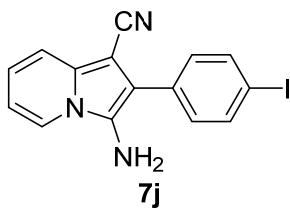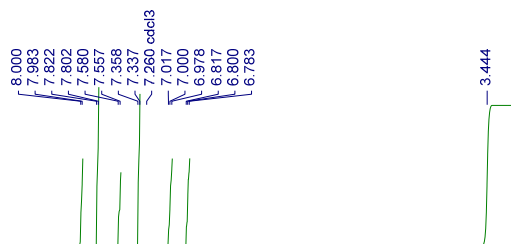

**<sup>1</sup>H NMR spectrum of 7j (400 MHz, CDCl<sub>3</sub>)**

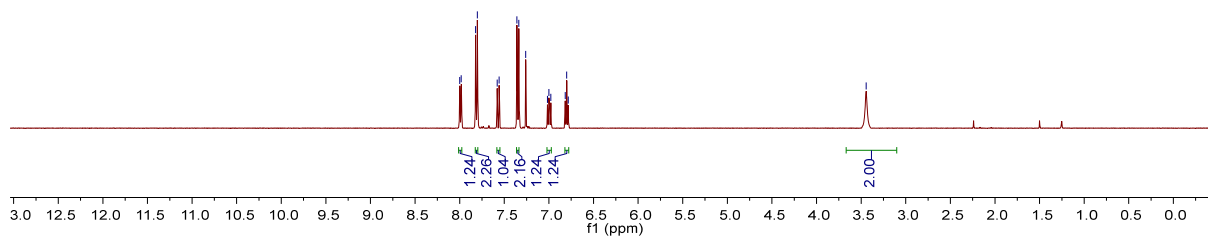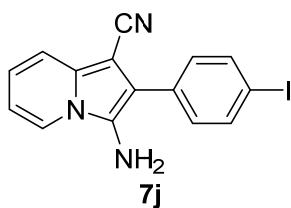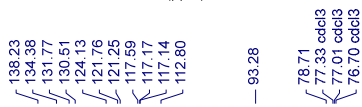

**<sup>13</sup>C{<sup>1</sup>H} NMR spectrum of 7j (100 MHz, CDCl<sub>3</sub>)**

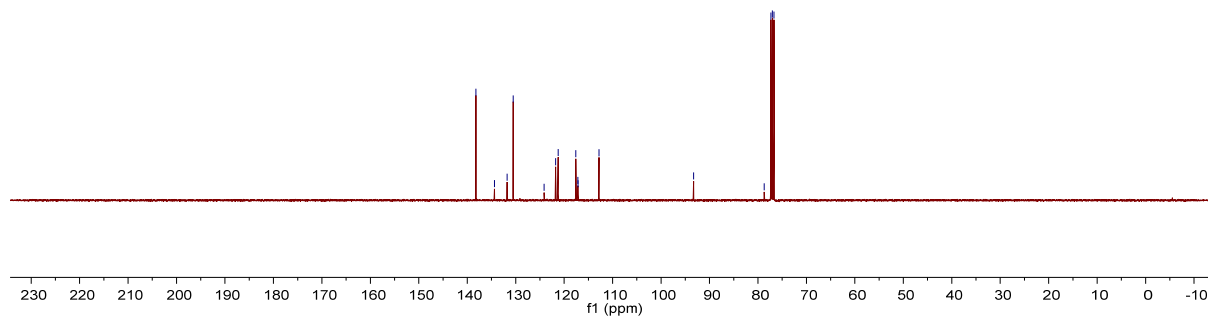

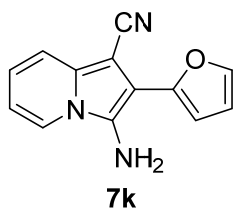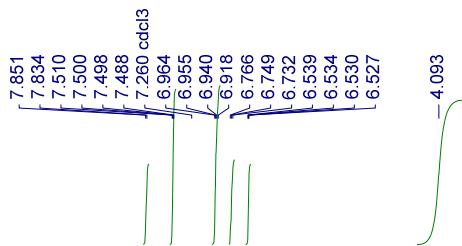

**<sup>1</sup>H NMR spectrum of 7k (400 MHz, CDCl<sub>3</sub>)**

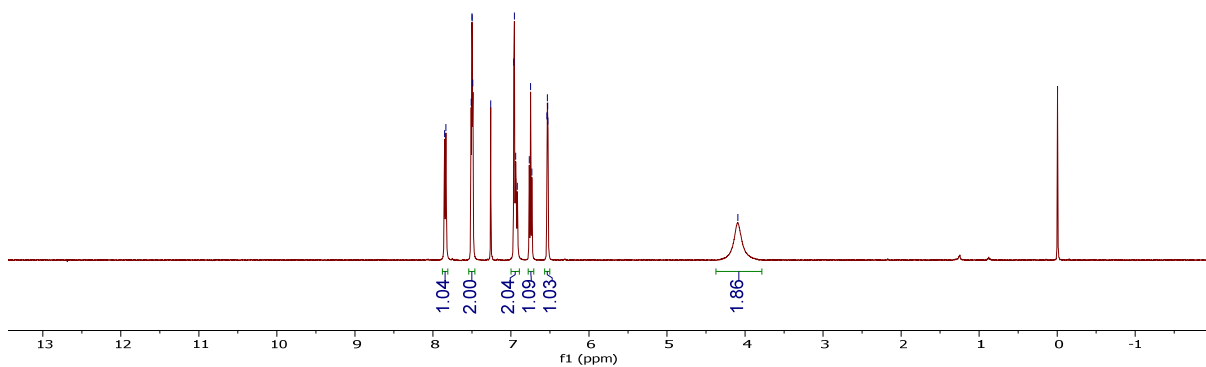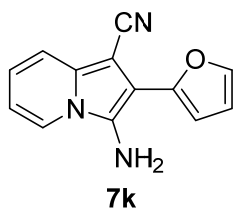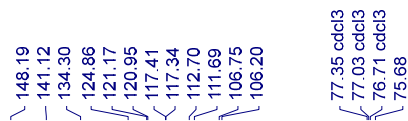

**<sup>13</sup>C{<sup>1</sup>H} NMR spectrum of 7k (100 MHz, CDCl<sub>3</sub>)**

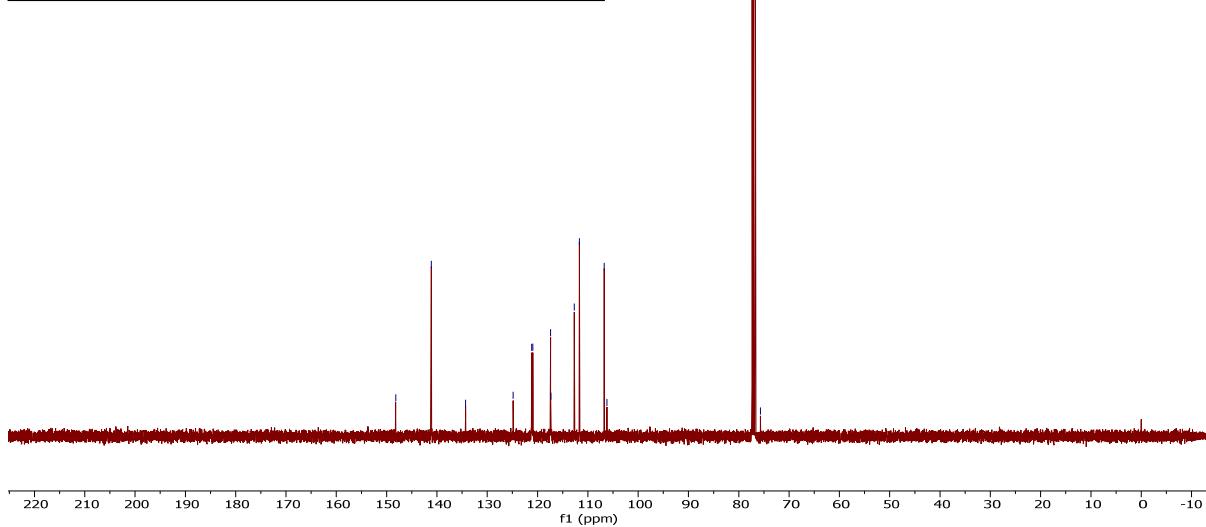

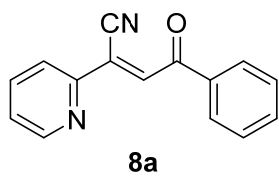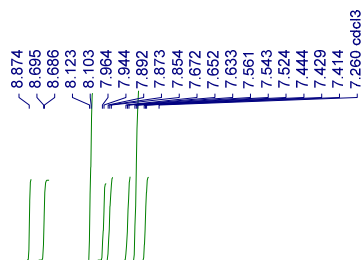

**<sup>1</sup>H NMR spectrum of 8a (400 MHz, CDCl<sub>3</sub>)**

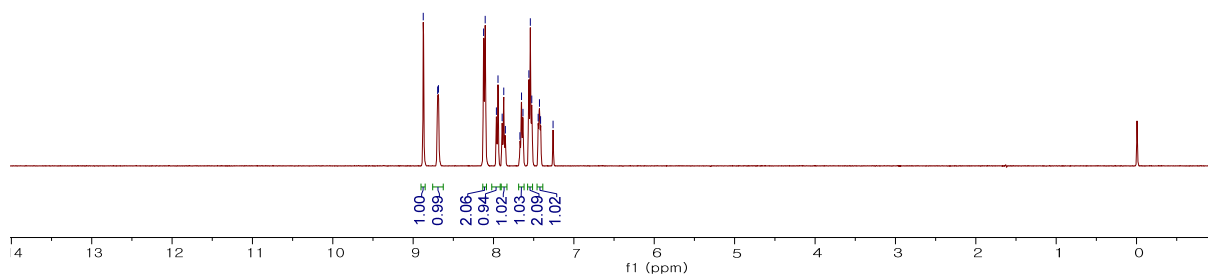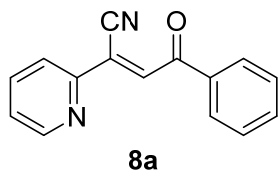

187.40

150.05  
149.06  
137.72  
136.57  
136.30  
134.21  
129.00  
128.90  
125.68  
123.40  
122.86  
115.79

77.35 cdcl3  
77.03 cdcl3  
76.71 cdcl3

**<sup>13</sup>C{<sup>1</sup>H} NMR spectrum of 8a (100 MHz, CDCl<sub>3</sub>)**

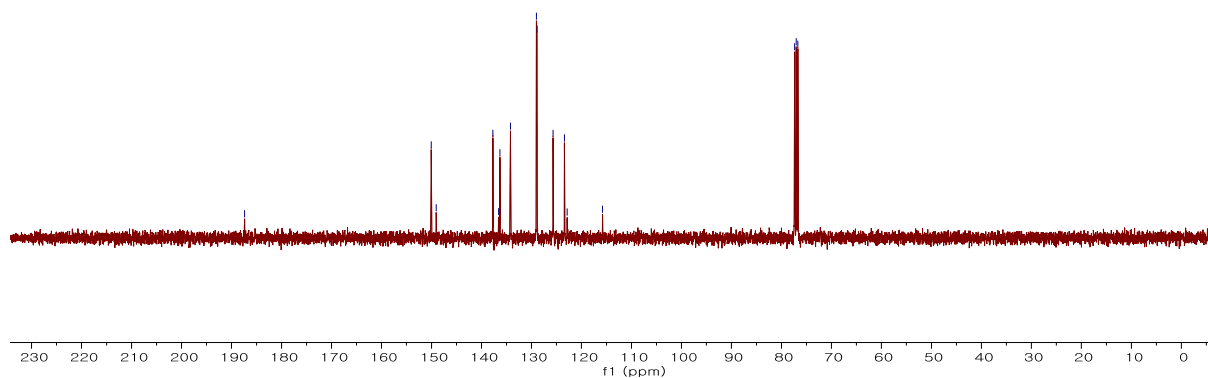

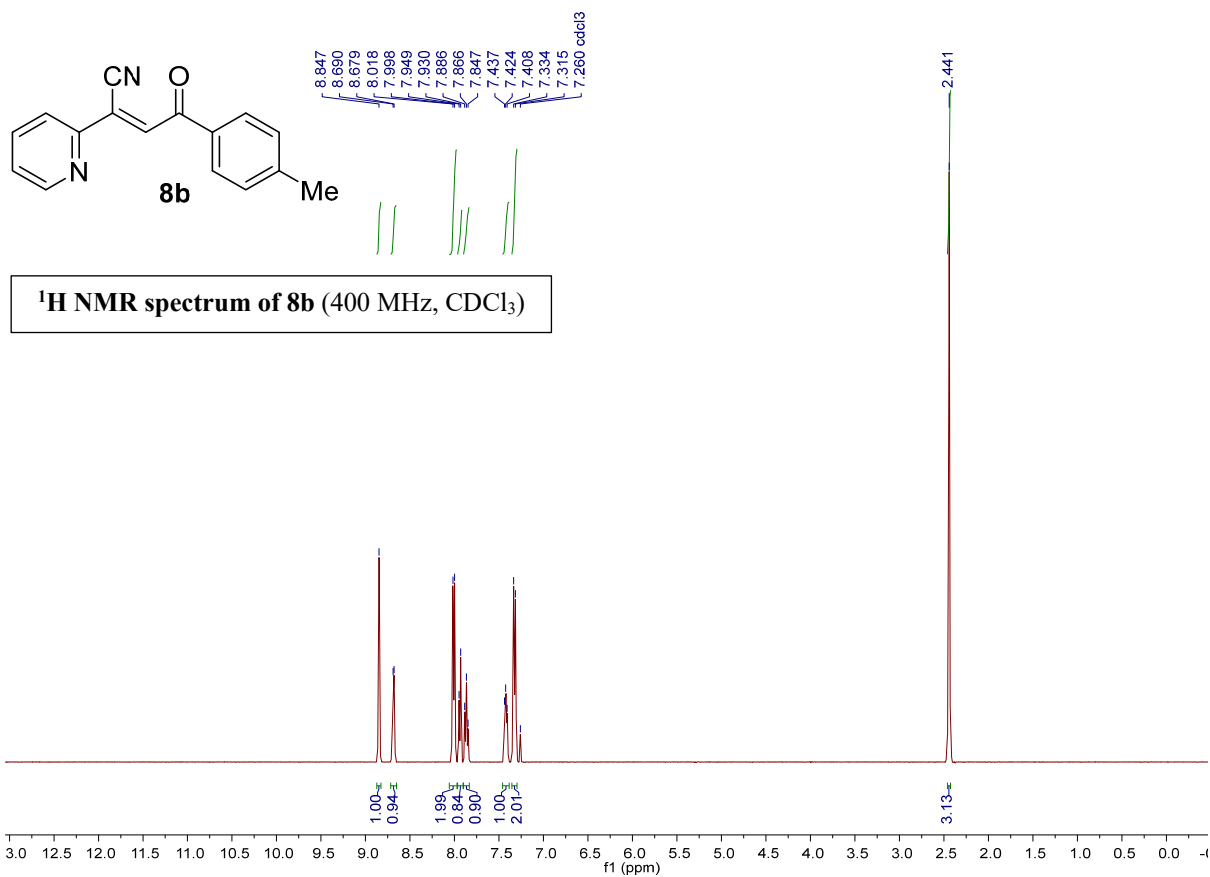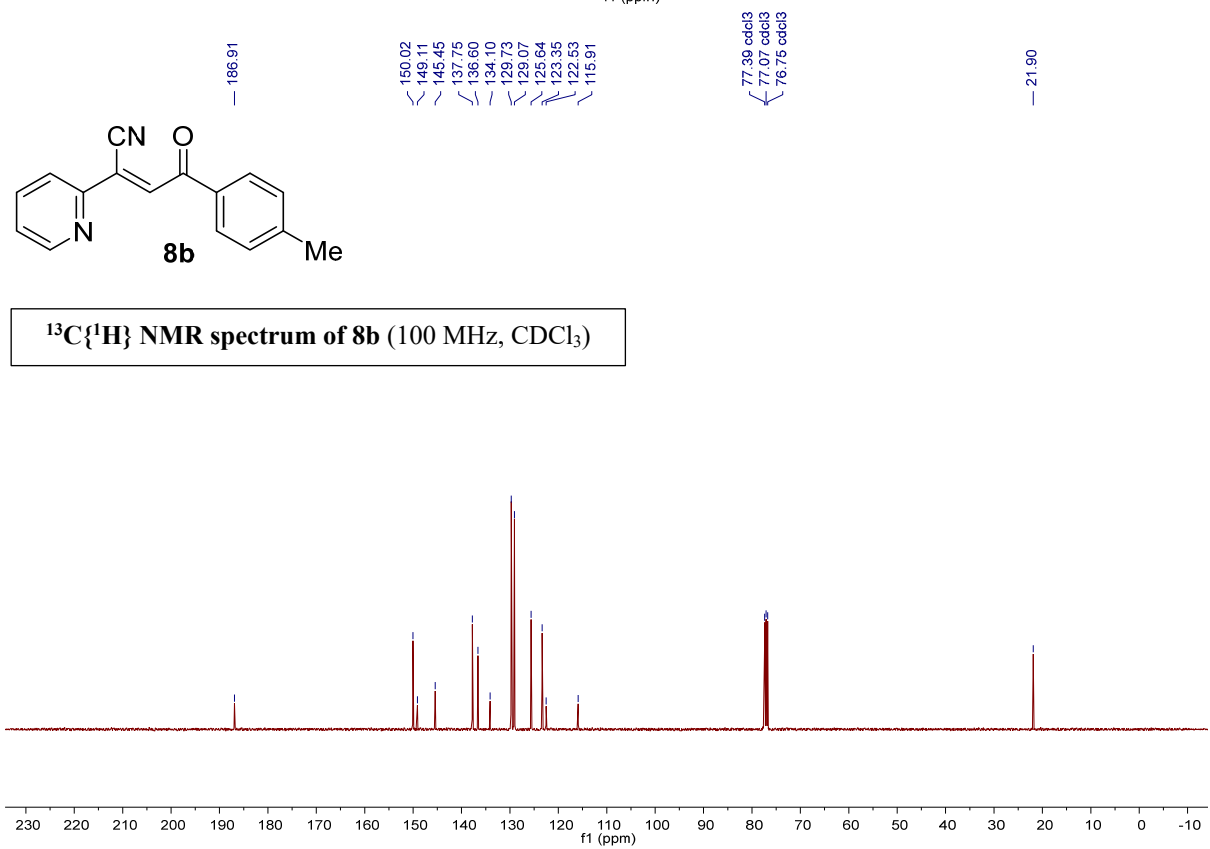



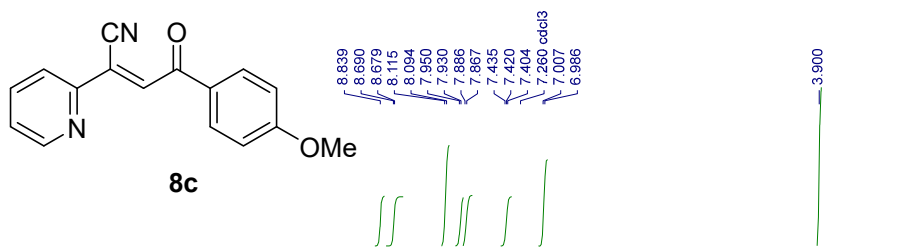

**<sup>1</sup>H NMR spectrum of 8c (400 MHz, CDCl<sub>3</sub>)**

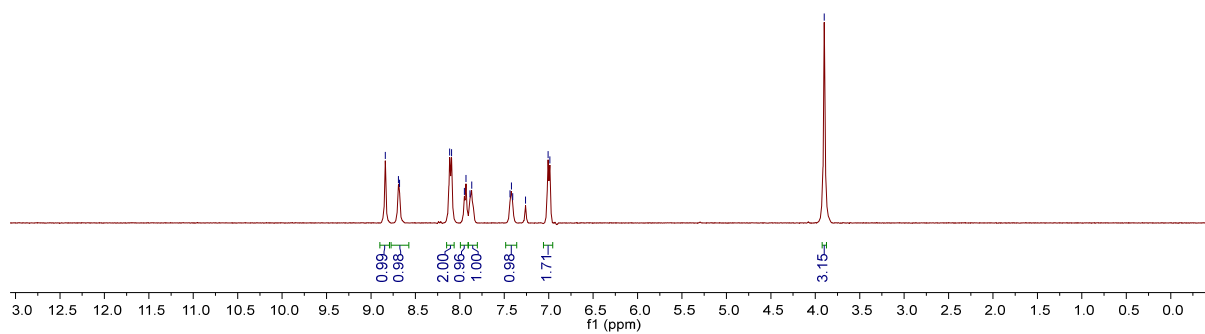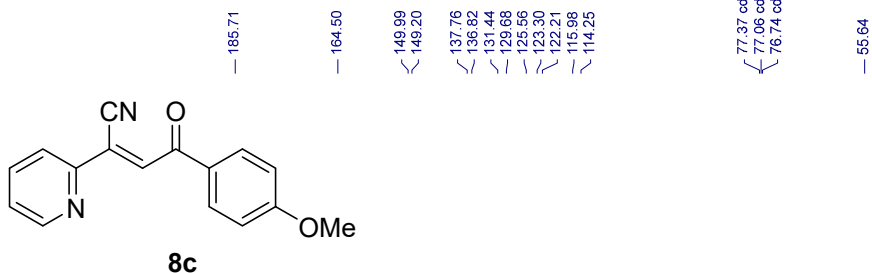

**<sup>13</sup>C{<sup>1</sup>H} NMR spectrum of 8c (100 MHz, CDCl<sub>3</sub>)**

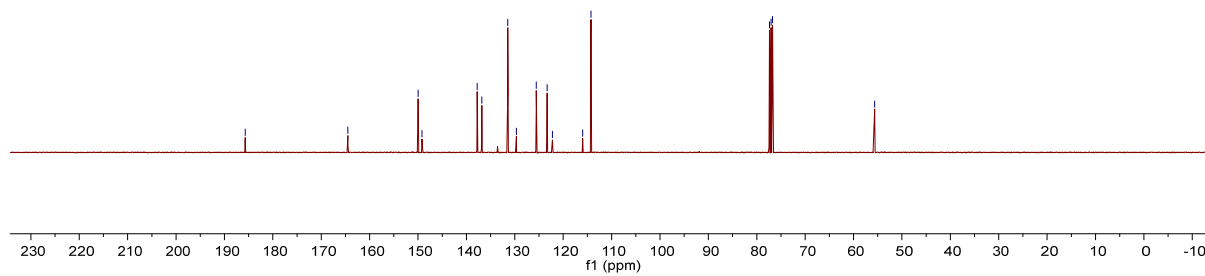

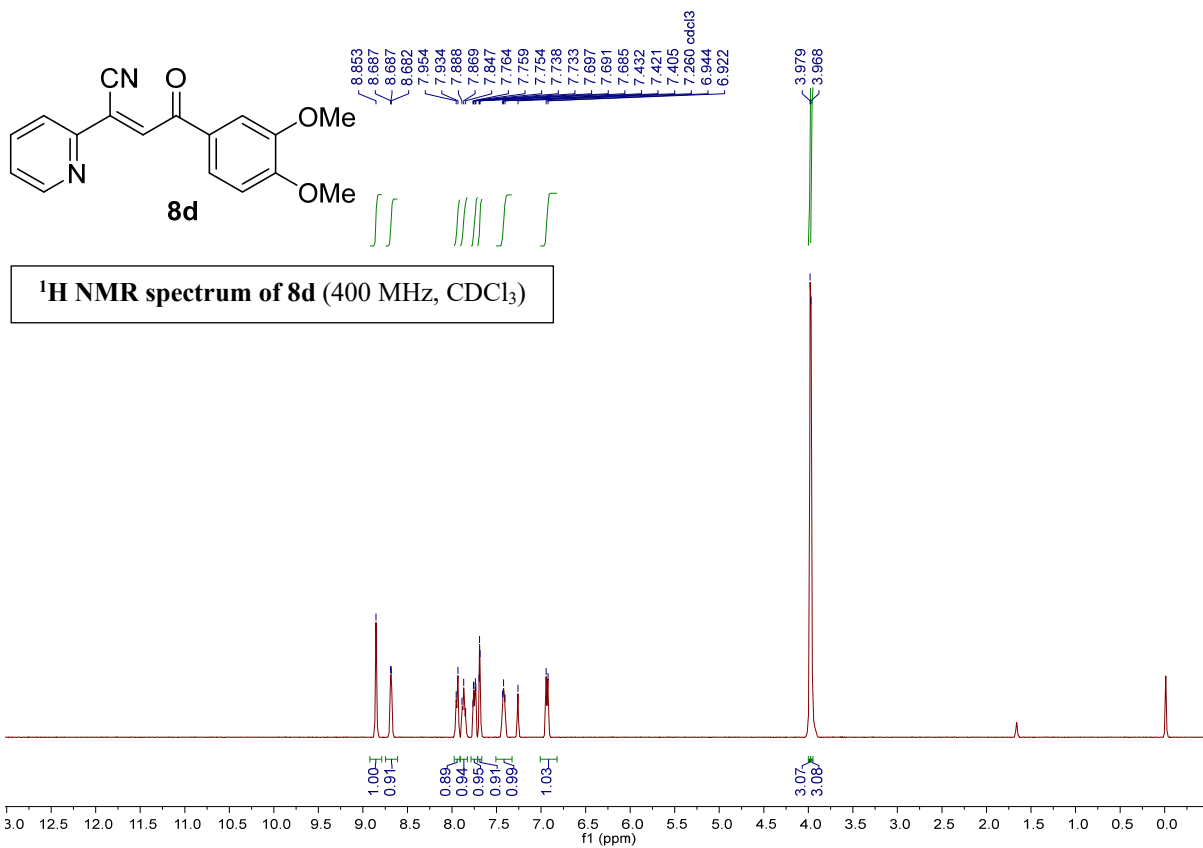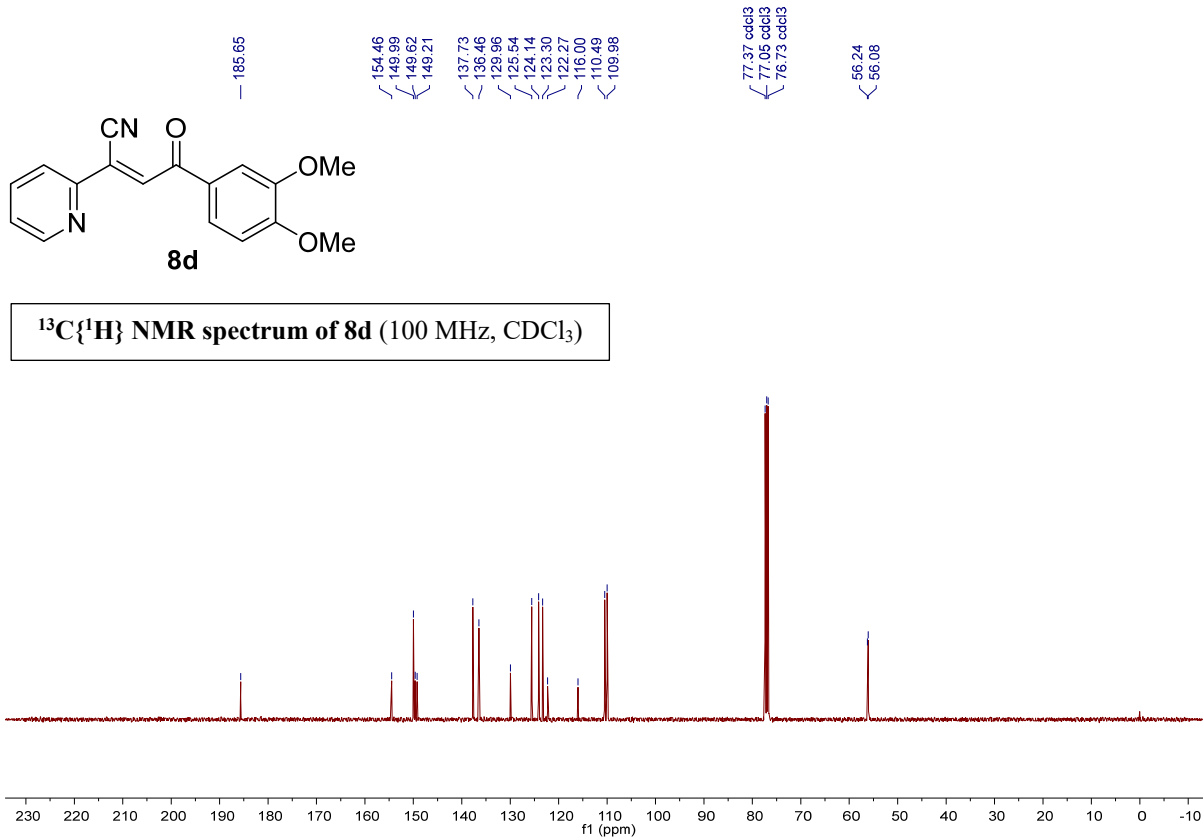

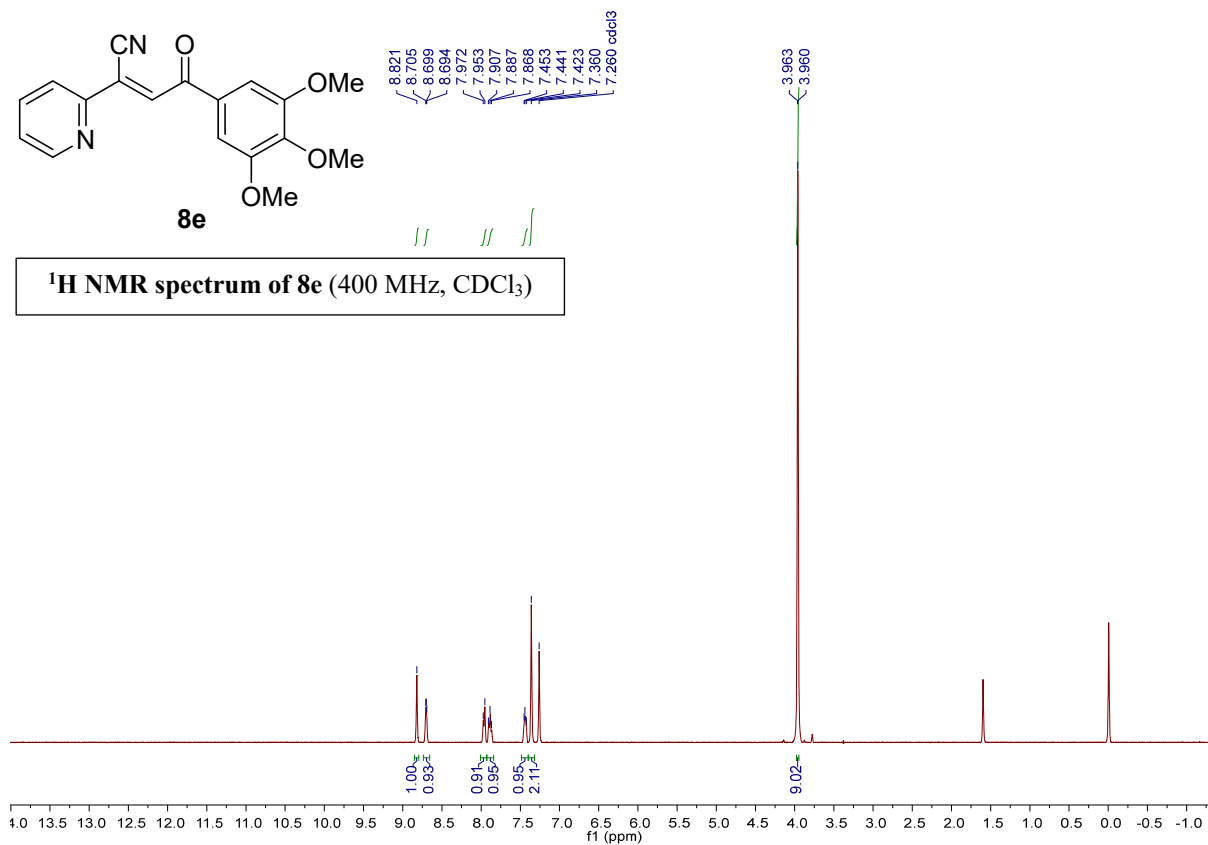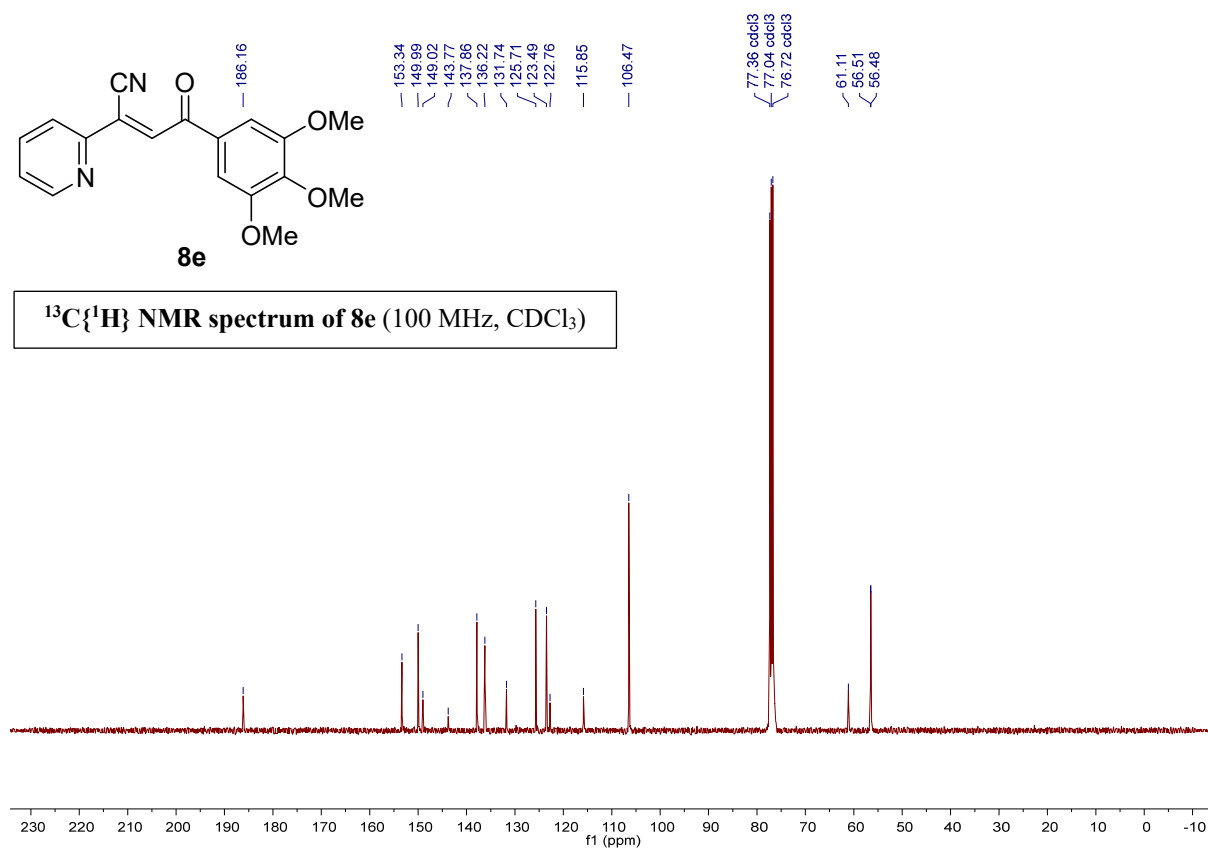

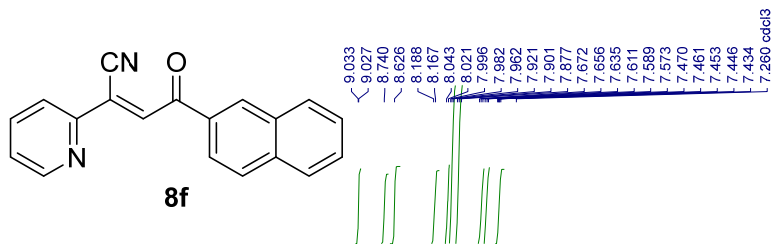

**$^1\text{H}$  NMR spectrum of **8f** (400 MHz,  $\text{CDCl}_3$ )**

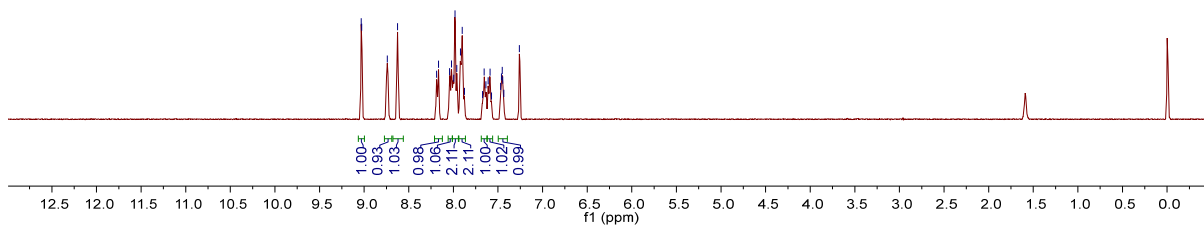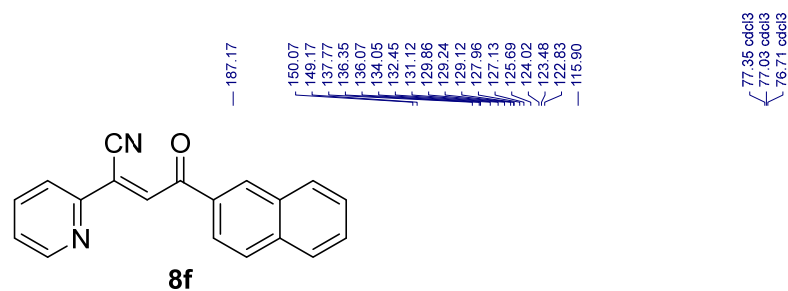

**$^{13}\text{C}\{^1\text{H}\}$  NMR spectrum of **8f** (100 MHz,  $\text{CDCl}_3$ )**

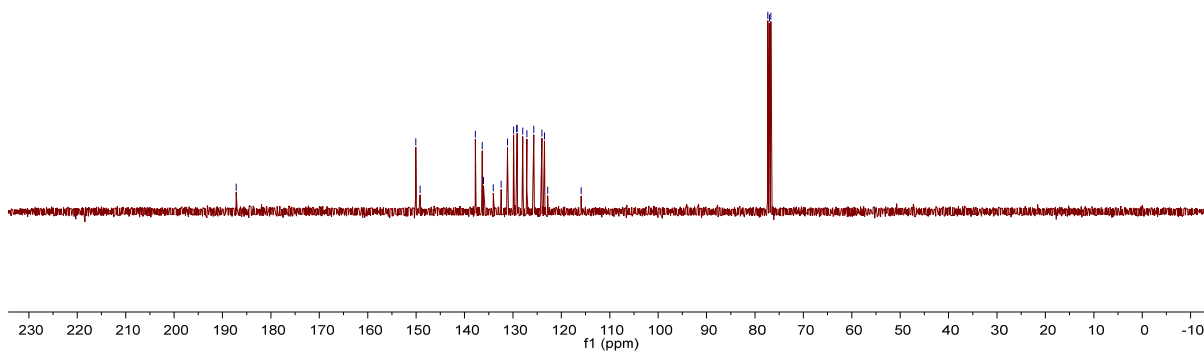

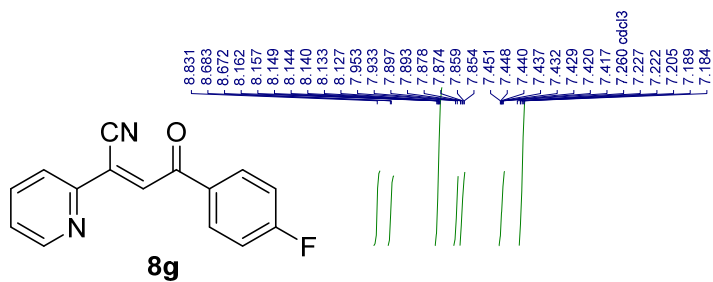

**<sup>1</sup>H NMR spectrum of 8g (400 MHz, CDCl<sub>3</sub>)**

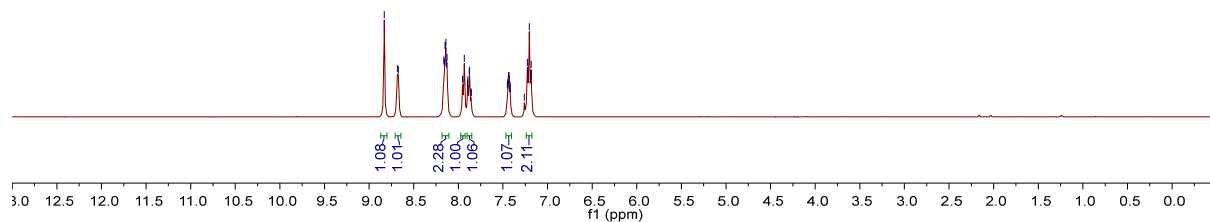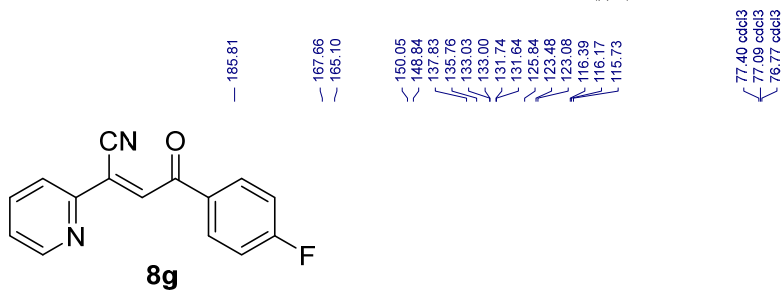

**<sup>13</sup>C{<sup>1</sup>H} NMR spectrum of 8g (100 MHz, CDCl<sub>3</sub>)**

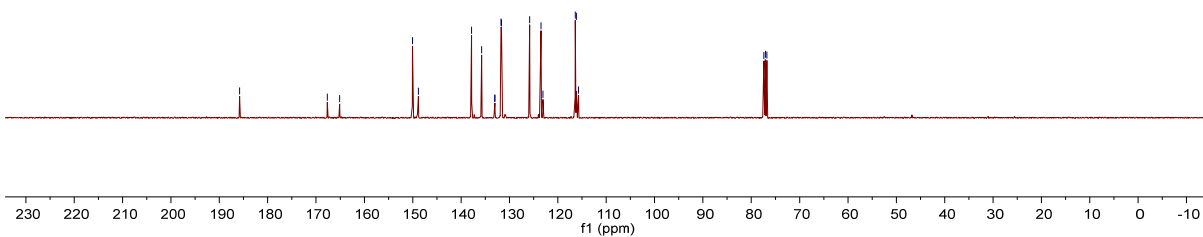

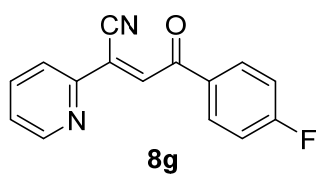

-102.638

**<sup>19</sup>F NMR spectrum of 8g (376 MHz, CDCl<sub>3</sub>)**

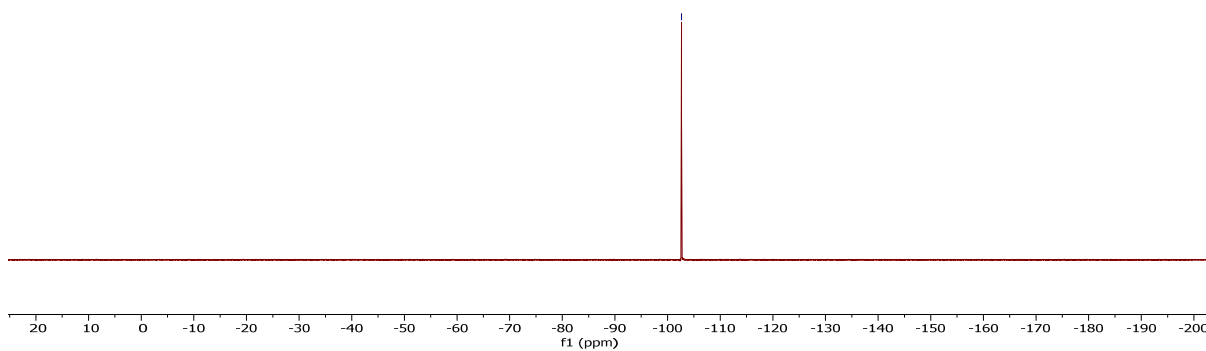

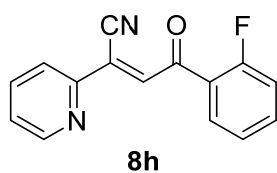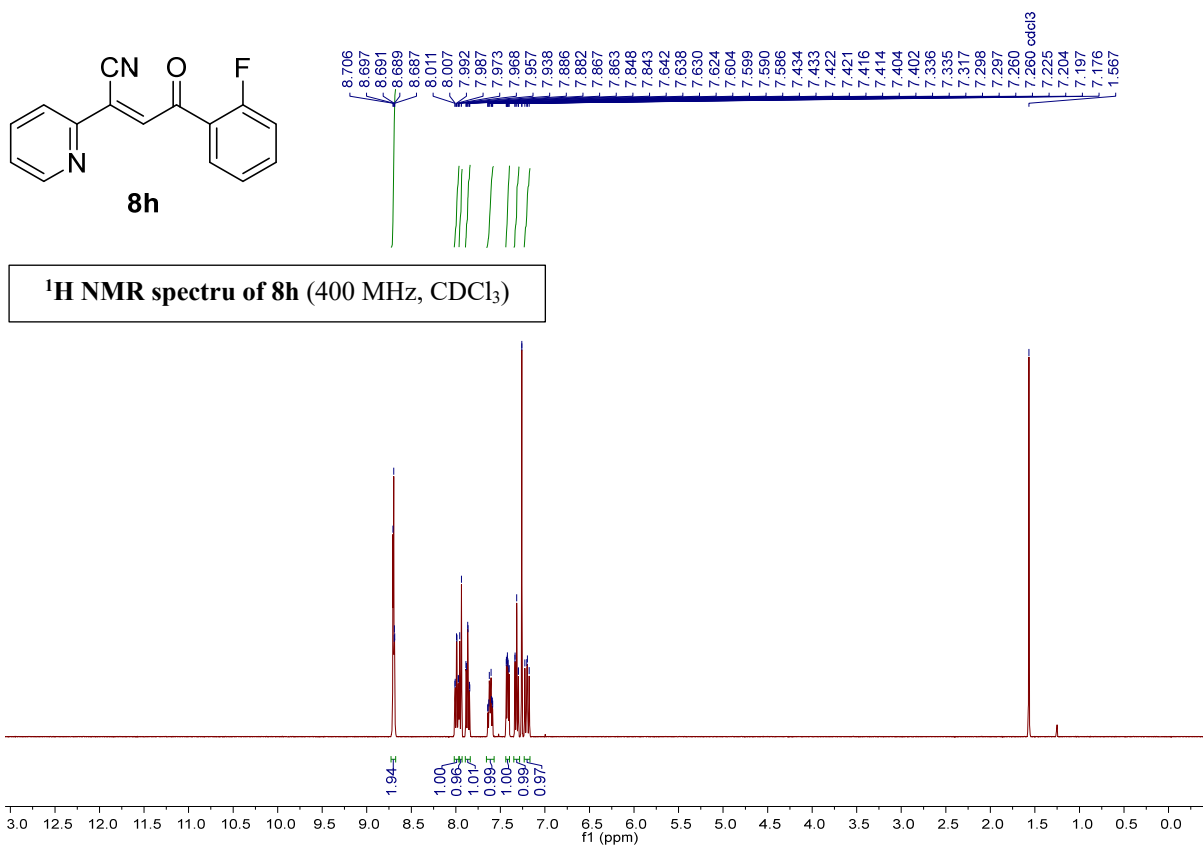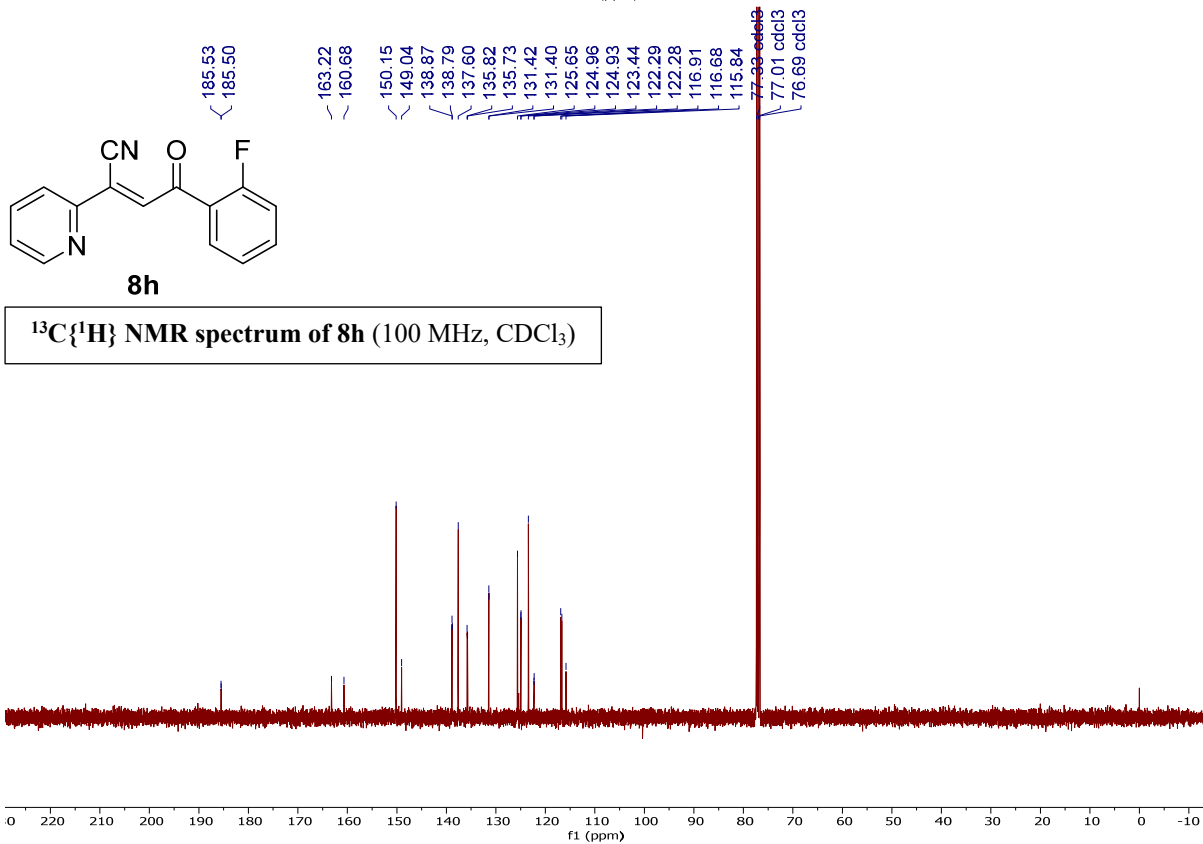

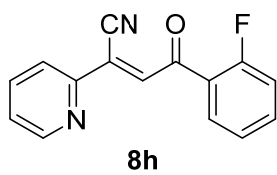

**<sup>19</sup>F NMR spectrum of 8h (376 MHz, CDCl<sub>3</sub>)**

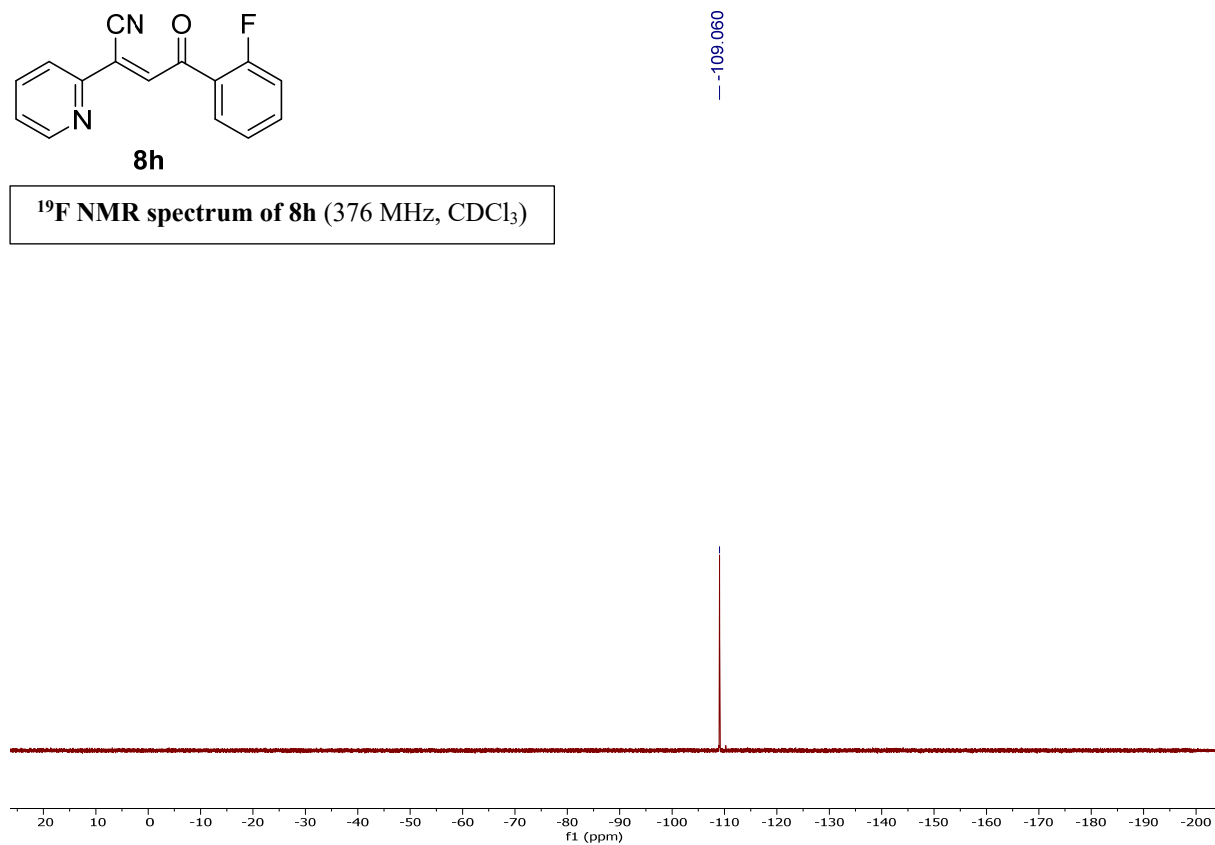



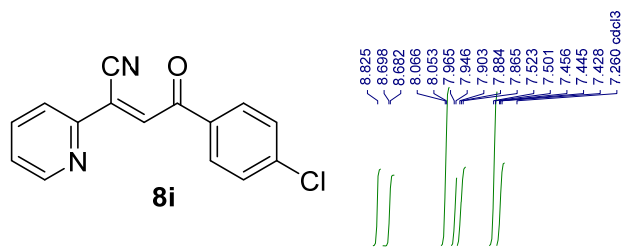

**<sup>1</sup>H NMR spectrum of 8i (400 MHz, CDCl<sub>3</sub>)**

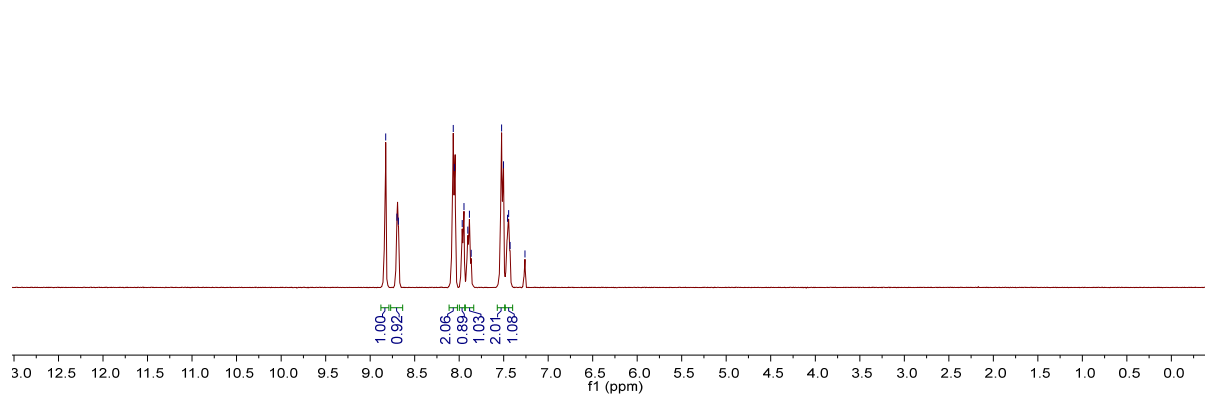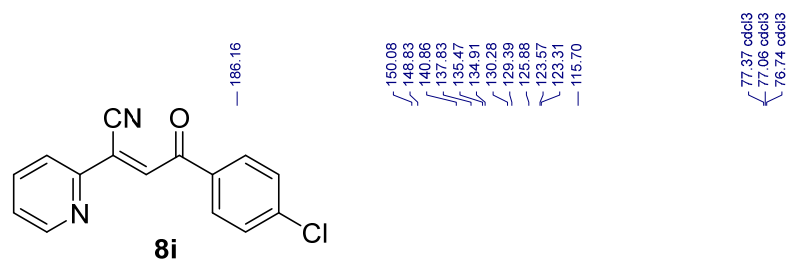

**<sup>13</sup>C{<sup>1</sup>H} NMR spectrum of 8i (100 MHz, CDCl<sub>3</sub>)**

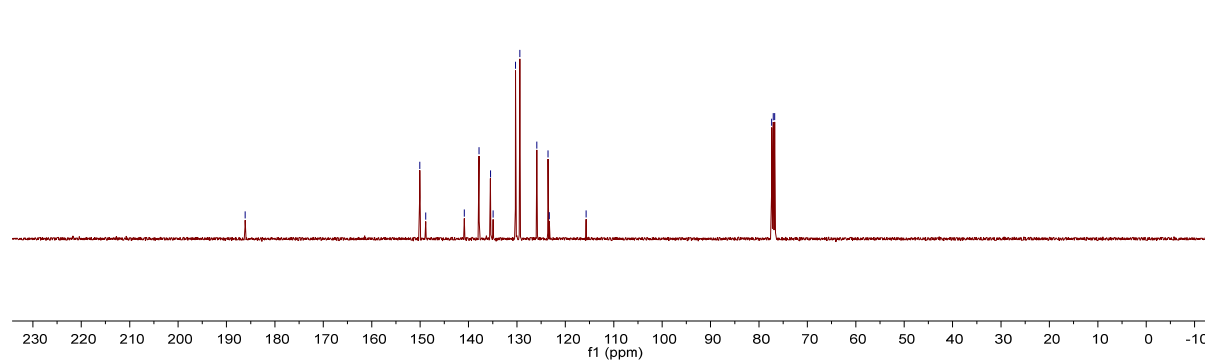

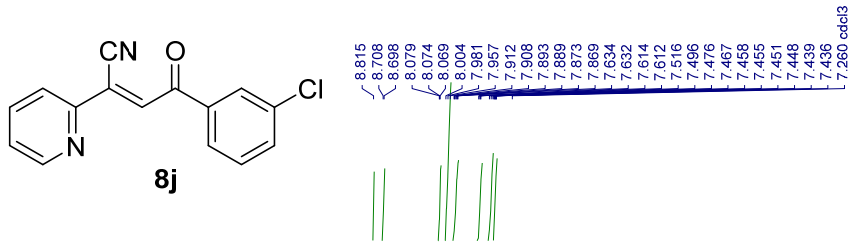

**<sup>1</sup>H NMR spectrum of 8j (400 MHz, CDCl<sub>3</sub>)**

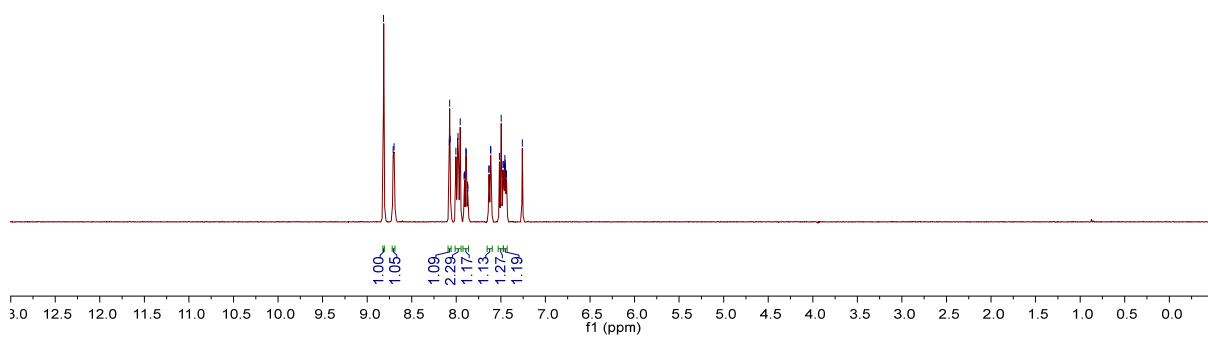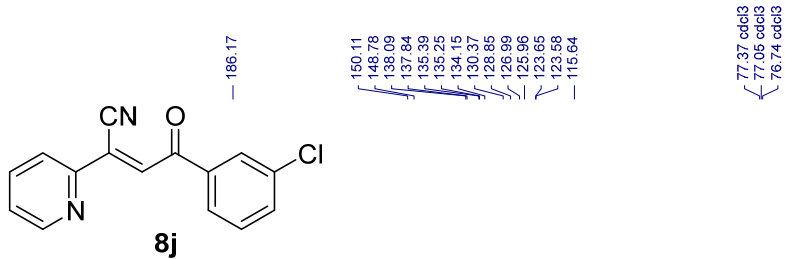

**<sup>13</sup>C{<sup>1</sup>H} NMR spectrum of 8j (100 MHz, CDCl<sub>3</sub>)**

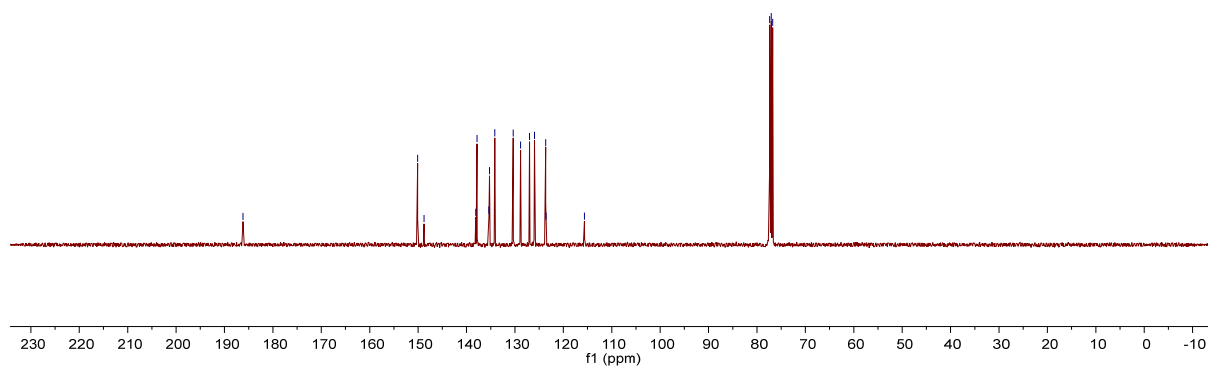

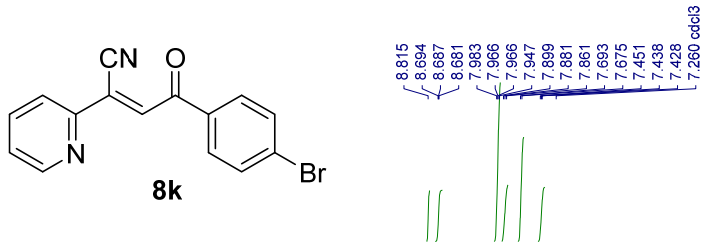

**$^1\text{H}$  NMR spectrum of 8k (400 MHz,  $\text{CDCl}_3$ )**

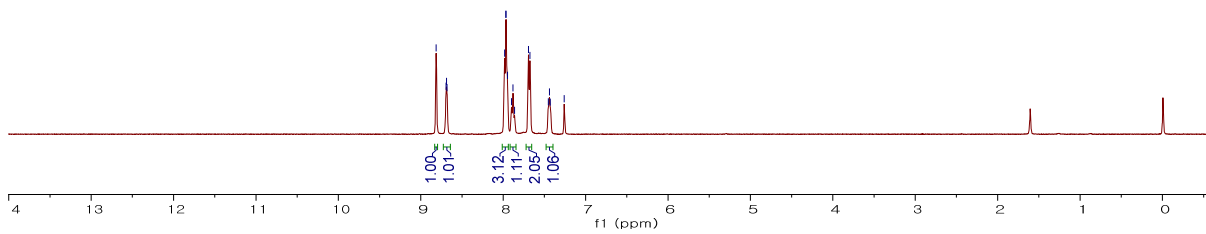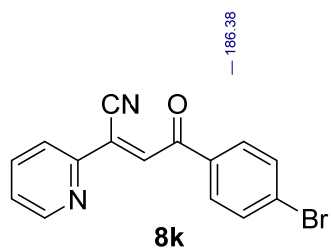

**$^{13}\text{C}\{^1\text{H}\}$  NMR spectrum of 8k (100 MHz,  $\text{CDCl}_3$ )**

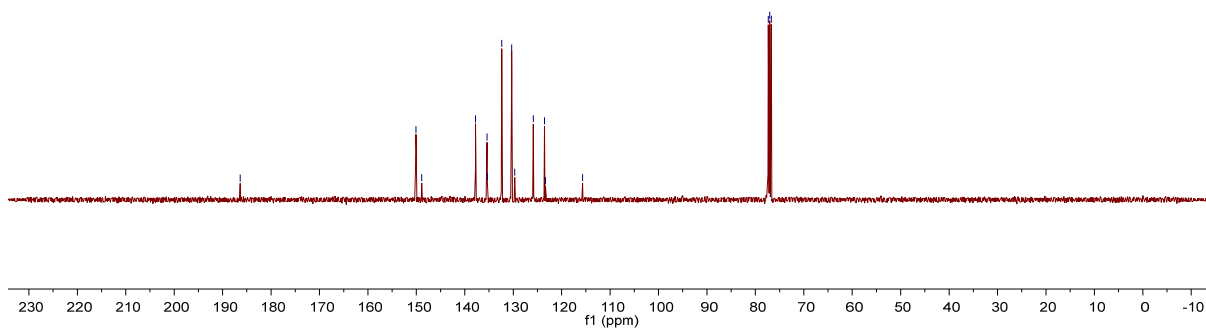

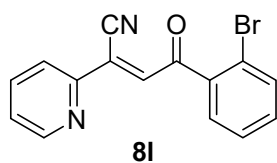

**<sup>1</sup>H NMR spectrum of 8I (400 MHz, CDCl<sub>3</sub>)**

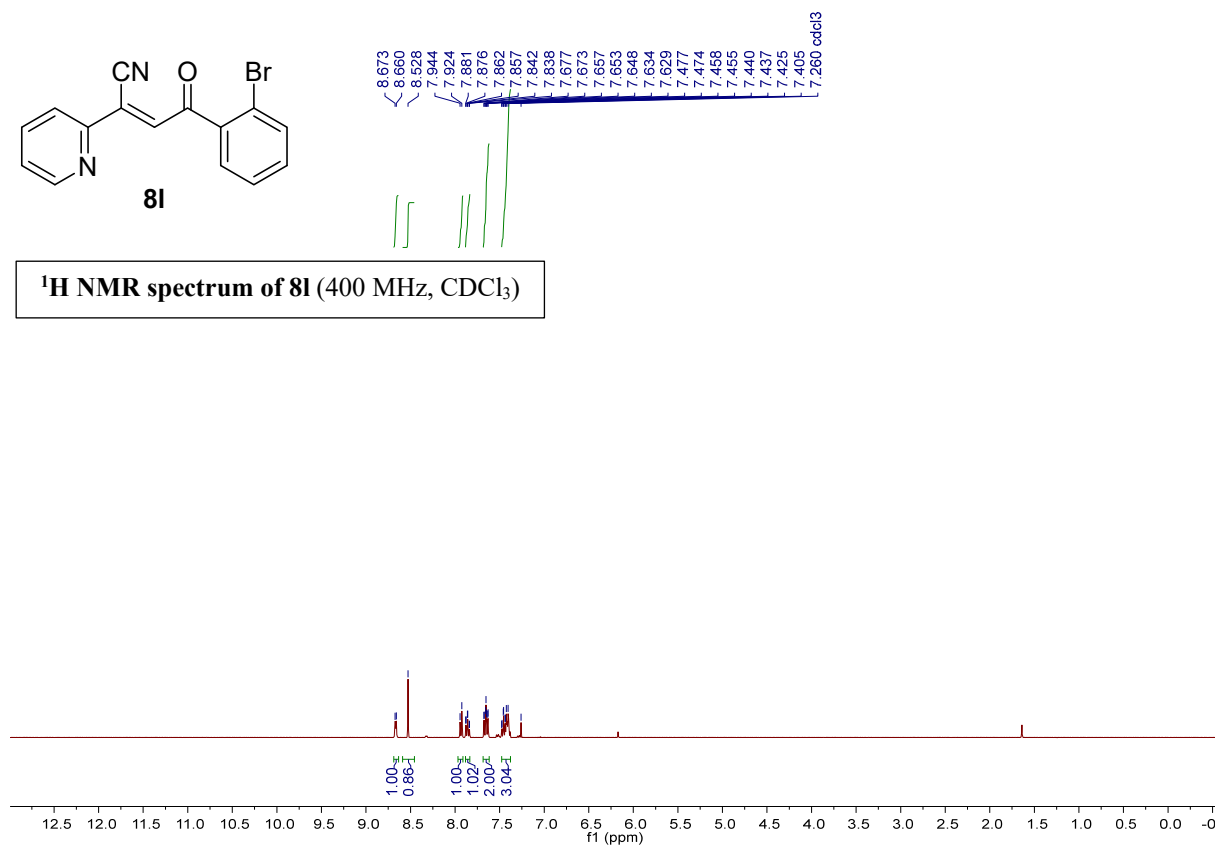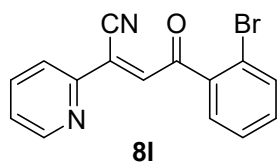

**<sup>13</sup>C{<sup>1</sup>H} NMR spectrum of 8I (100 MHz, CDCl<sub>3</sub>)**

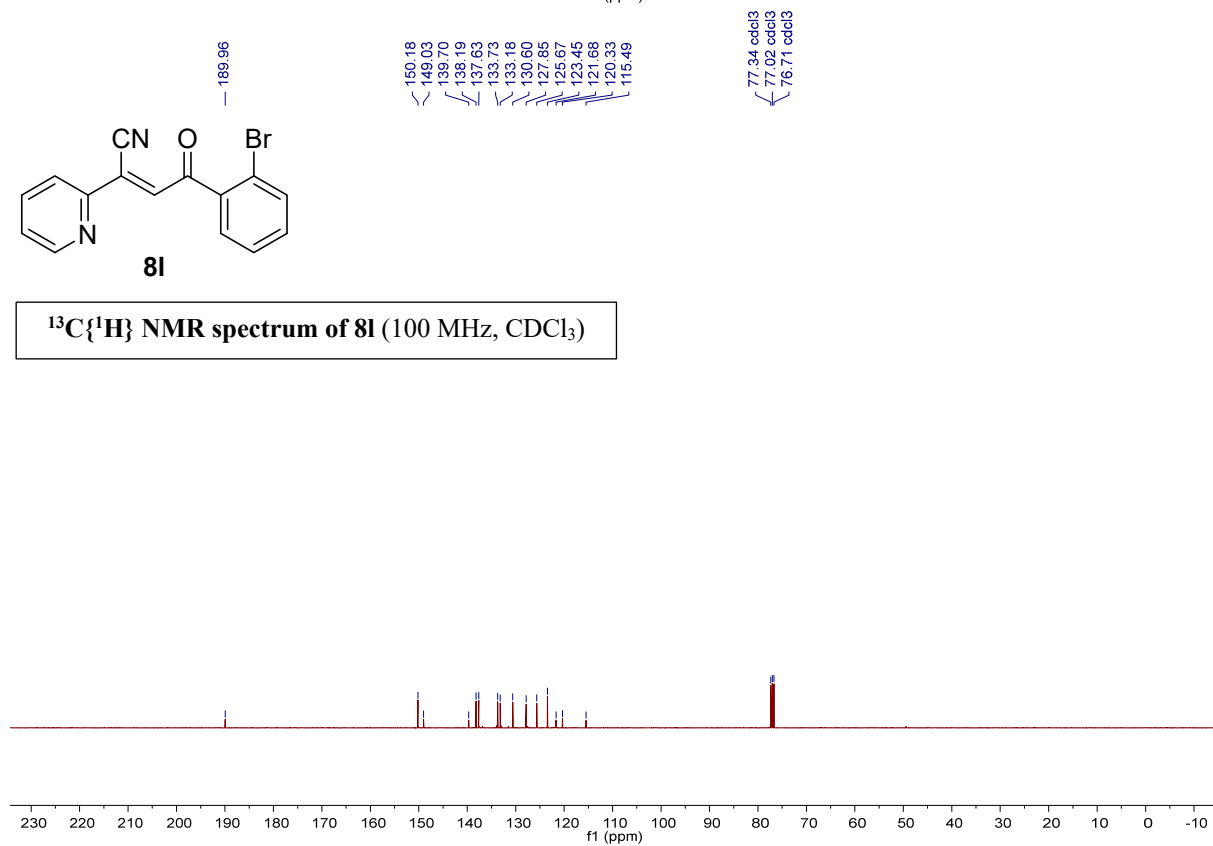

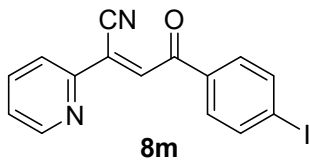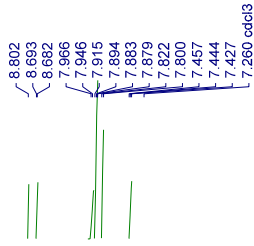

**<sup>1</sup>H NMR spectrum of 8m (400 MHz, CDCl<sub>3</sub>)**

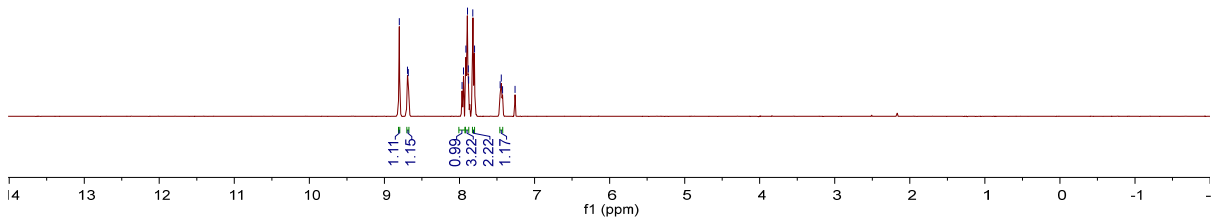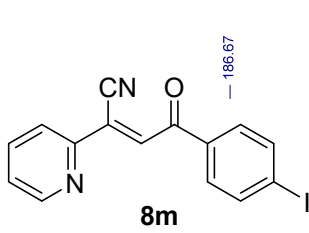

**<sup>13</sup>C{<sup>1</sup>H} NMR spectrum of 8m (100 MHz, CDCl<sub>3</sub>)**

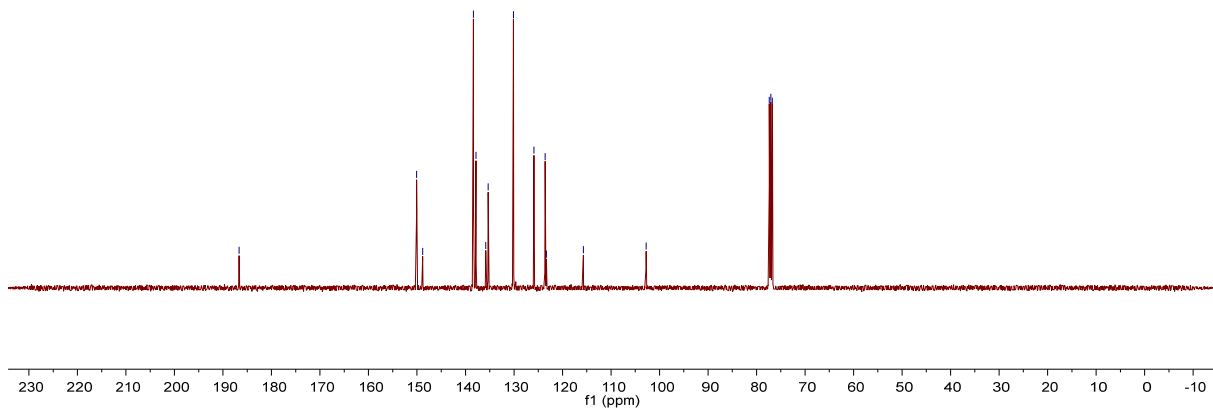

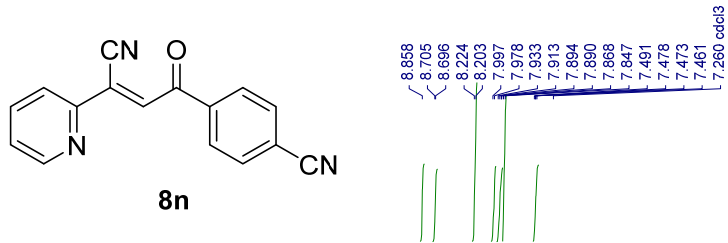

$^1\text{H}$  NMR spectrum of **8n** (400 MHz,  $\text{CDCl}_3$ )

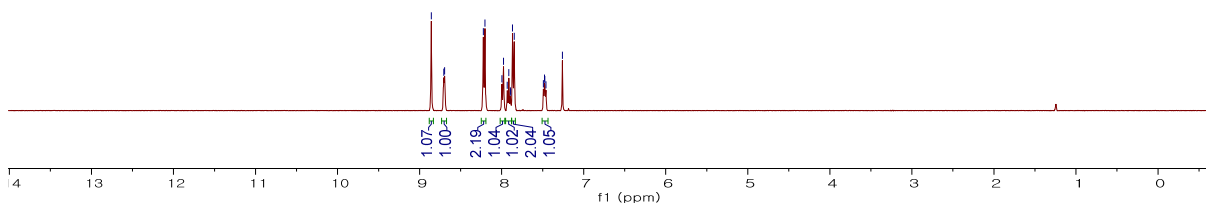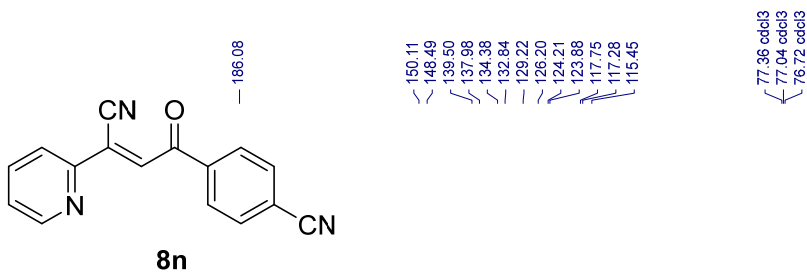

$^{13}\text{C}\{^1\text{H}\}$  NMR spectrum of **8n** (100 MHz,  $\text{CDCl}_3$ )

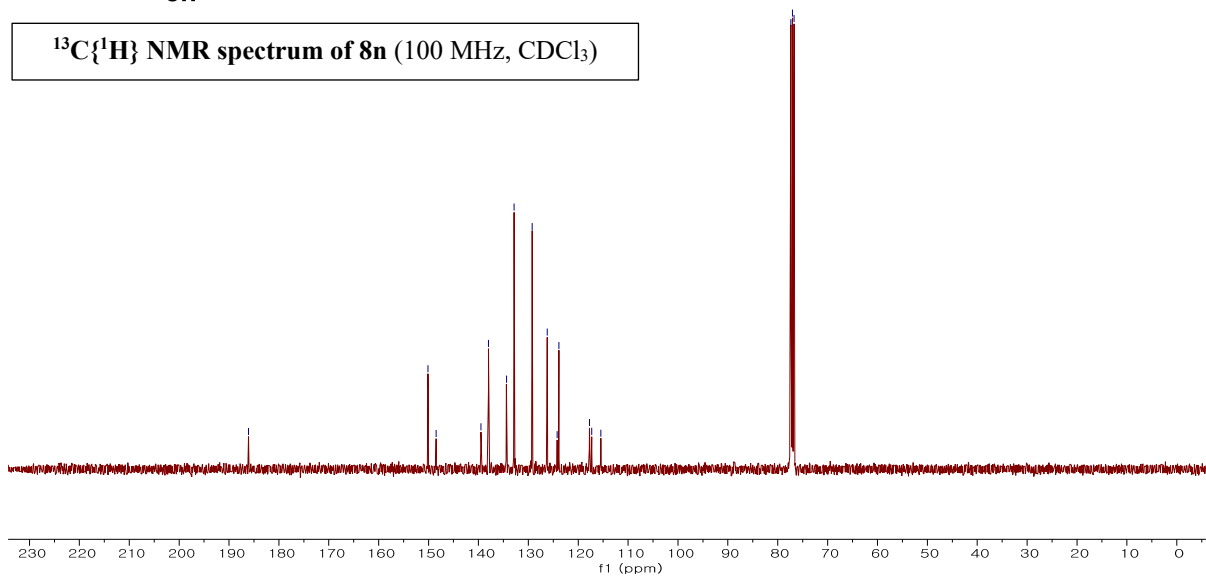

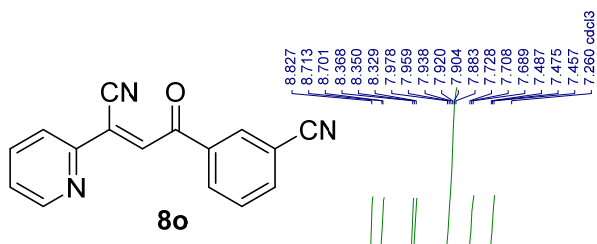

<sup>1</sup>H NMR spectrum of **8o** (400 MHz, CDCl<sub>3</sub>)

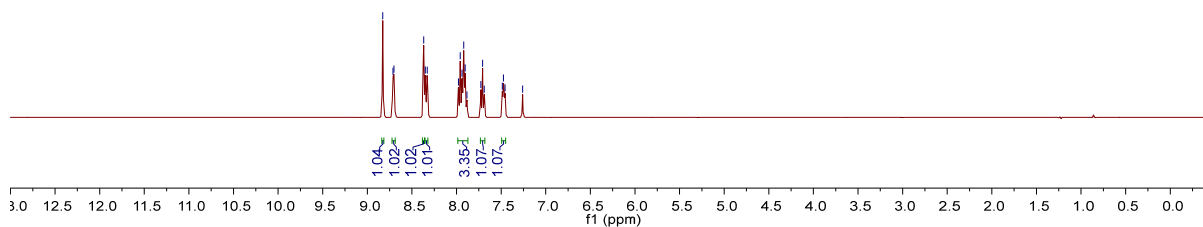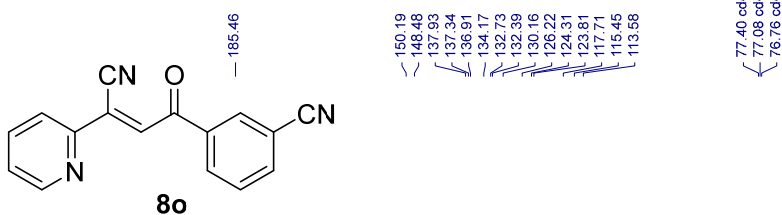

<sup>13</sup>C{<sup>1</sup>H} NMR spectrum of **8o** (100 MHz, CDCl<sub>3</sub>)

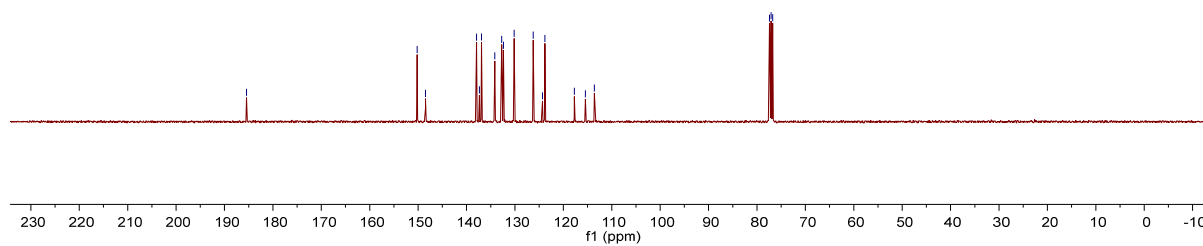

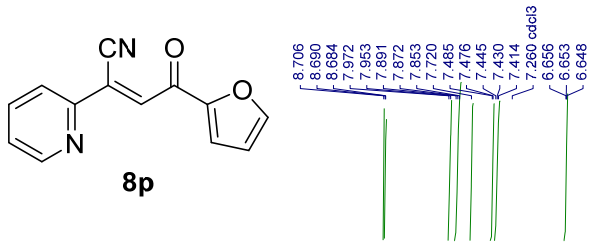

**<sup>1</sup>H NMR spectrum of 8p (400 MHz, CDCl<sub>3</sub>)**

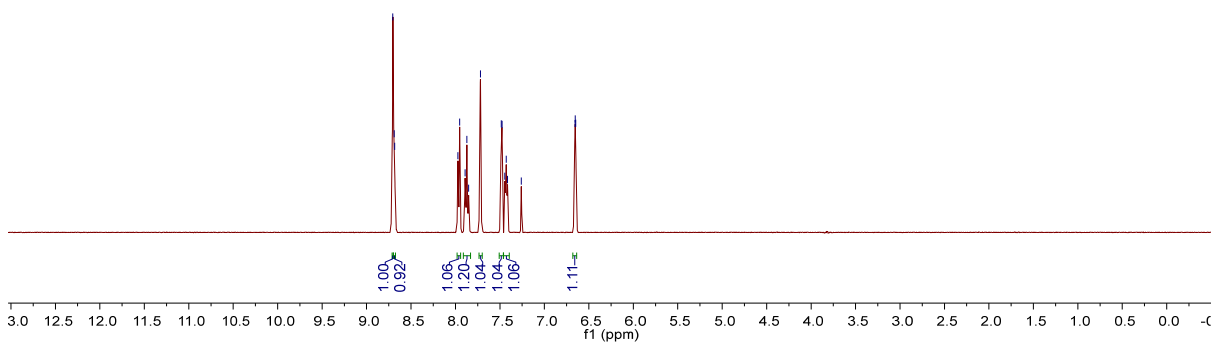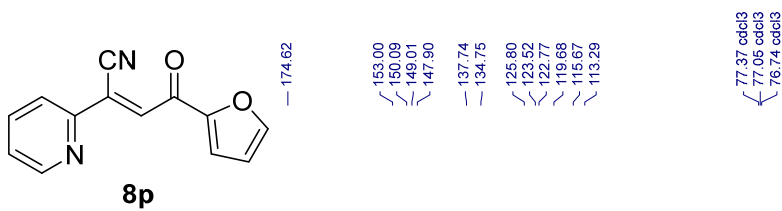

**<sup>13</sup>C{<sup>1</sup>H} NMR spectrum of 8p (100 MHz, CDCl<sub>3</sub>)**

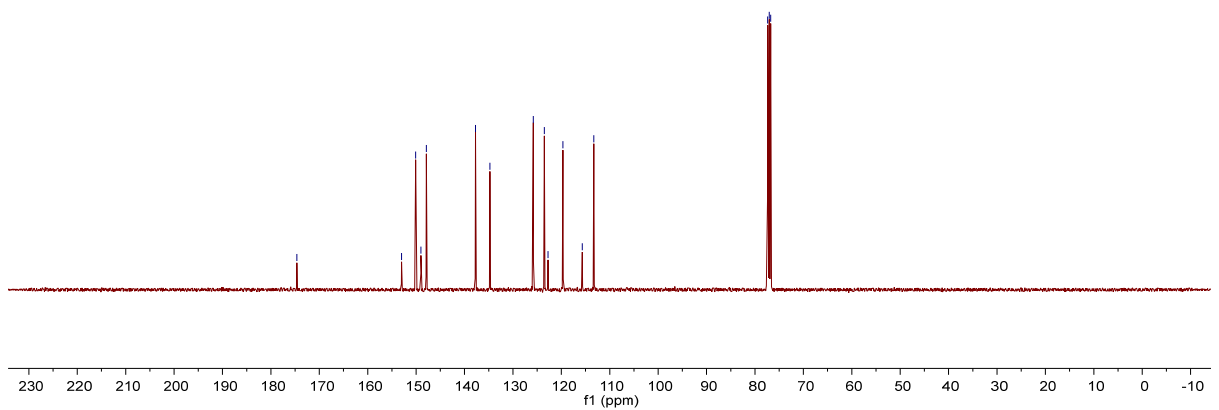



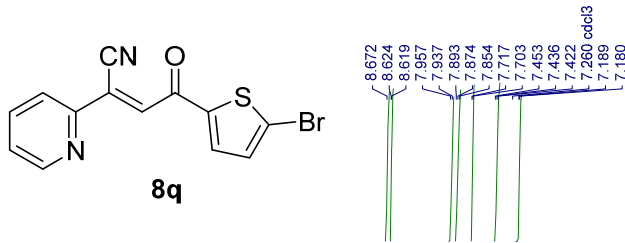

**$^1\text{H}$  NMR spectrum of **8q** (400 MHz,  $\text{CDCl}_3$ )**

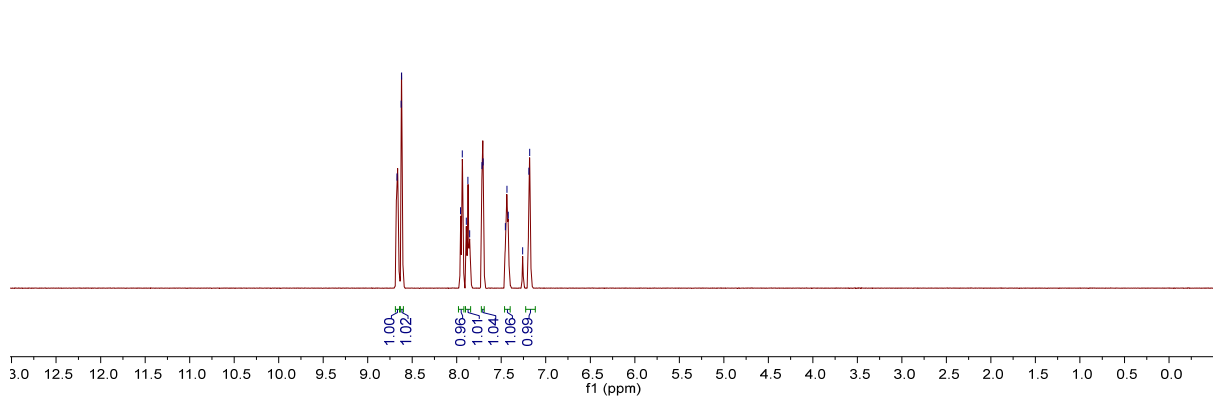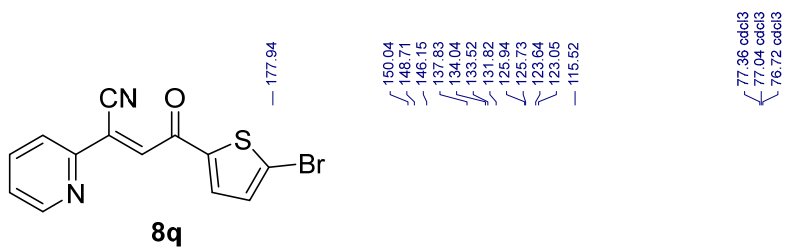

**$^{13}\text{C}\{^1\text{H}\}$  NMR spectrum of **8q** (100 MHz,  $\text{CDCl}_3$ )**

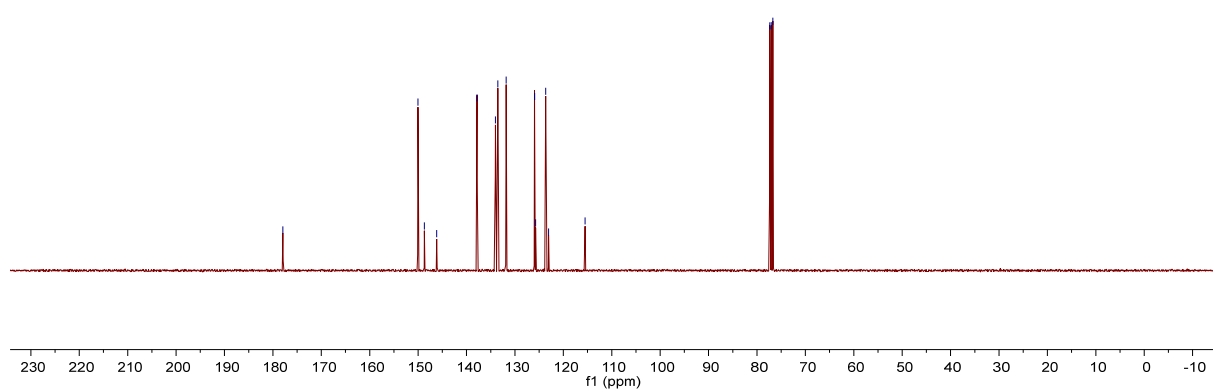

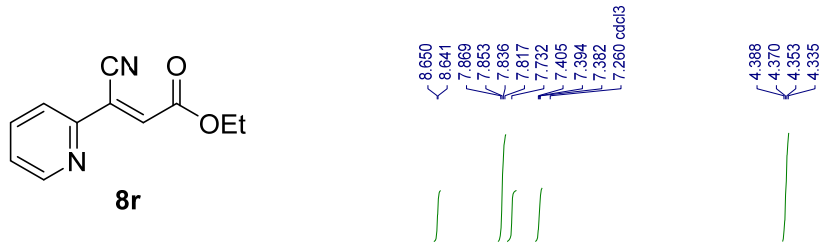

<sup>1</sup>H NMR spectrum of **8r** (400 MHz, CDCl<sub>3</sub>)

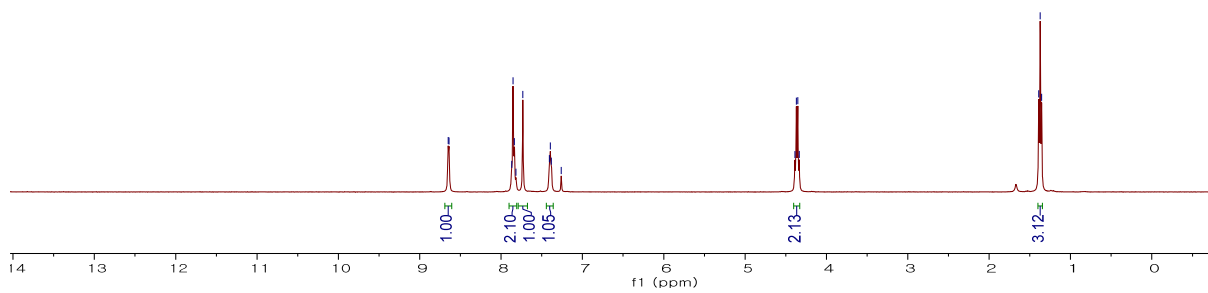

<sup>13</sup>C{<sup>1</sup>H} NMR spectrum of **8r** (100 MHz, CDCl<sub>3</sub>)

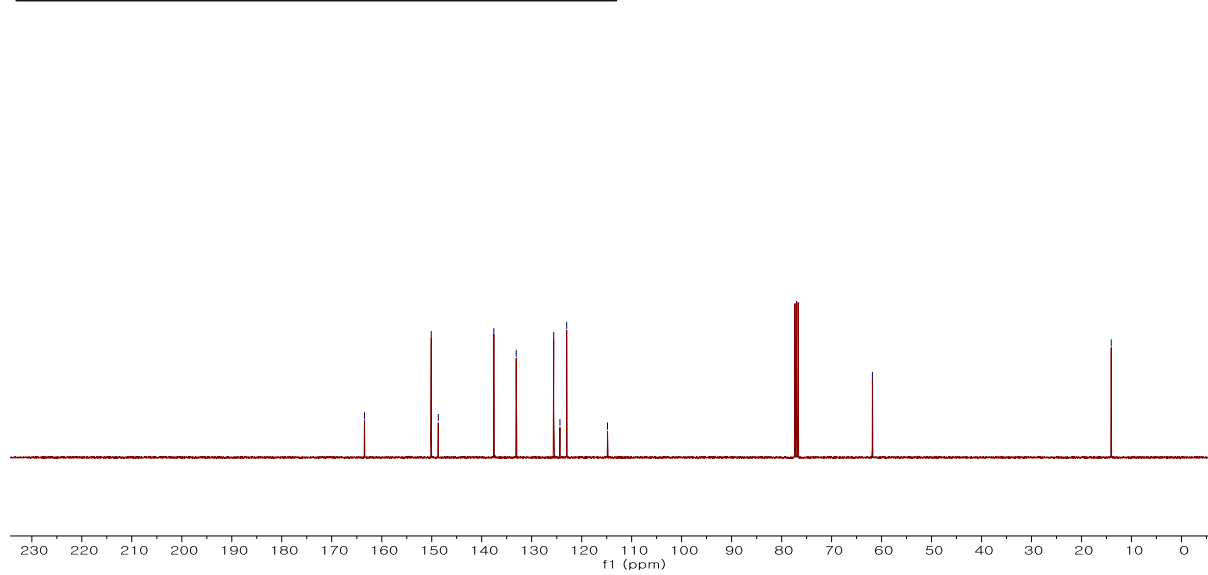

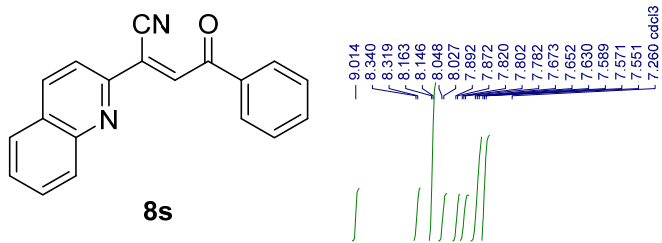

$^1\text{H}$  NMR spectrum of **8s** (400 MHz,  $\text{CDCl}_3$ )

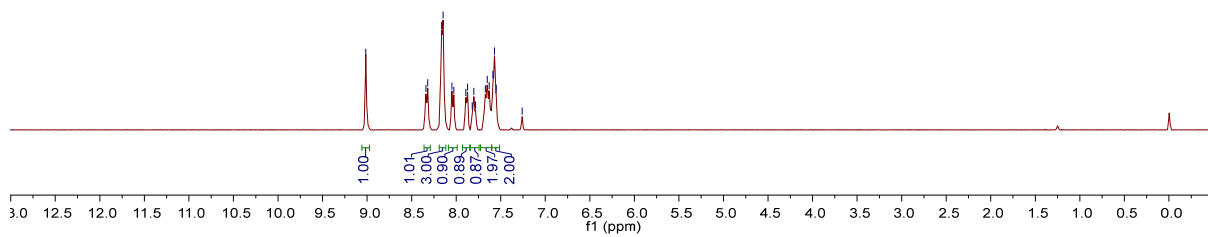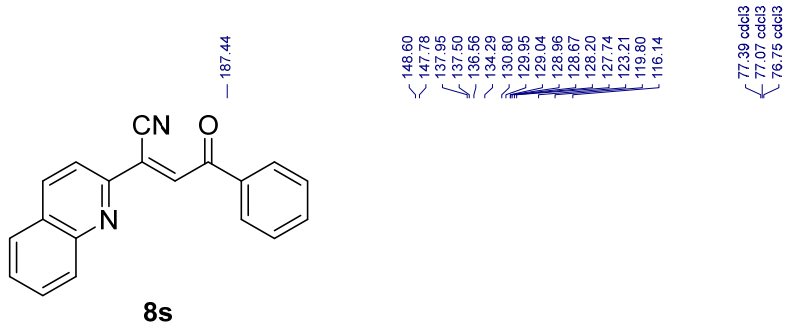

$^{13}\text{C}\{^1\text{H}\}$  NMR spectrum of **8s** (100 MHz,  $\text{CDCl}_3$ )

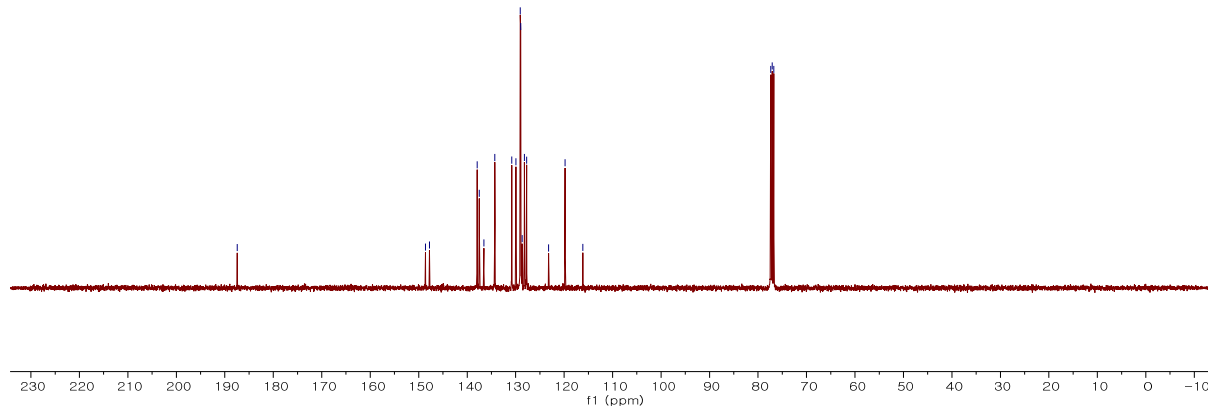

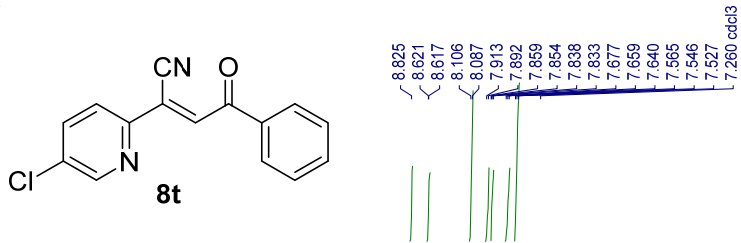

<sup>1</sup>H NMR spectrum of **8t** (400 MHz, CDCl<sub>3</sub>)

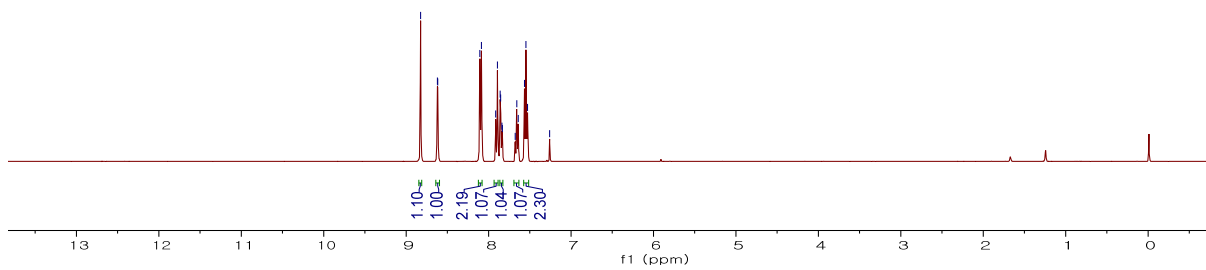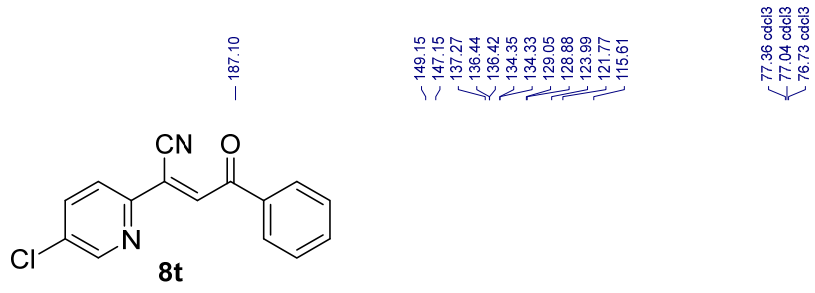

<sup>13</sup>C{<sup>1</sup>H} NMR spectrum of **8t** (100 MHz, CDCl<sub>3</sub>)

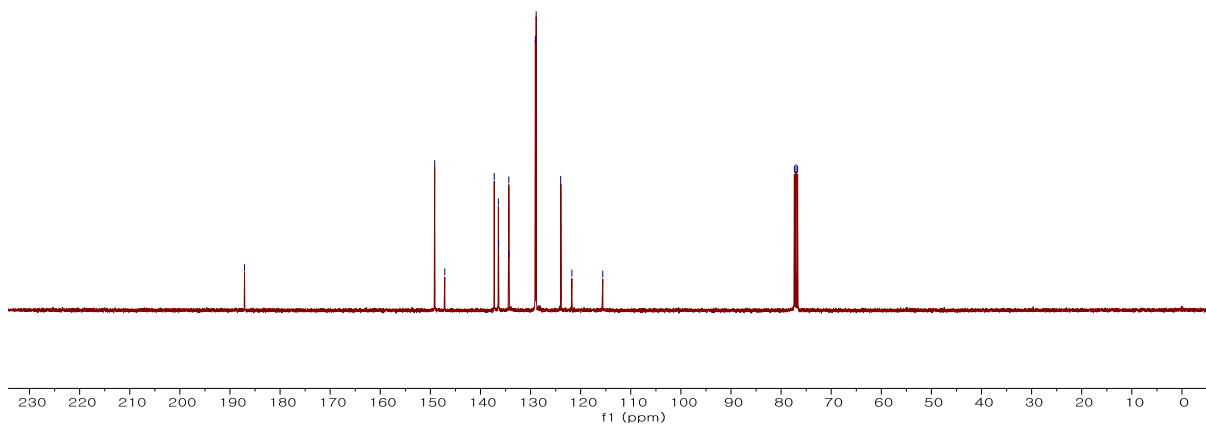

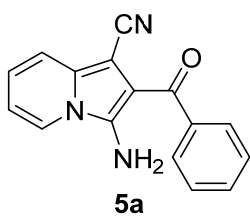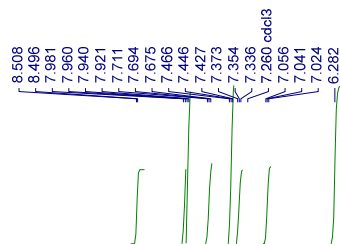

**$^1\text{H}$  NMR spectrum of 5a (400 MHz,  $\text{CDCl}_3$ )**

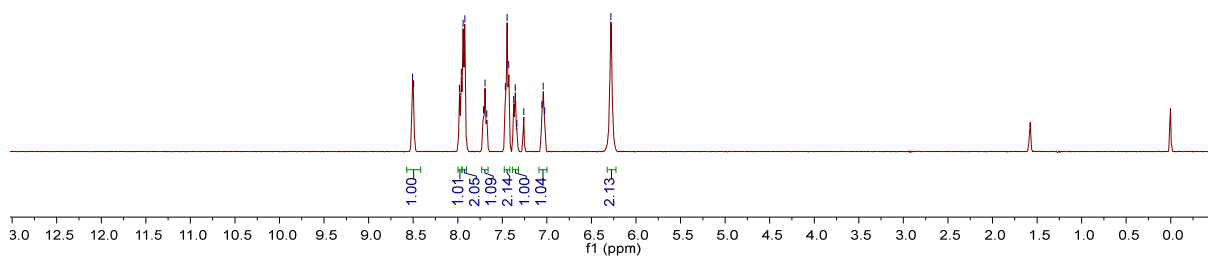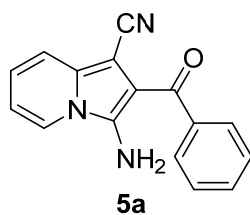

**$^{13}\text{C}\{^1\text{H}\}$  NMR spectrum of 5a (100 MHz,  $\text{CDCl}_3$ )**

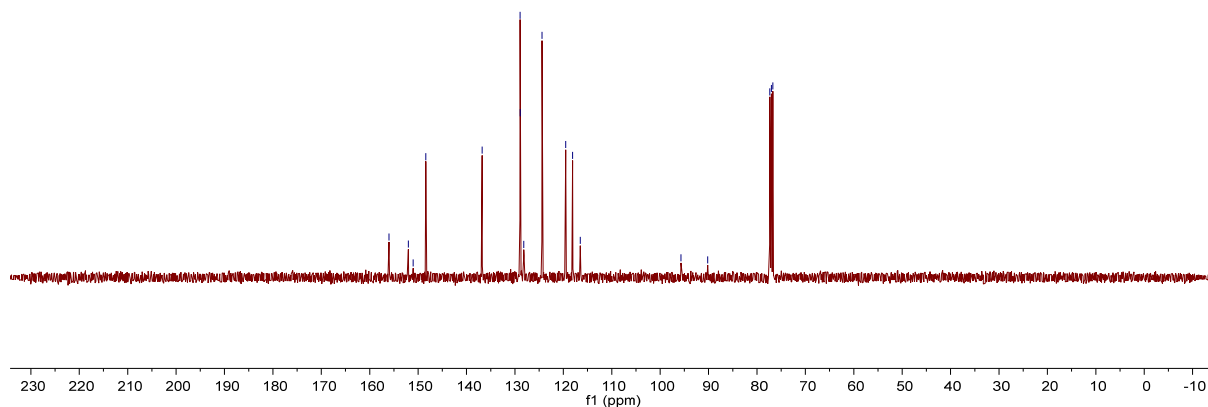

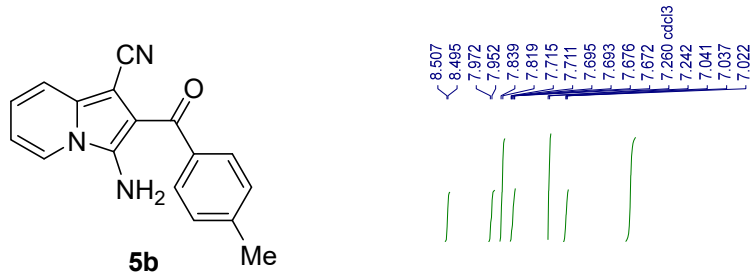

$^1\text{H}$  NMR spectrum of **5b** (400 MHz,  $\text{CDCl}_3$ )

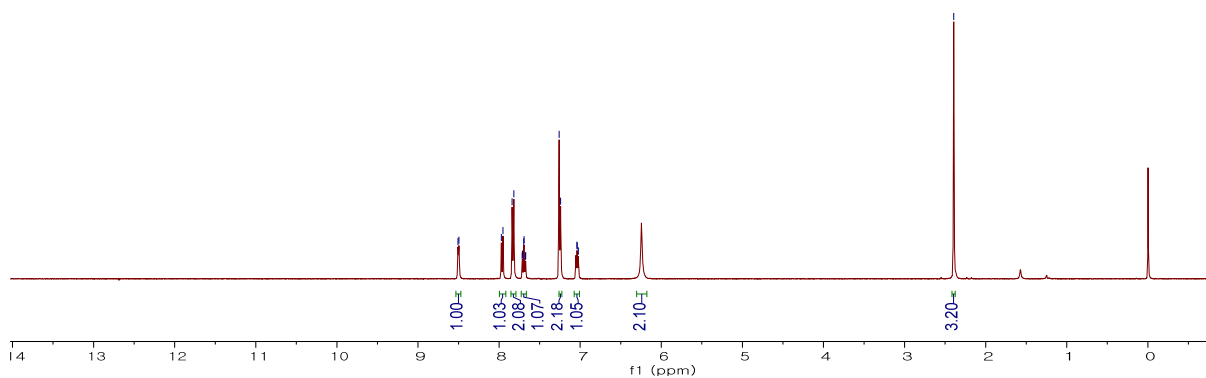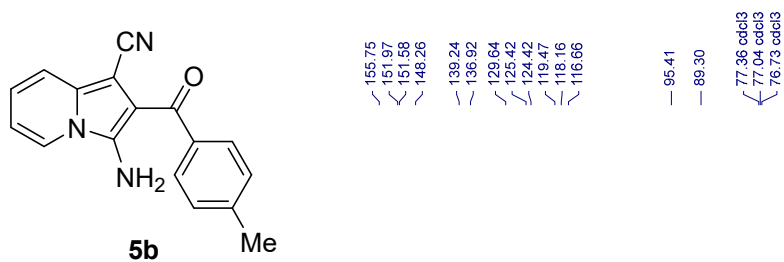

$^{13}\text{C}\{^1\text{H}\}$  NMR spectrum of **5b** (100 MHz,  $\text{CDCl}_3$ )

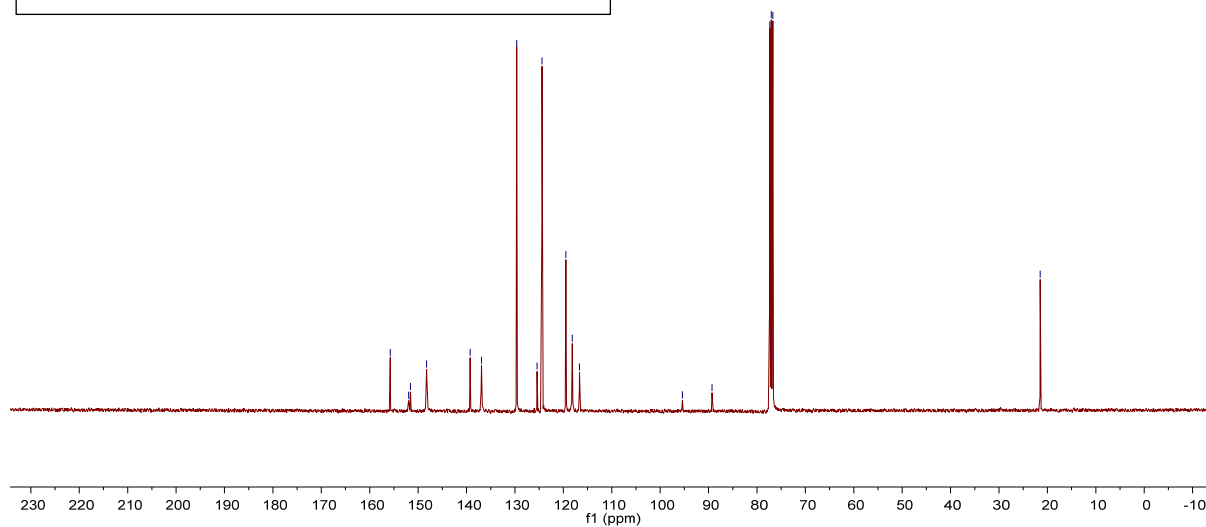

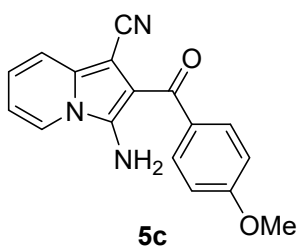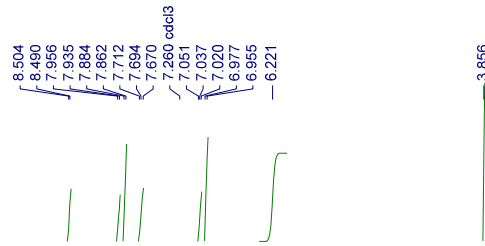

<sup>1</sup>H NMR spectrum of 5c (400 MHz, CDCl<sub>3</sub>)

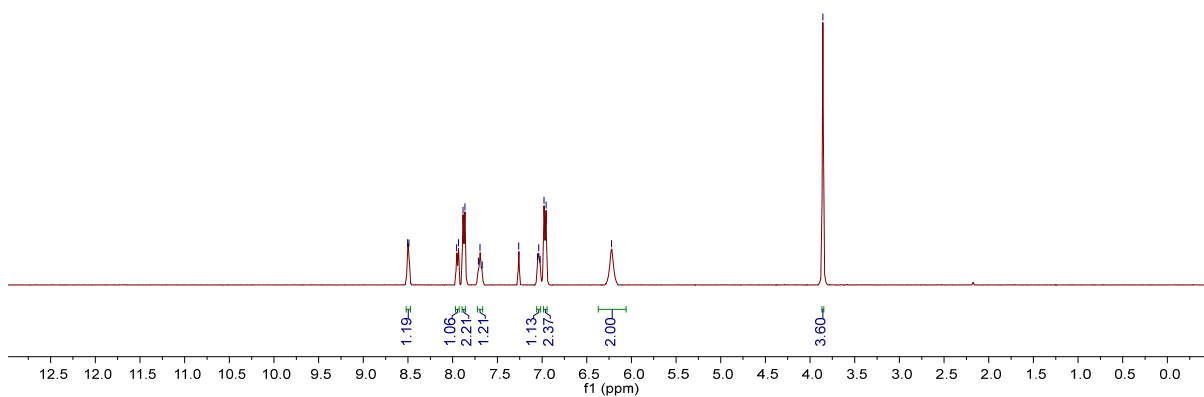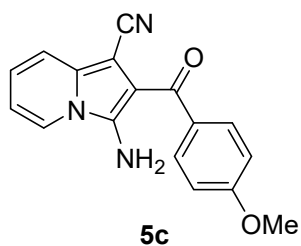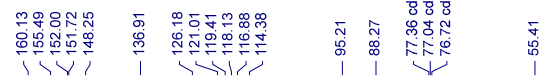

<sup>13</sup>C{<sup>1</sup>H} NMR spectrum of 5c (100 MHz, CDCl<sub>3</sub>)

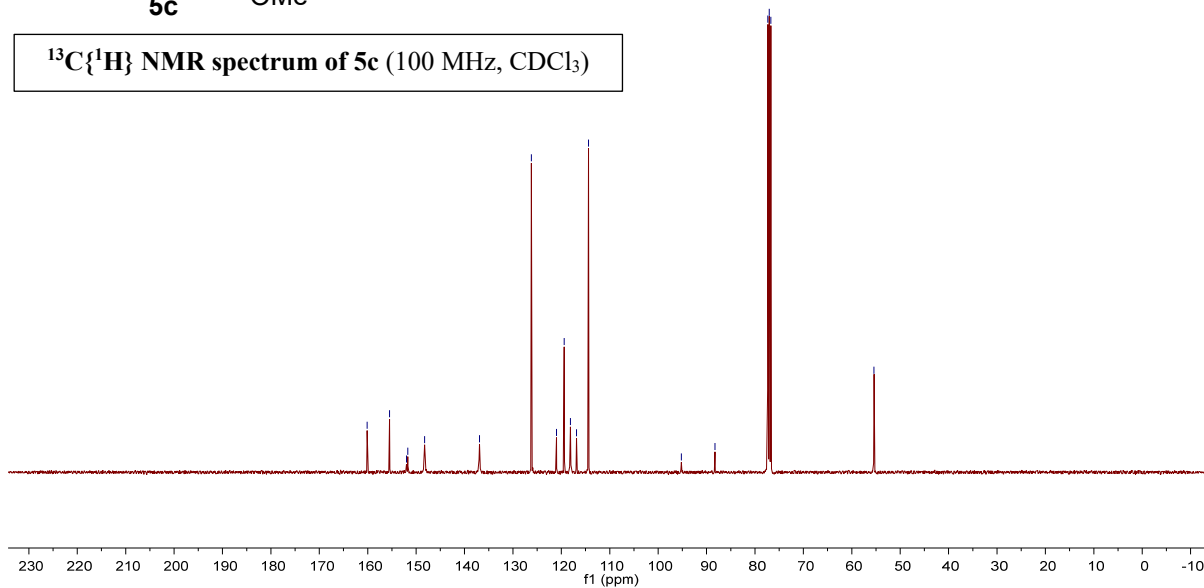

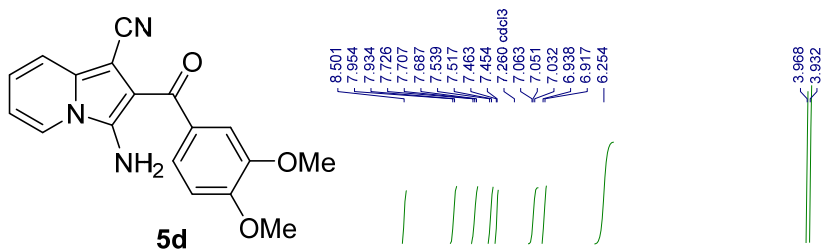

$^1\text{H}$  NMR spectrum of **5d** (400 MHz,  $\text{CDCl}_3$ )

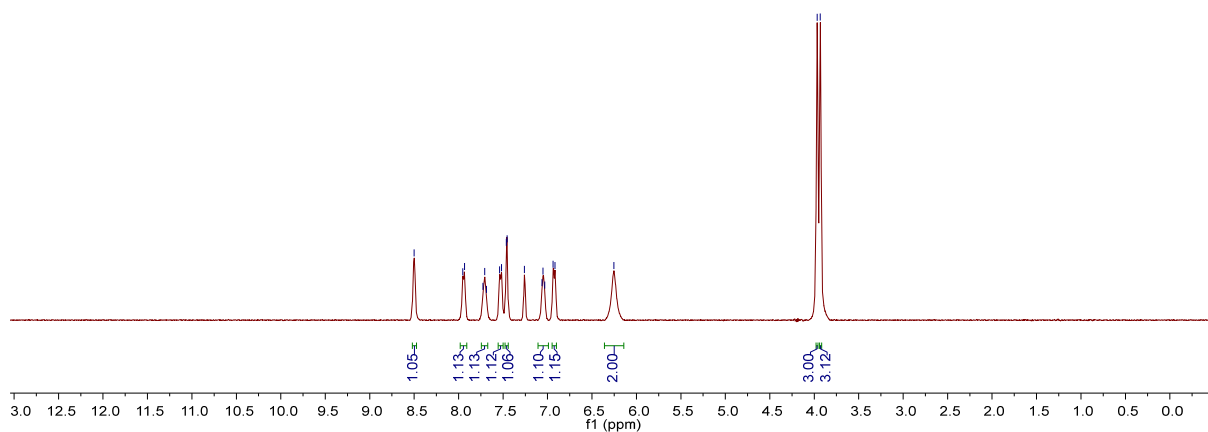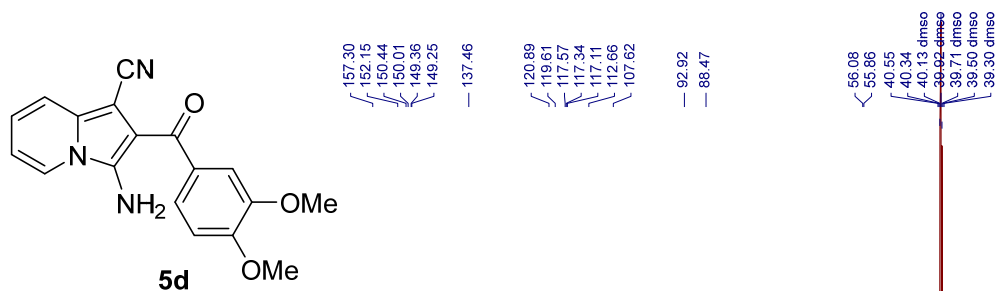

$^{13}\text{C}\{^1\text{H}\}$  NMR spectrum of **5d** (100 MHz,  $\text{DMSO-d}_6$ )

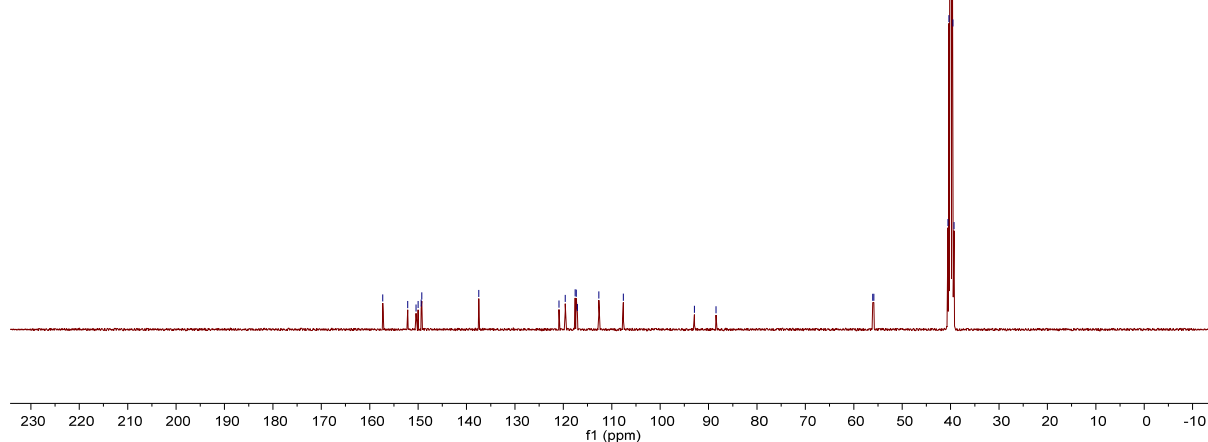



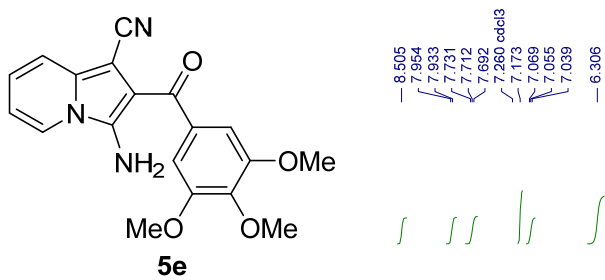

<sup>1</sup>H NMR spectrum of **5e** (400 MHz, CDCl<sub>3</sub>)

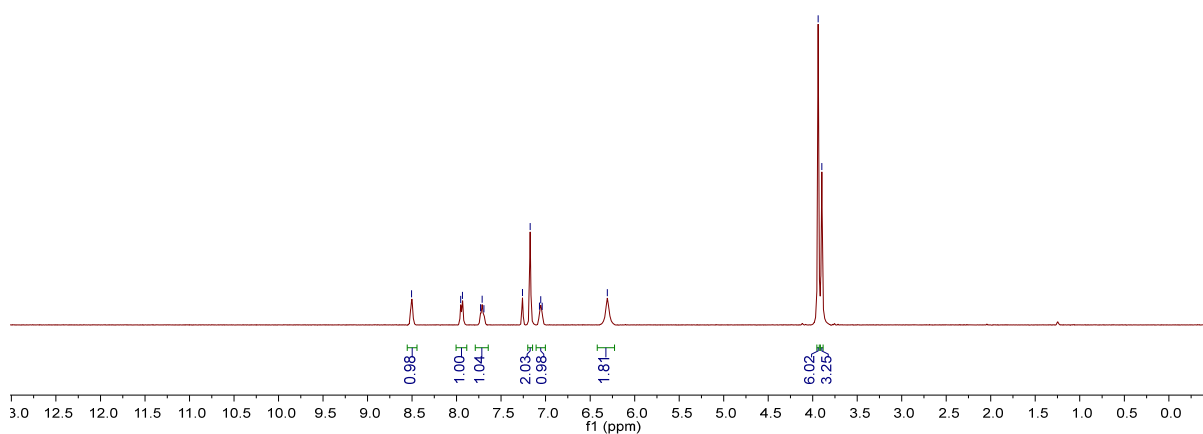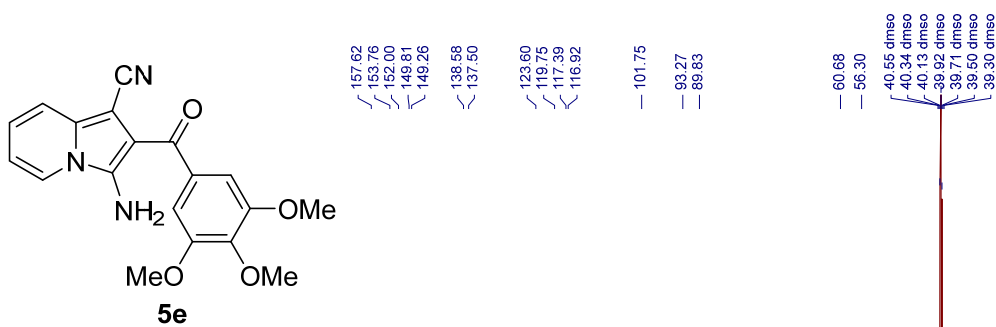

<sup>13</sup>C{<sup>1</sup>H} NMR spectrum of **5e** (100 MHz, DMSO-d<sub>6</sub>)

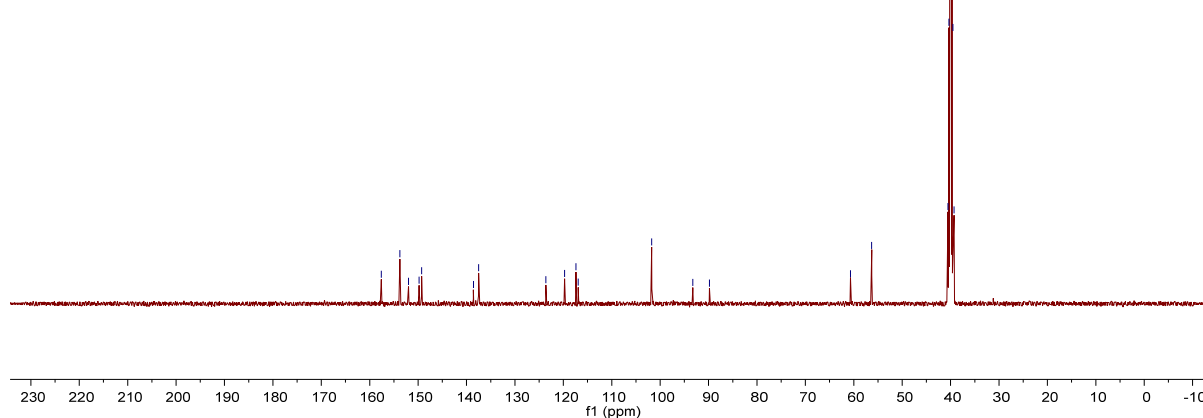

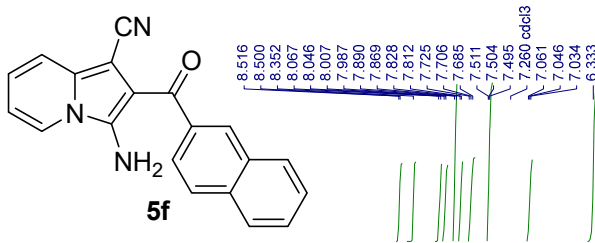

$^1\text{H}$  NMR spectrum of **5f** (400 MHz,  $\text{CDCl}_3$ )

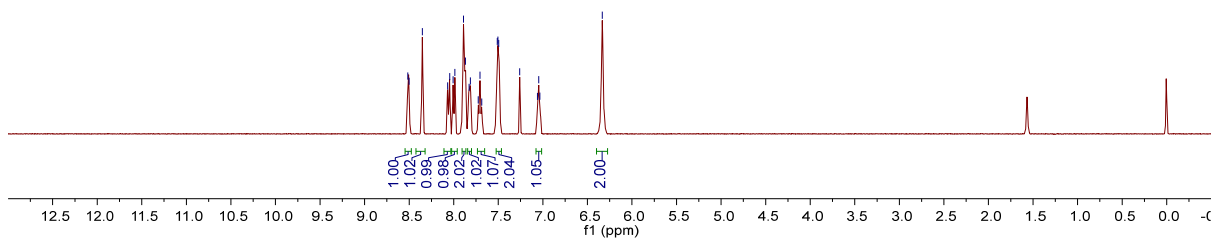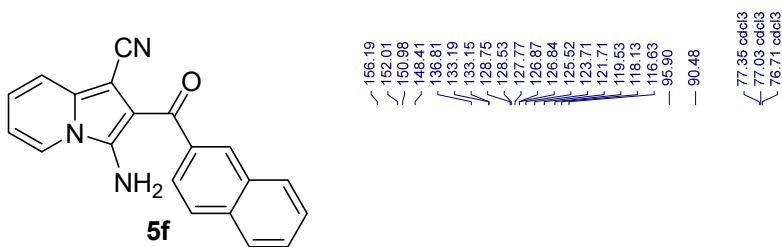

$^{13}\text{C}\{^1\text{H}\}$  NMR spectrum of **5f** (100 MHz,  $\text{CDCl}_3$ )

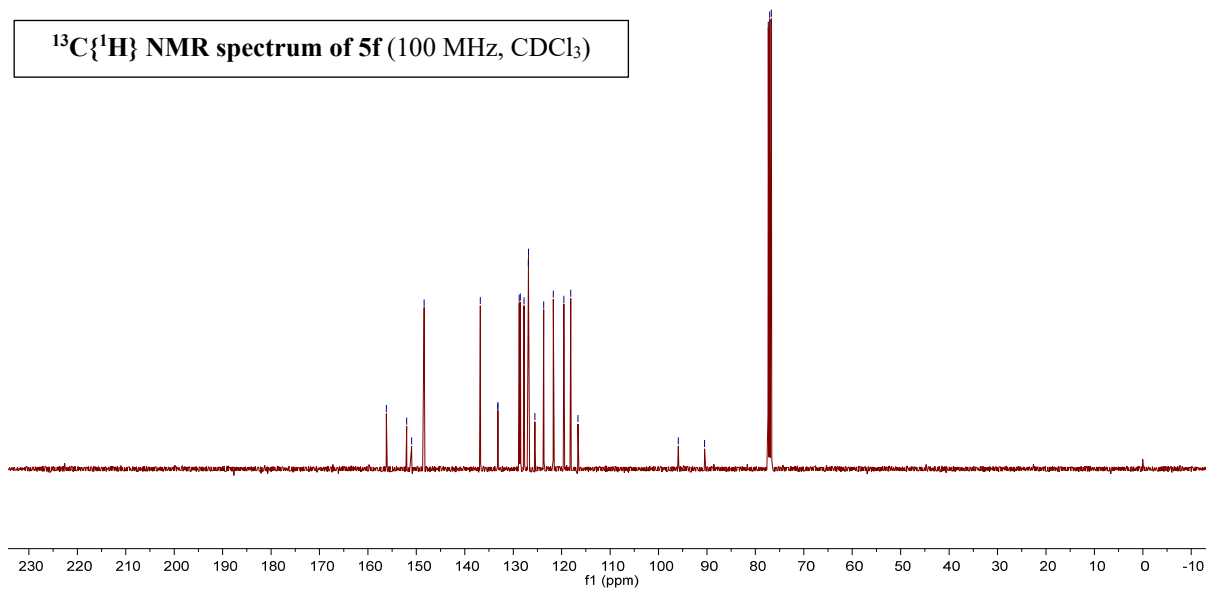

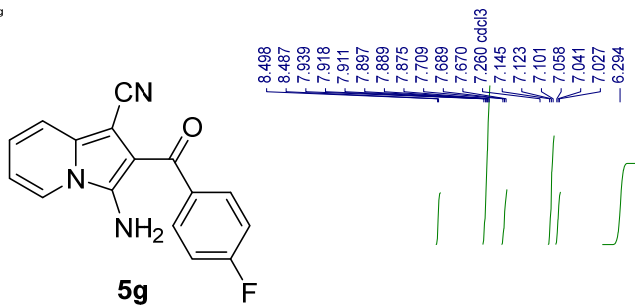

**<sup>1</sup>H NMR spectrum of 5g (400 MHz, CDCl<sub>3</sub>)**

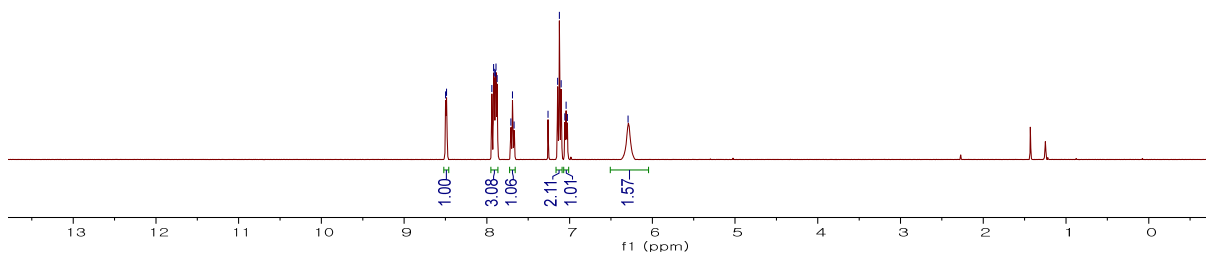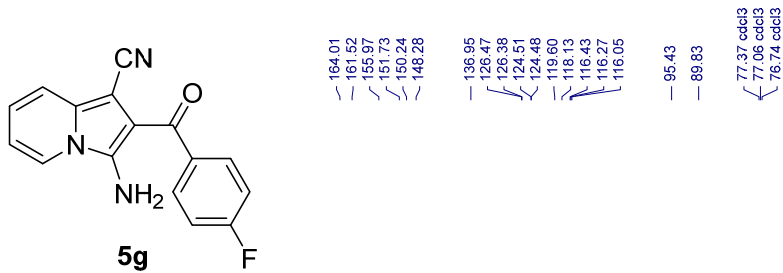

**<sup>13</sup>C{<sup>1</sup>H} NMR spectrum of 5g (100 MHz, CDCl<sub>3</sub>)**

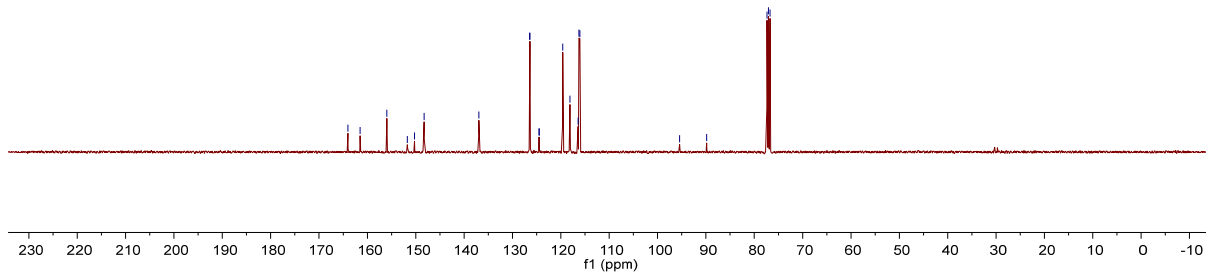

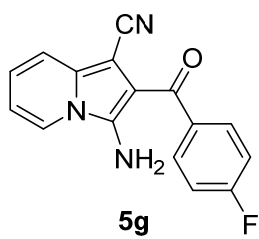

**<sup>19</sup>F NMR spectrum of 5g (376 MHz, CDCl<sub>3</sub>)**

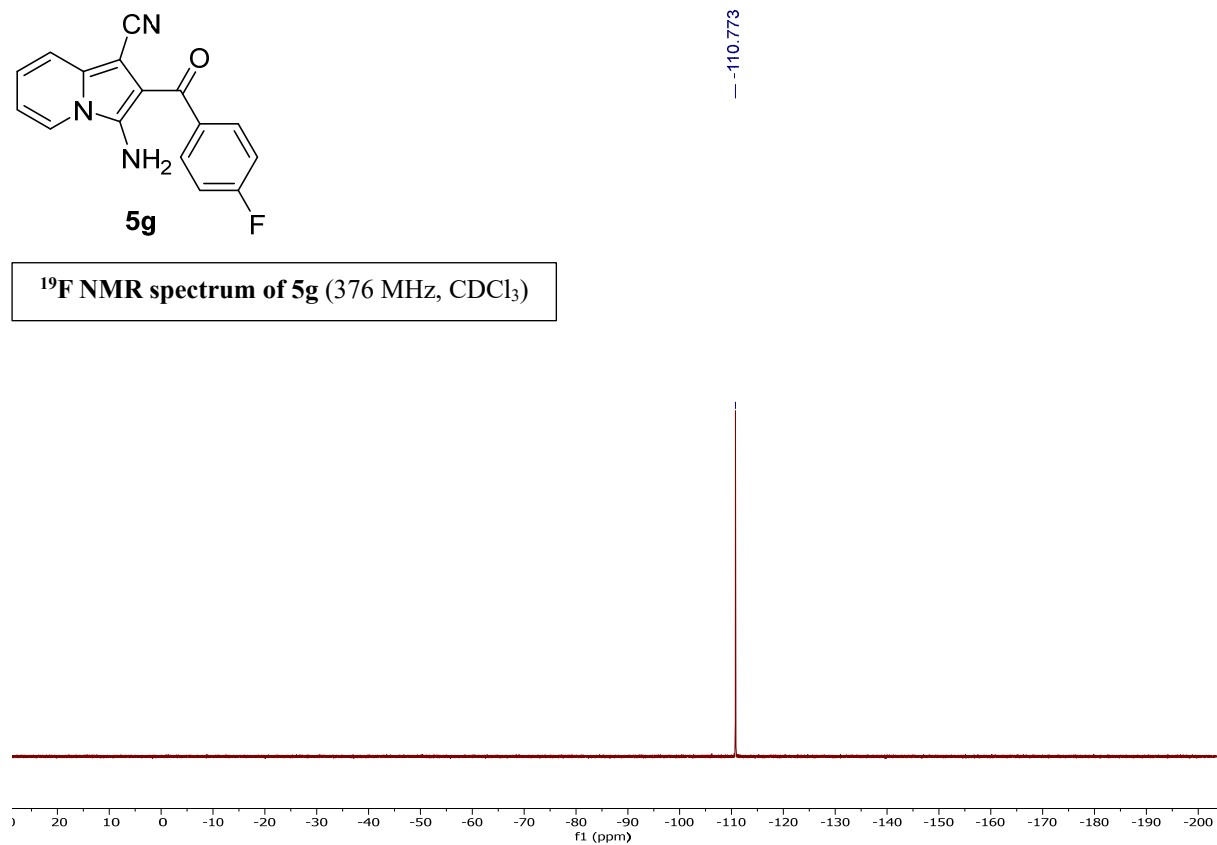

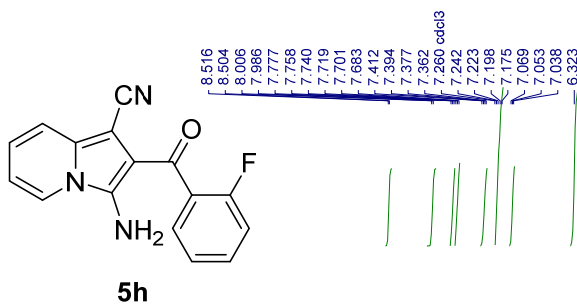

$^1\text{H}$  NMR spectrum of **5h** (400 MHz,  $\text{CDCl}_3$ )

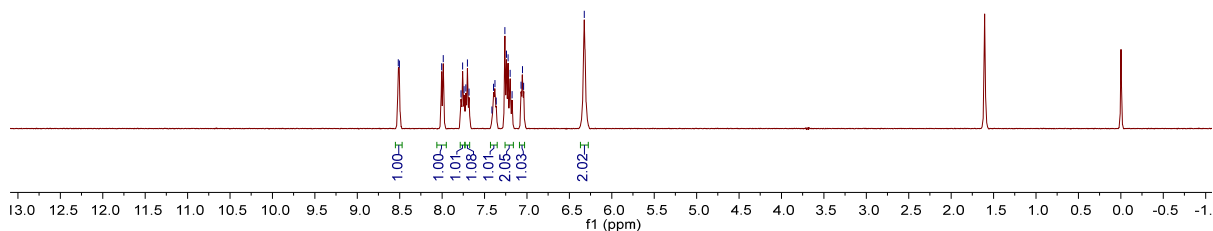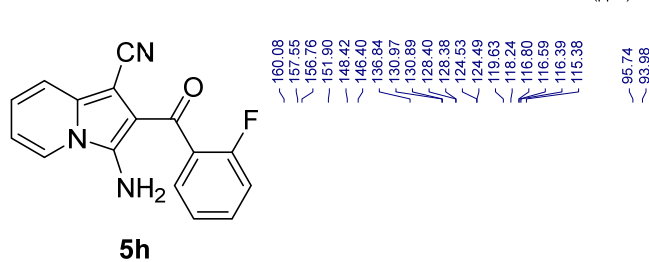

$^{13}\text{C}\{^1\text{H}\}$  NMR spectrum of **5h** (100 MHz,  $\text{CDCl}_3$ )

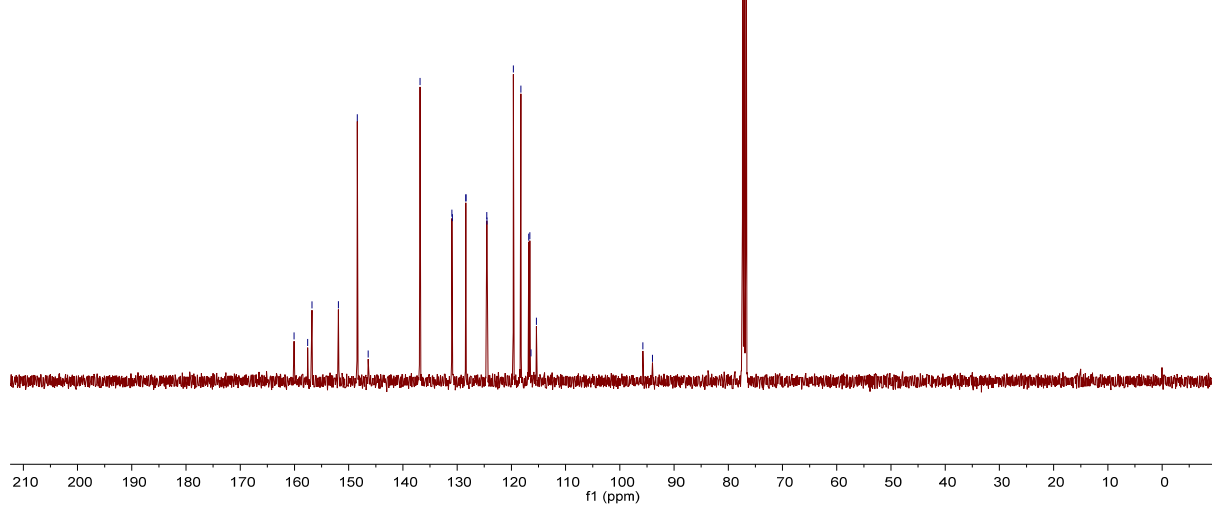

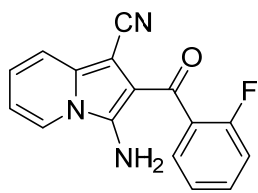

**5h**

**<sup>19</sup>F NMR spectrum of 5h (376 MHz, CDCl<sub>3</sub>)**

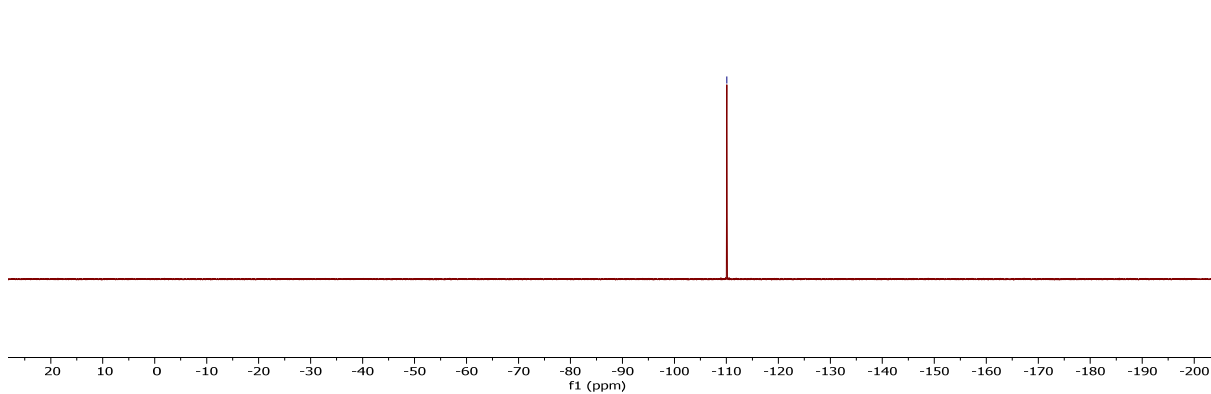

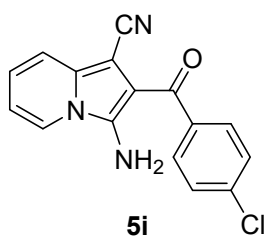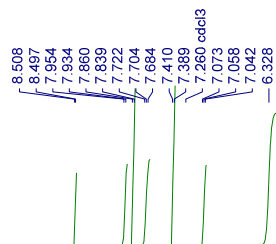

<sup>1</sup>H NMR spectrum of **5i** (400 MHz, CDCl<sub>3</sub>)

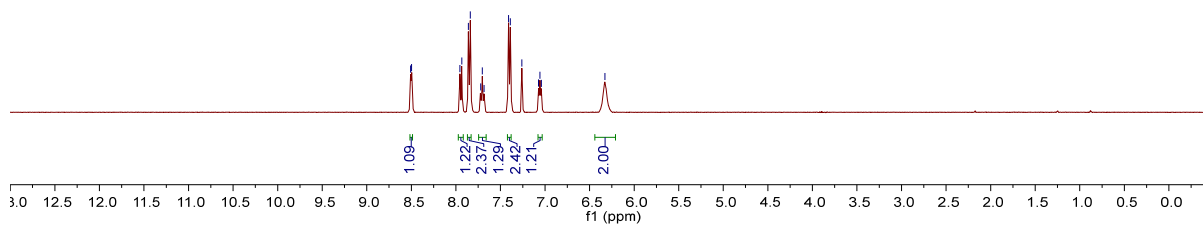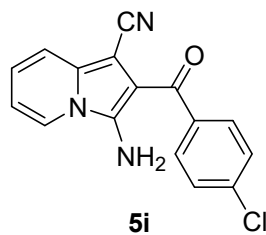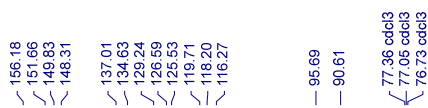

<sup>13</sup>C{<sup>1</sup>H} NMR spectrum of **5i** (100 MHz, CDCl<sub>3</sub>)

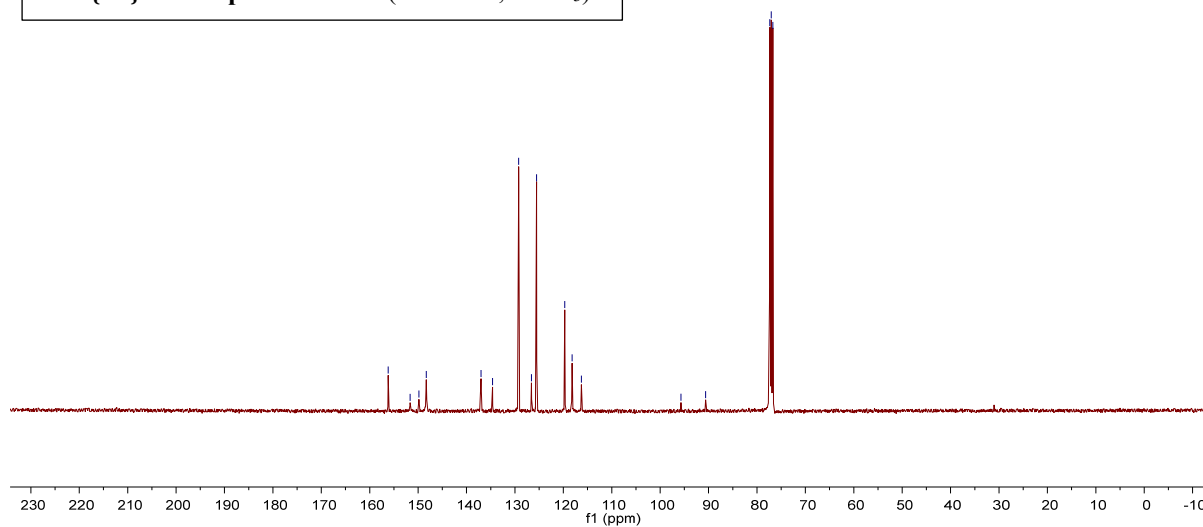

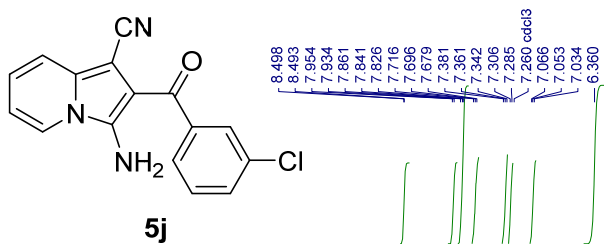

$^1\text{H}$  NMR spectrum of **5j** (400 MHz,  $\text{CDCl}_3$ )

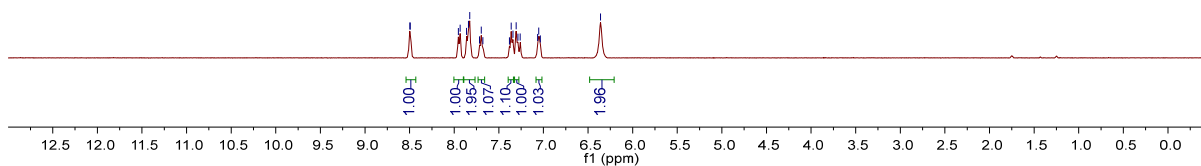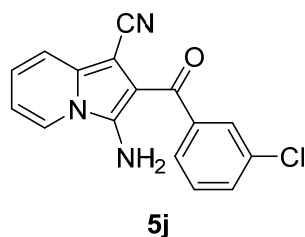

**5j**

$^{13}\text{C}\{^1\text{H}\}$  NMR spectrum of **5j** (100 MHz,  $\text{CDCl}_3$ )

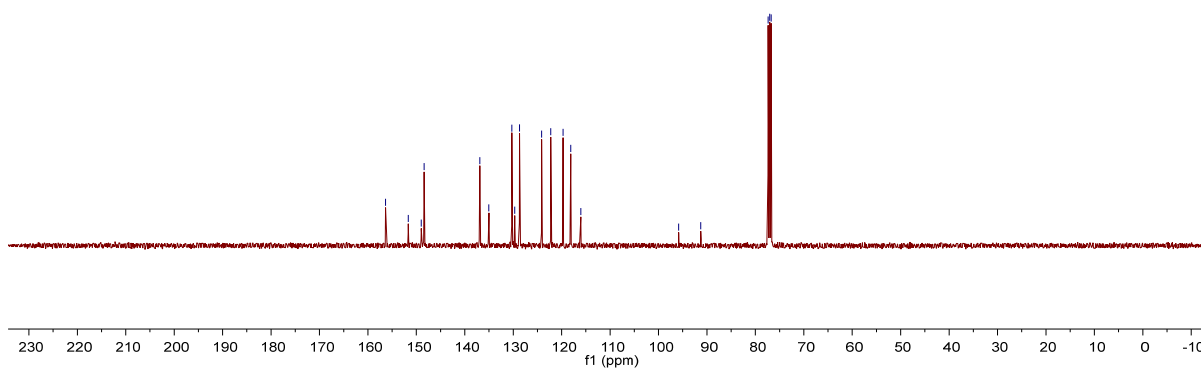



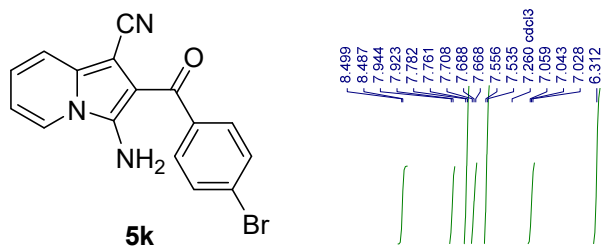

**<sup>1</sup>H NMR spectrum of 5k (400 MHz, CDCl<sub>3</sub>)**

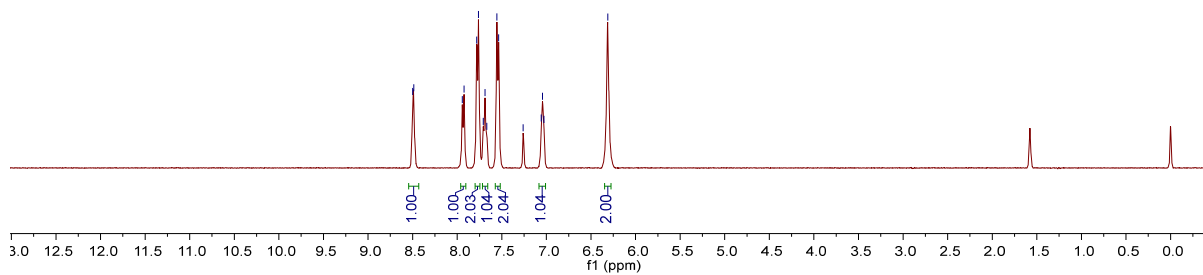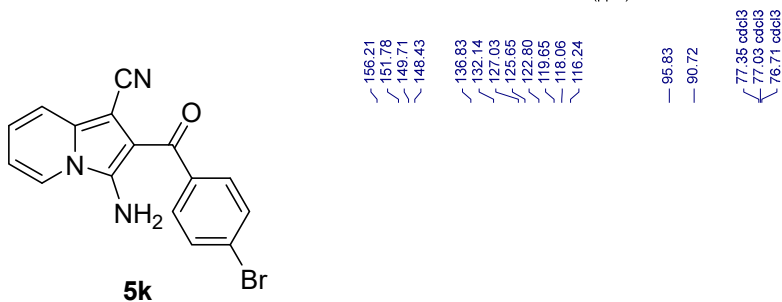

**<sup>13</sup>C{<sup>1</sup>H} NMR spectrum of 5k (100 MHz, CDCl<sub>3</sub>)**

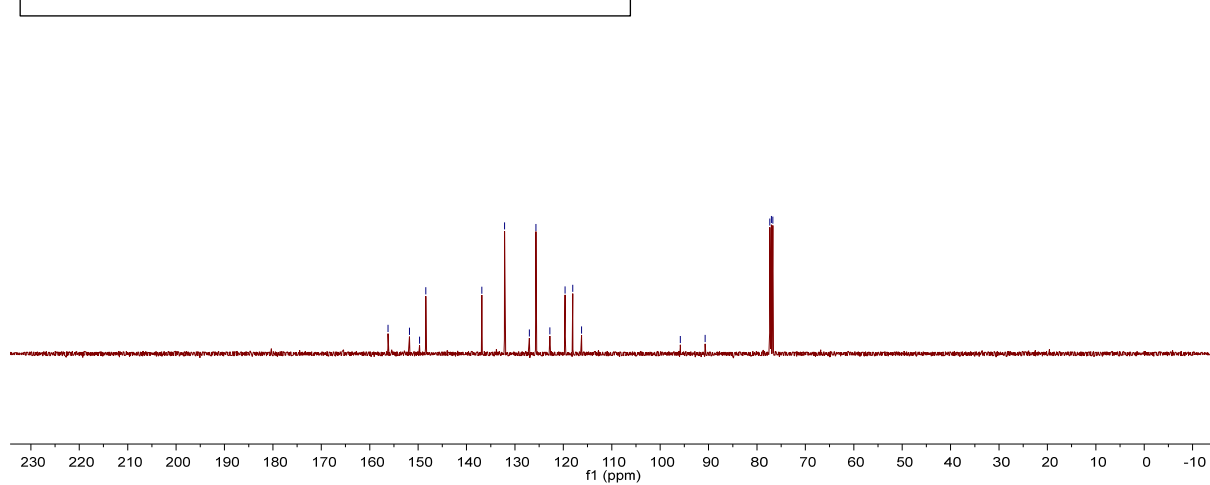

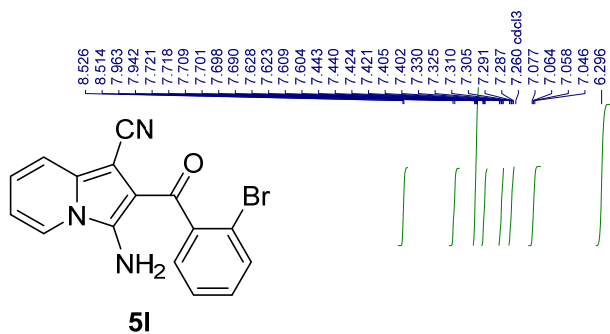

**<sup>1</sup>H NMR spectrum of 5I (400 MHz, CDCl<sub>3</sub>)**

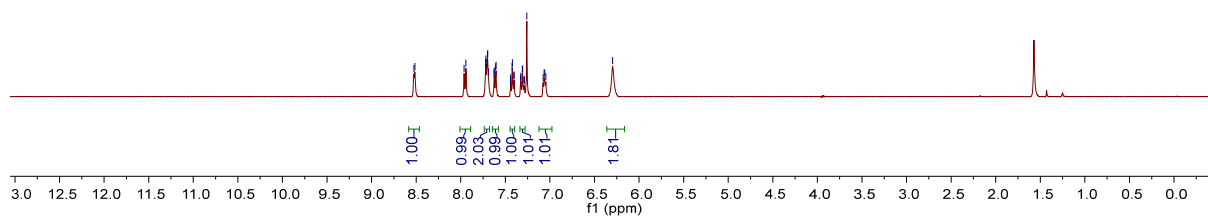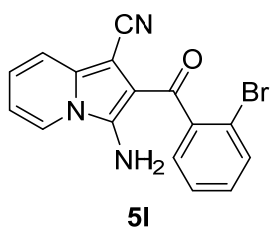

**<sup>13</sup>C{<sup>1</sup>H} NMR spectrum of 5I (100 MHz, CDCl<sub>3</sub>)**

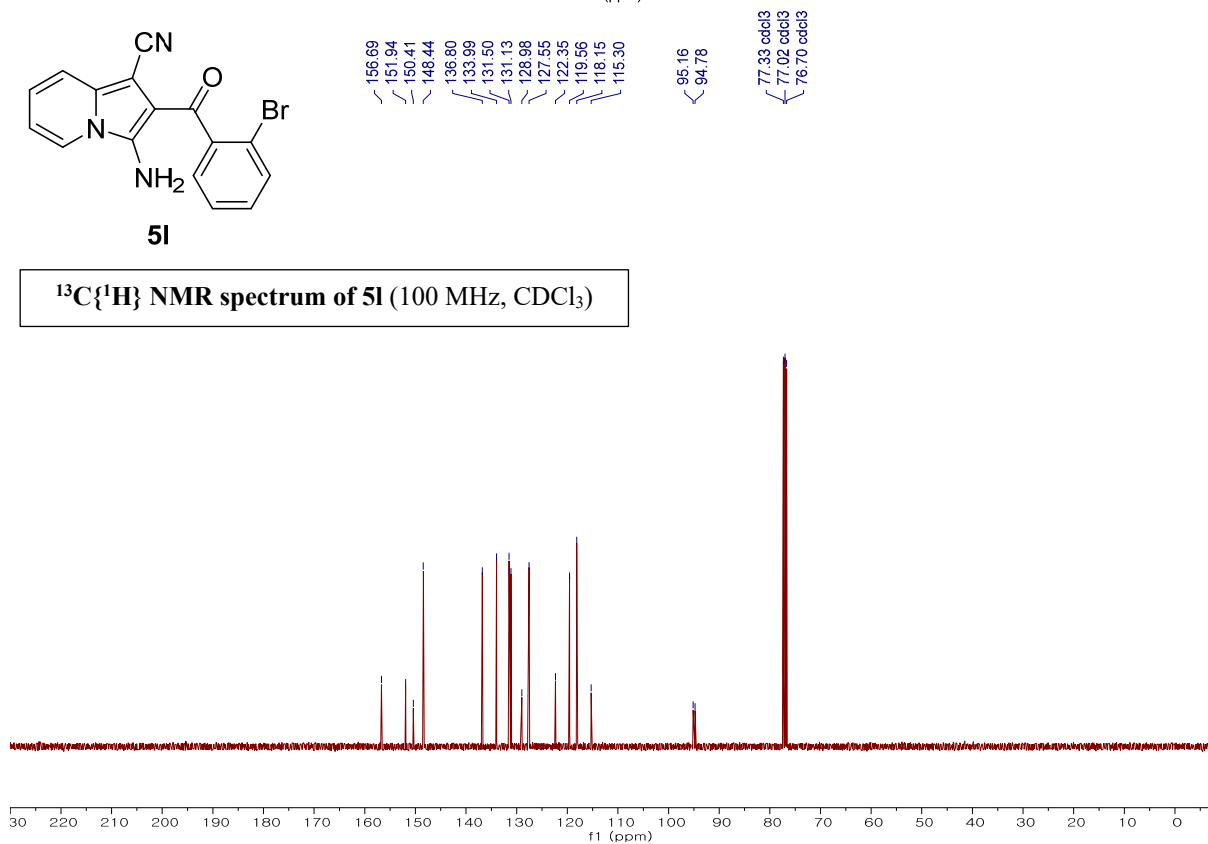

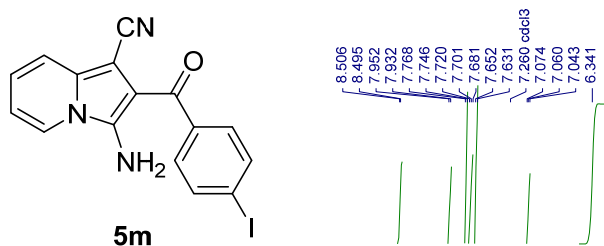

$^1\text{H}$  NMR spectrum of 5m (400 MHz,  $\text{CDCl}_3$ )

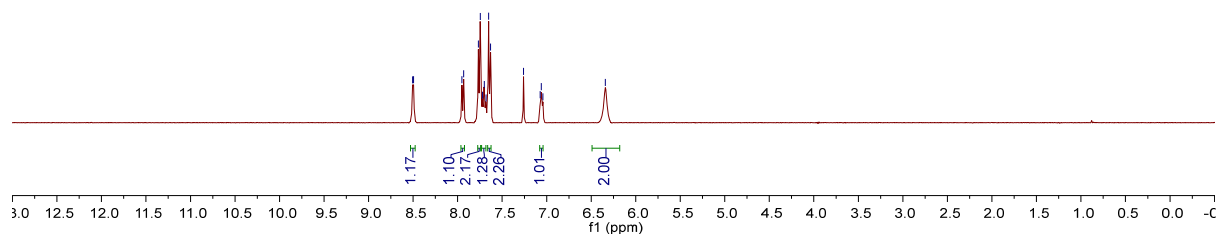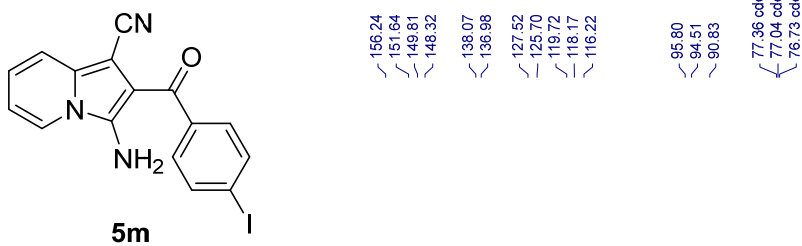

$^{13}\text{C}\{^1\text{H}\}$  NMR spectrum of 5m (100 MHz,  $\text{CDCl}_3$ )

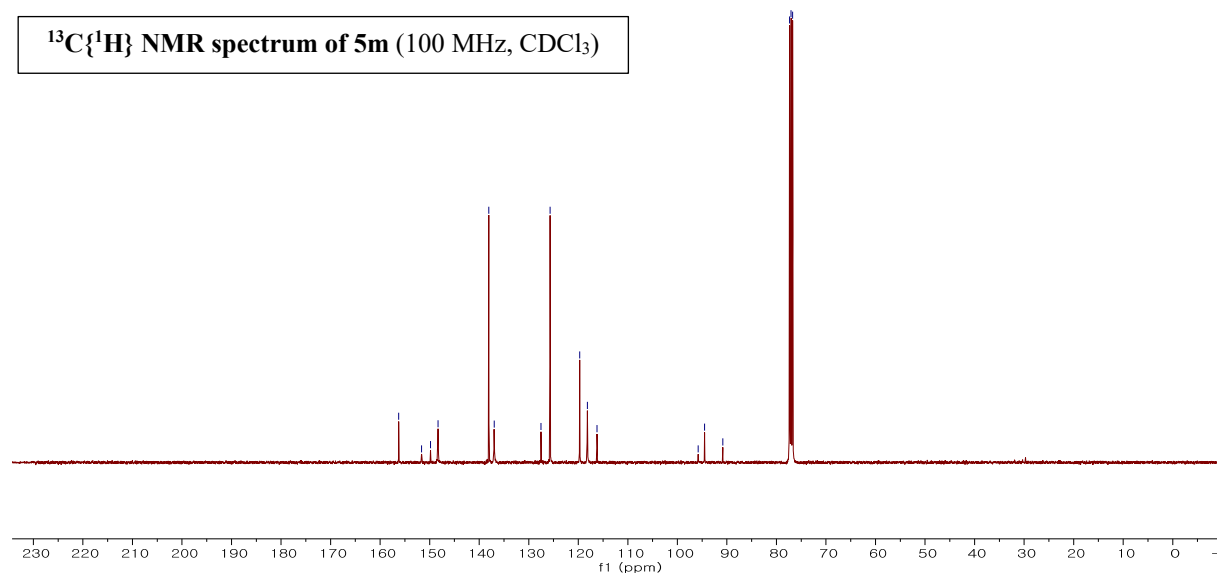

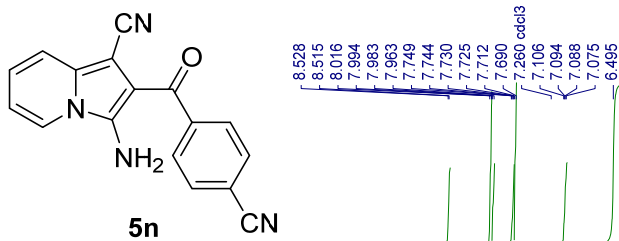

**<sup>1</sup>H NMR spectrum of 5n (400 MHz, CDCl<sub>3</sub>)**

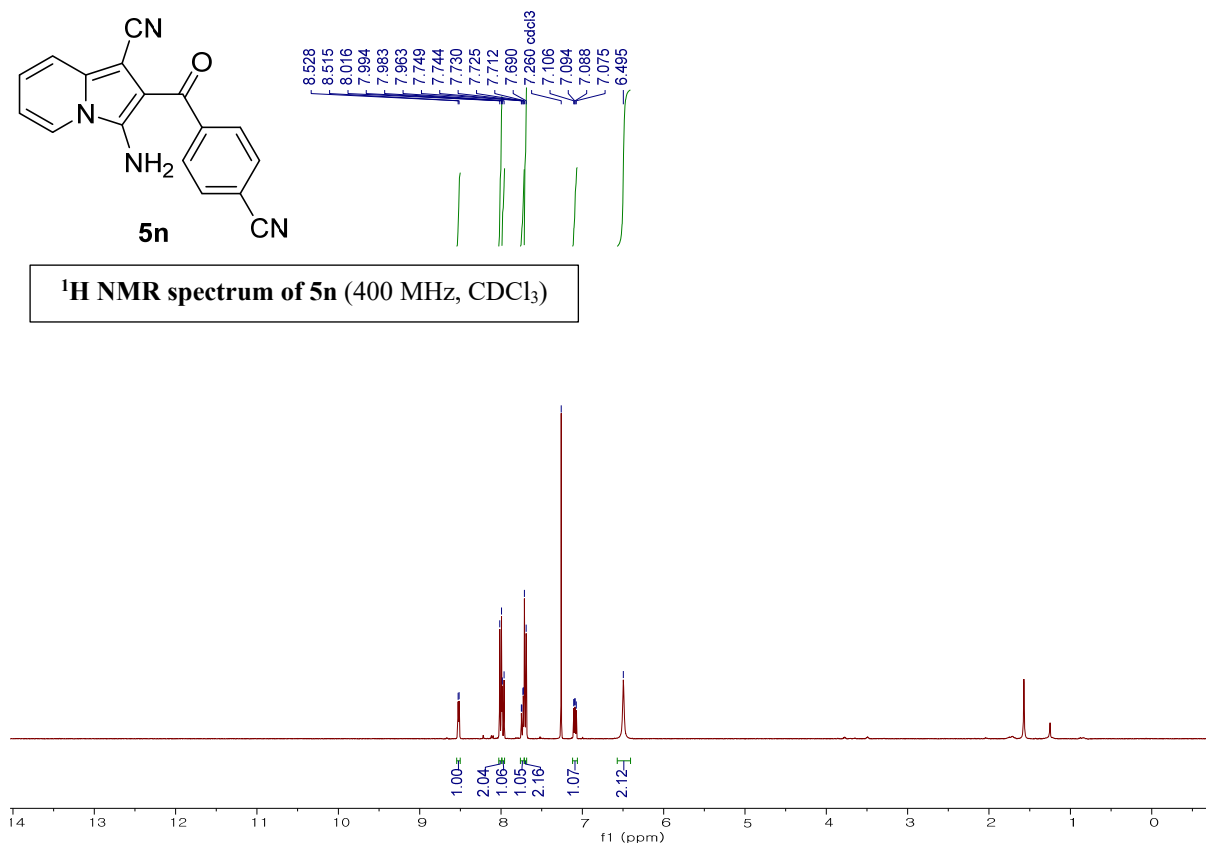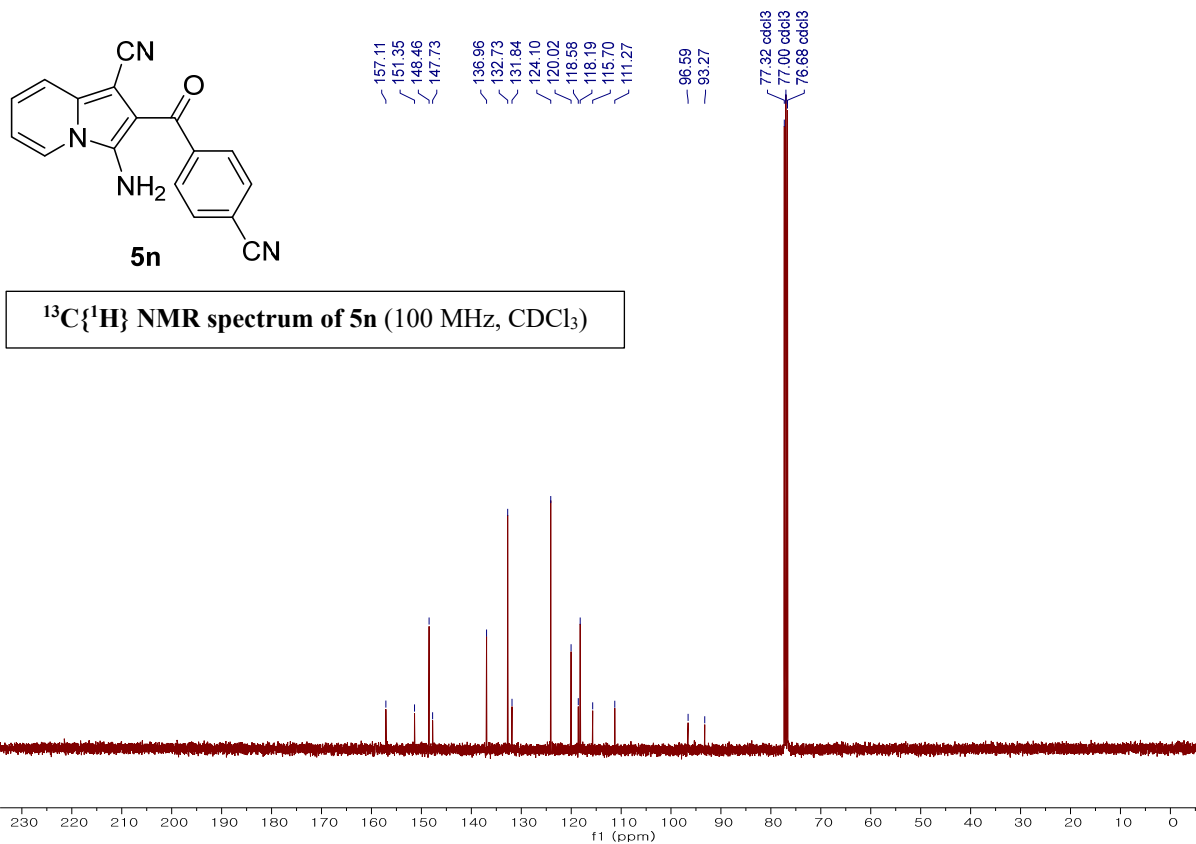

**<sup>13</sup>C{<sup>1</sup>H} NMR spectrum of 5n (100 MHz, CDCl<sub>3</sub>)**

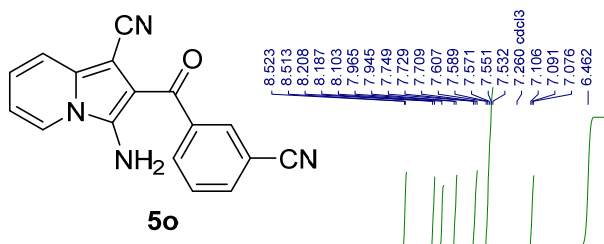

$^1\text{H}$  NMR spectrum of **5o** (400 MHz,  $\text{CDCl}_3$ )

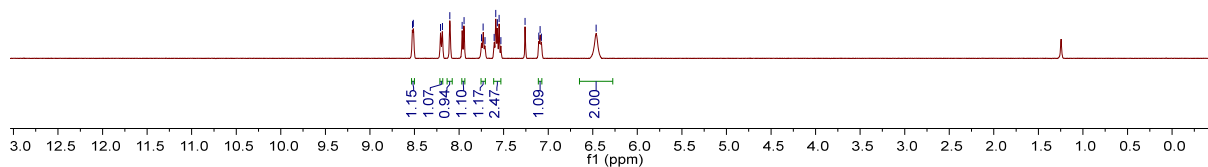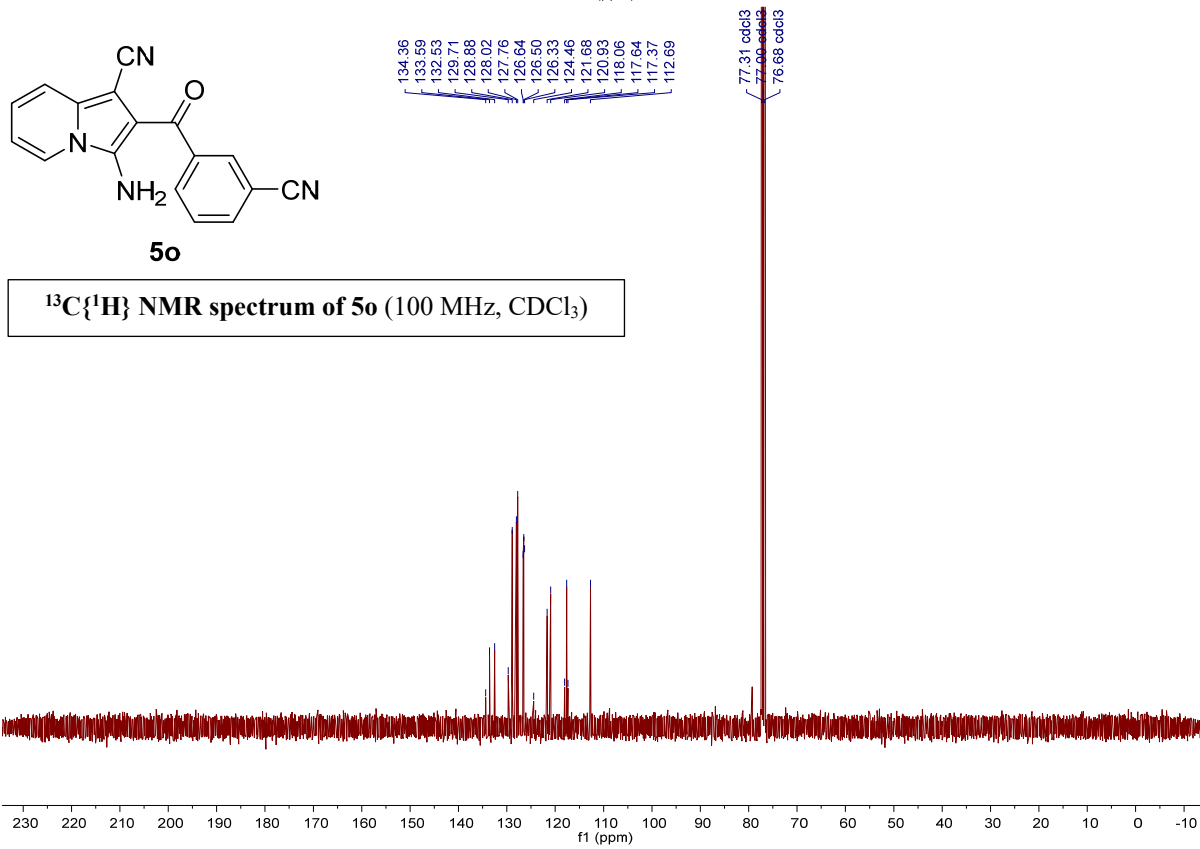

$^{13}\text{C}\{^1\text{H}\}$  NMR spectrum of **5o** (100 MHz,  $\text{CDCl}_3$ )

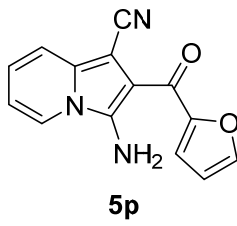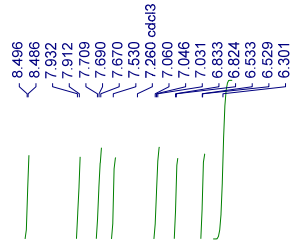

**$^1\text{H}$  NMR spectrum of 5p (400 MHz,  $\text{CDCl}_3$ )**

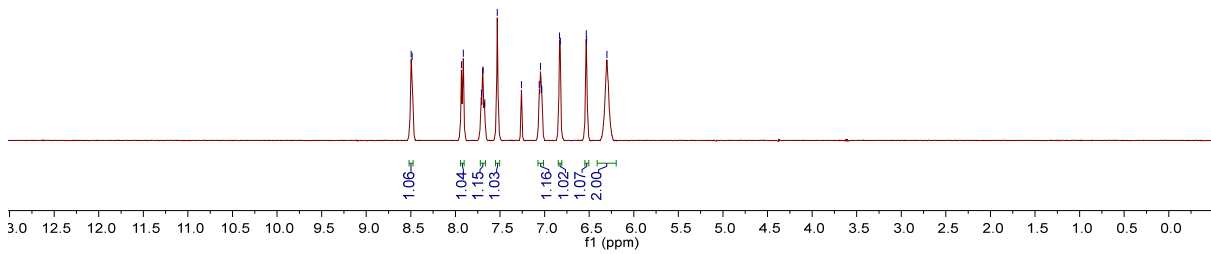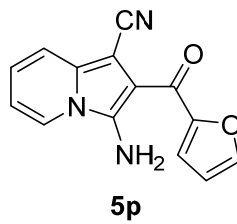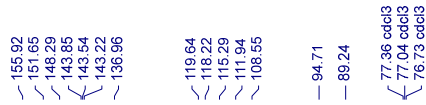

**$^{13}\text{C}\{^1\text{H}\}$  NMR spectrum of 5p (100 MHz,  $\text{CDCl}_3$ )**

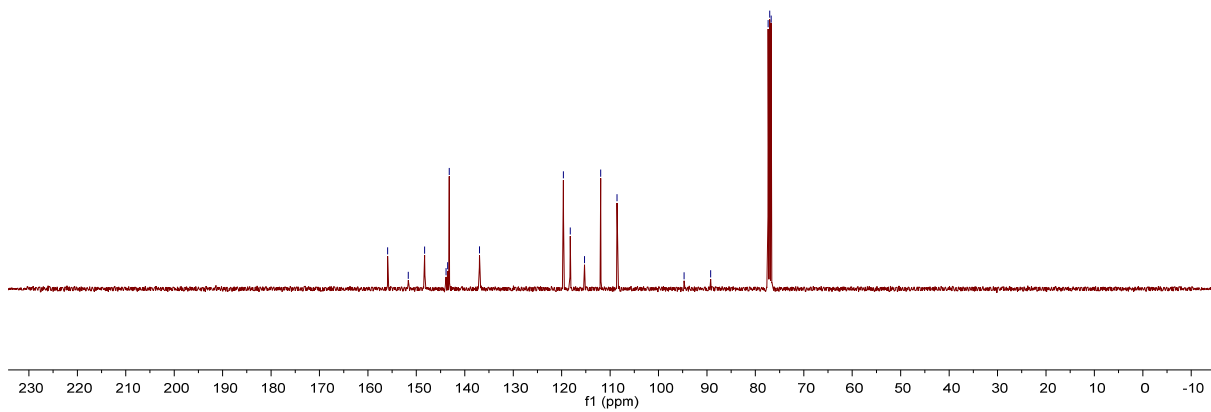

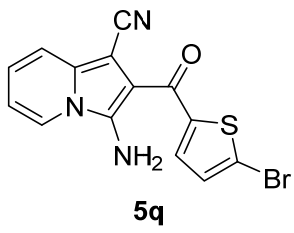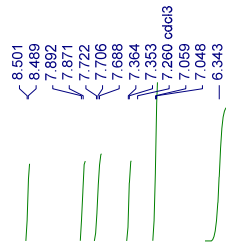

<sup>1</sup>H NMR spectrum of **5q** (400 MHz, CDCl<sub>3</sub>)

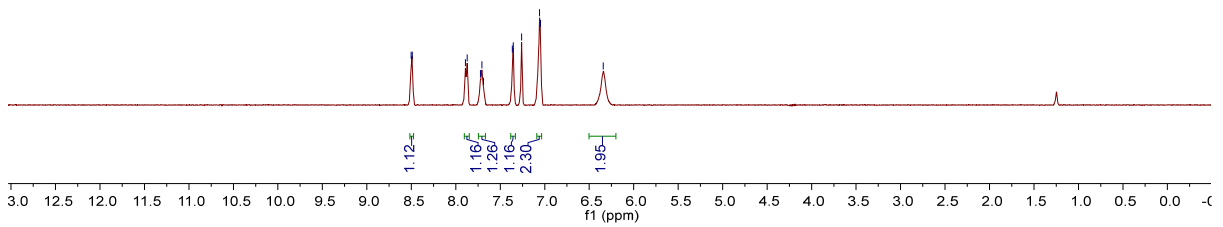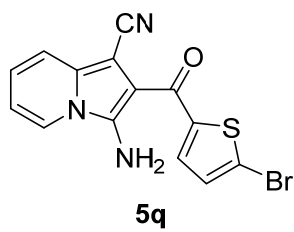

<sup>13</sup>C{<sup>1</sup>H} NMR spectrum of **5q** (100 MHz, CDCl<sub>3</sub>)

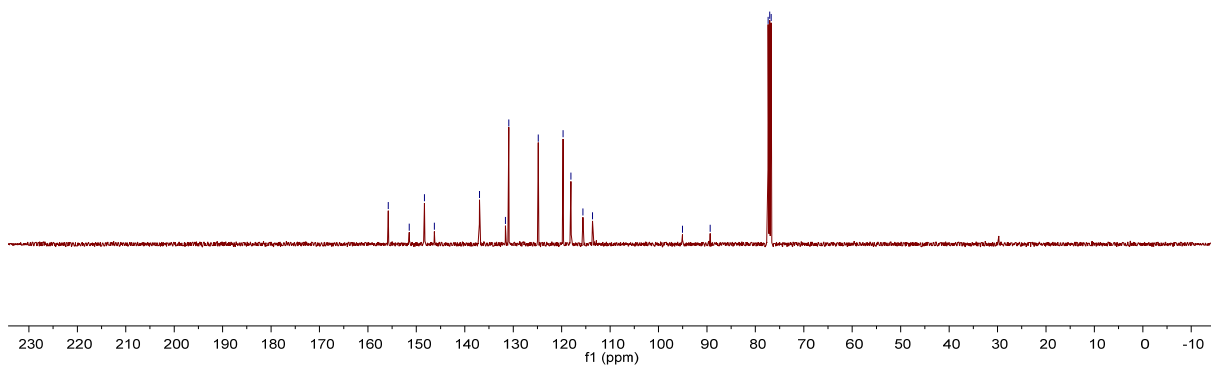

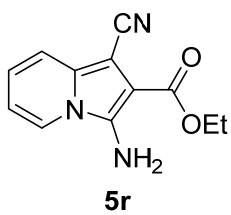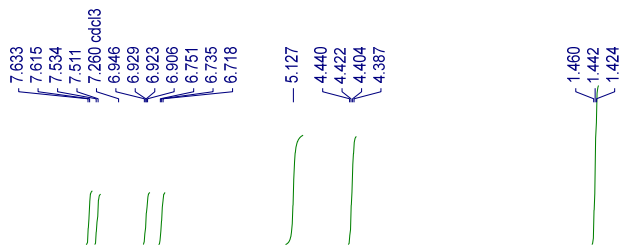

**<sup>1</sup>H NMR spectrum of 5r (400 MHz, CDCl<sub>3</sub>)**

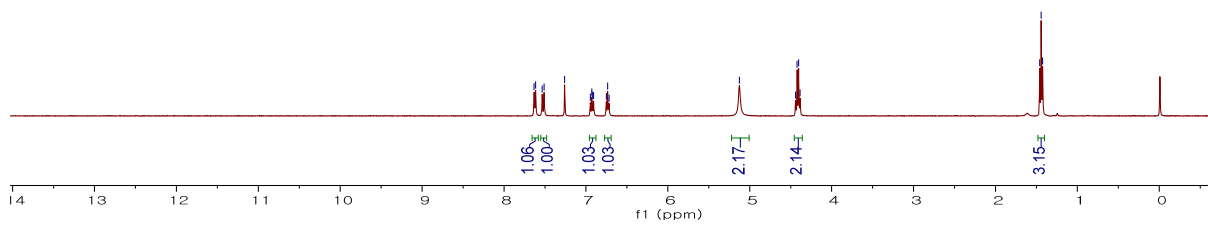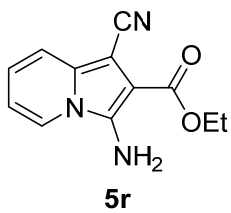

**<sup>13</sup>C{<sup>1</sup>H} NMR spectrum of 5r (100 MHz, CDCl<sub>3</sub>)**

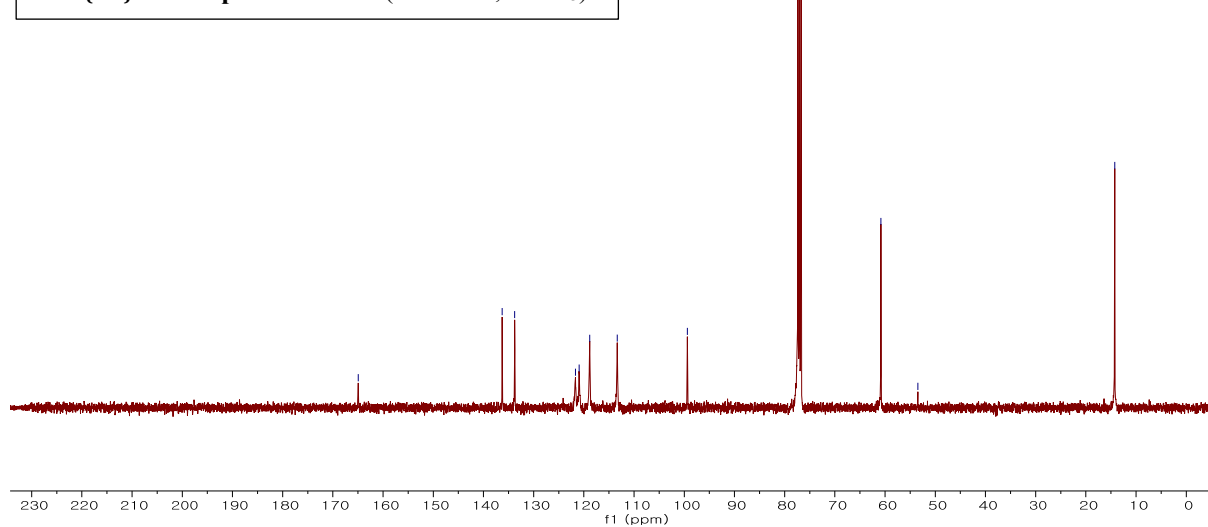



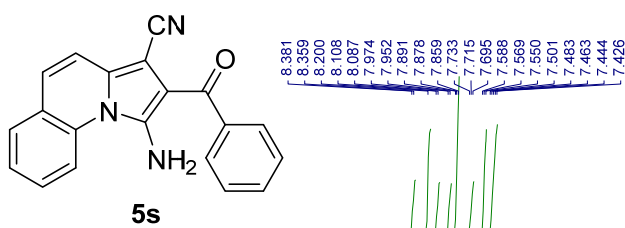

$^1\text{H}$  NMR spectrum of **5s** (400 MHz, DMSO- $d_6$ )

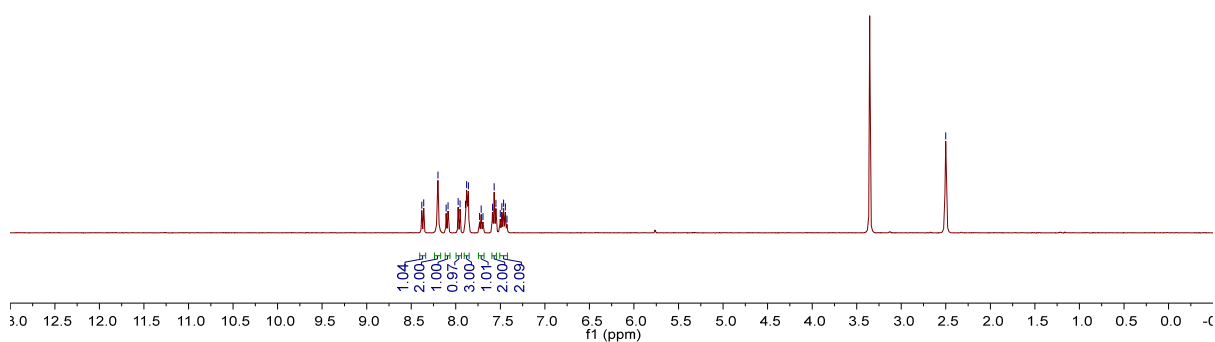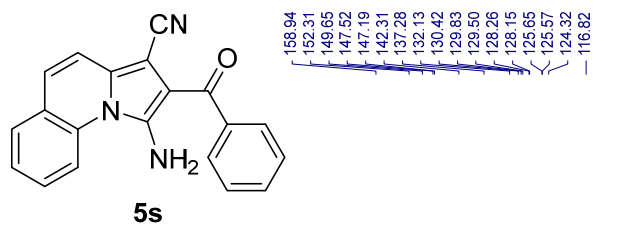

$^{13}\text{C}\{^1\text{H}\}$  NMR spectrum of **5s** (100 MHz, DMSO- $d_6$ )

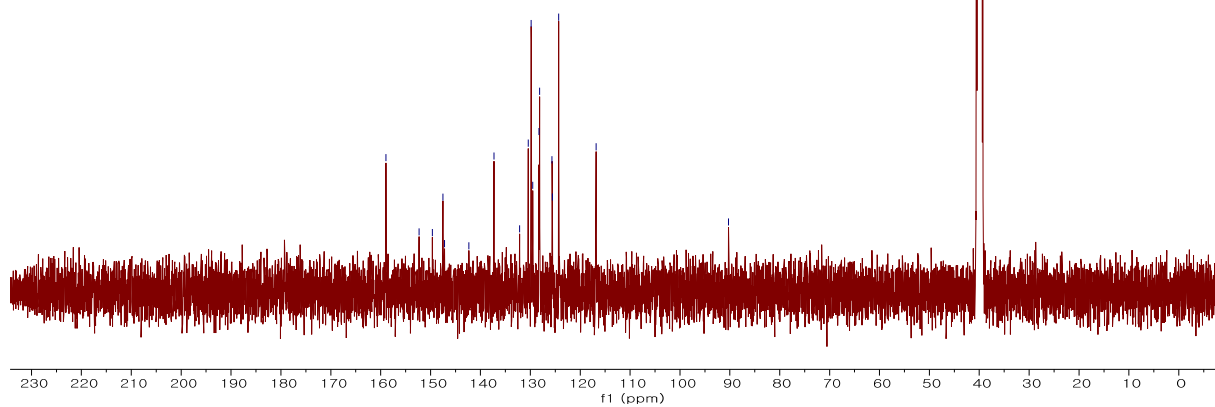



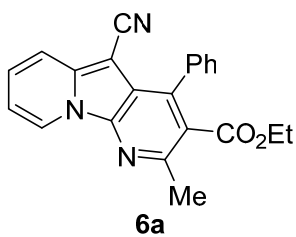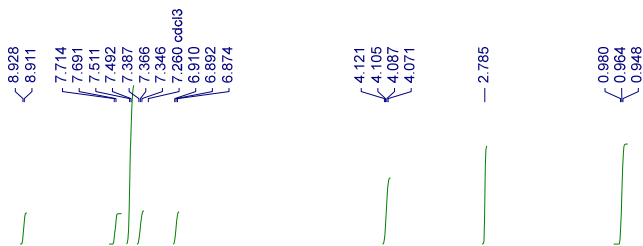

**<sup>1</sup>H NMR spectrum of 6a (400 MHz, CDCl<sub>3</sub>)**

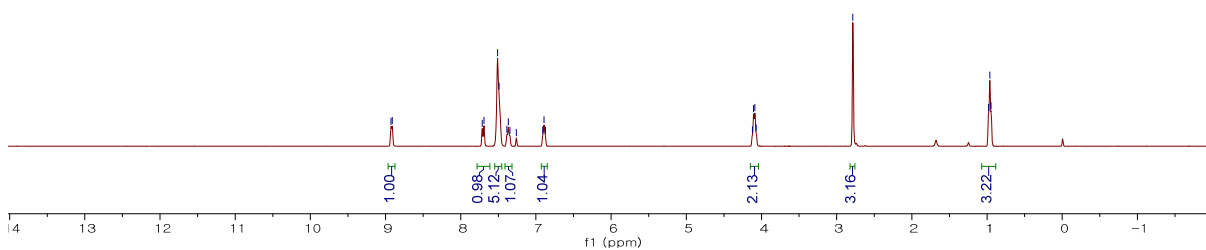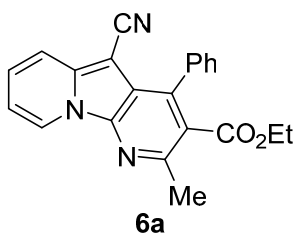

**<sup>13</sup>C{<sup>1</sup>H} NMR spectrum of 6a (100 MHz, CDCl<sub>3</sub>)**

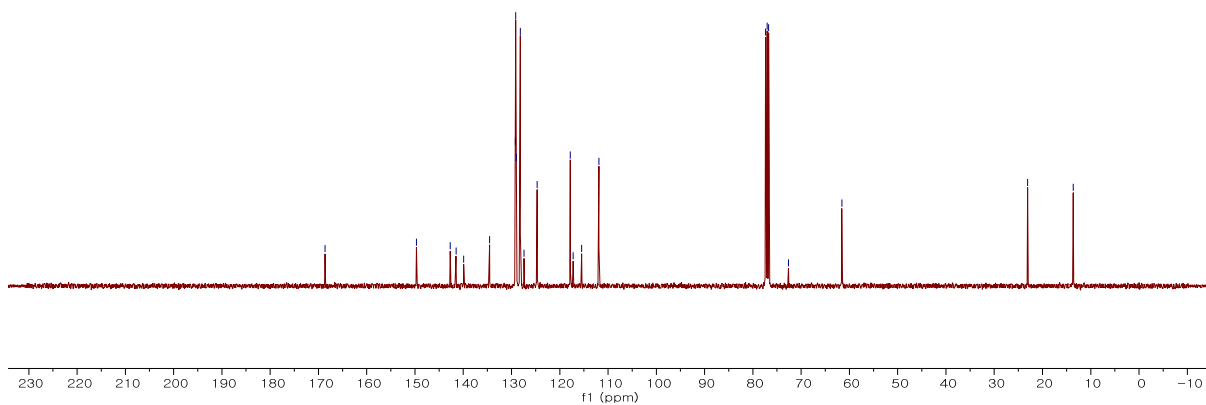

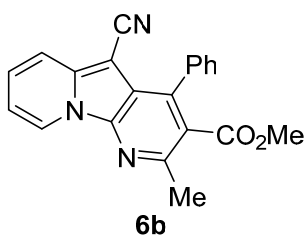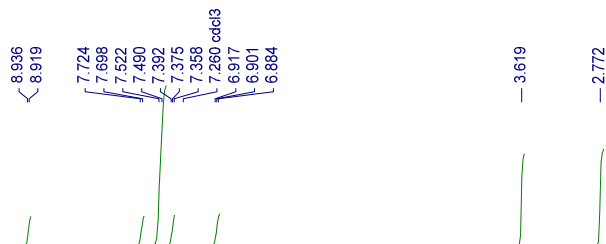

**<sup>1</sup>H NMR spectrum of 6b (400 MHz, CDCl<sub>3</sub>)**

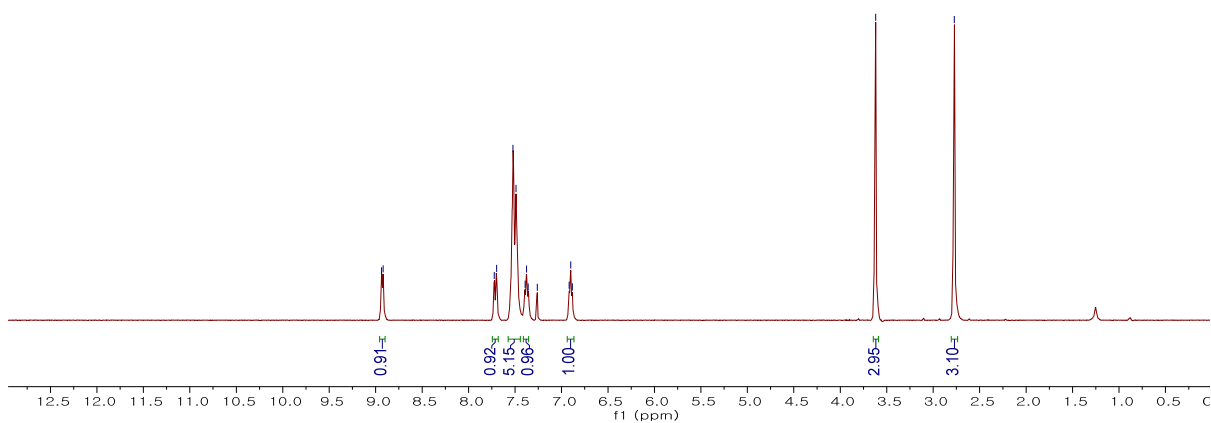

**<sup>13</sup>C{<sup>1</sup>H} NMR spectrum of 6b (100 MHz, CDCl<sub>3</sub>)**

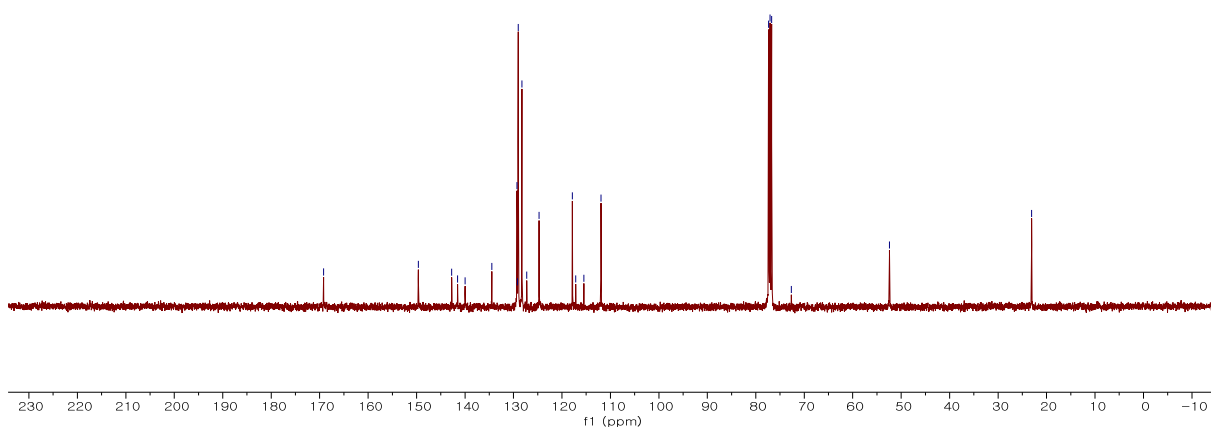

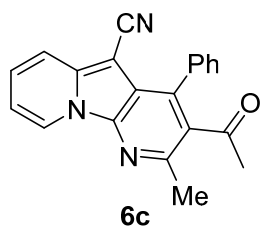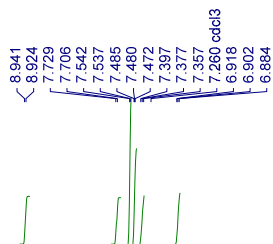

**<sup>1</sup>H NMR spectrum of 6c (400 MHz, CDCl<sub>3</sub>)**

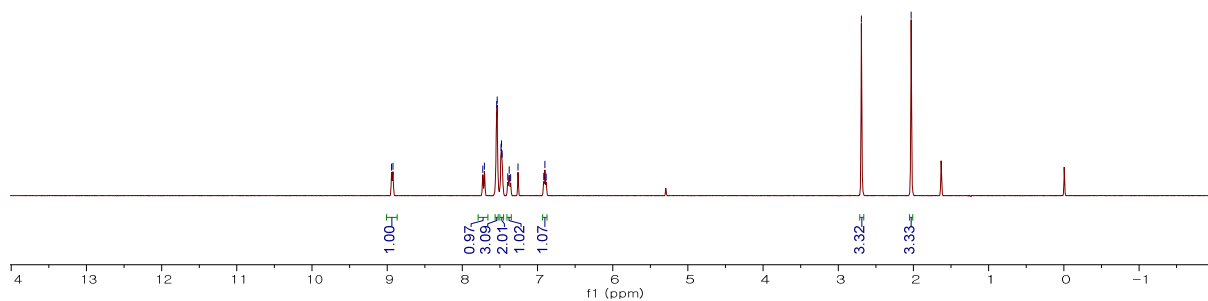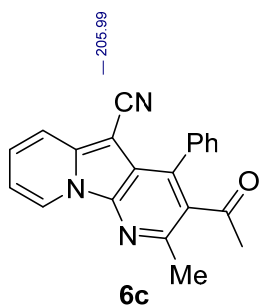

**<sup>13</sup>C{<sup>1</sup>H} NMR spectrum of 6c (100 MHz, CDCl<sub>3</sub>)**

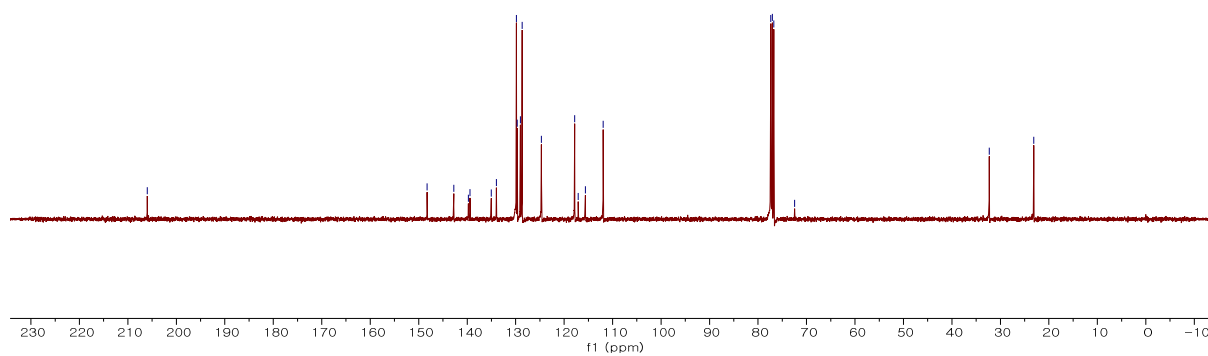

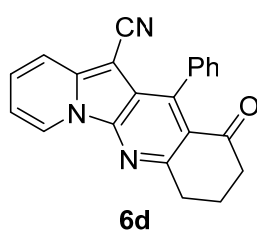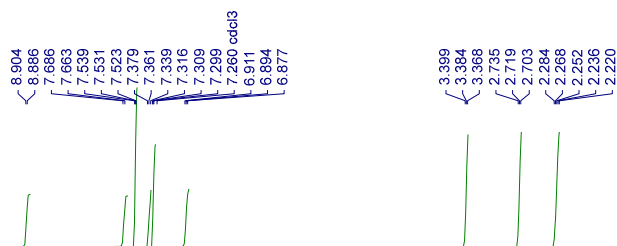

**<sup>1</sup>H NMR spectrum of 6d (400 MHz, CDCl<sub>3</sub>)**

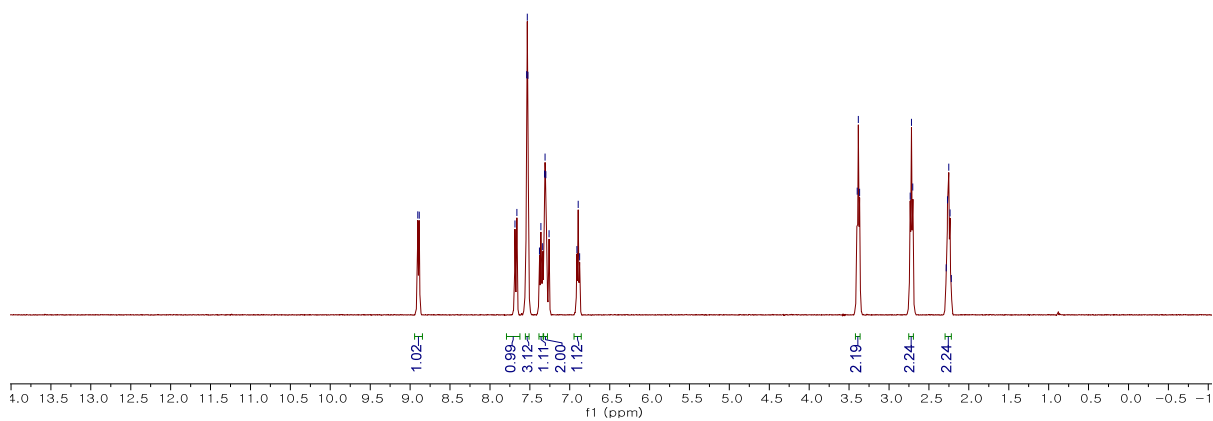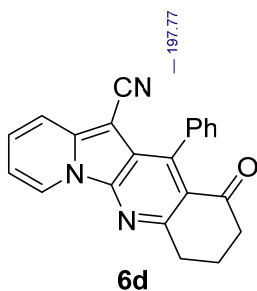

**<sup>13</sup>C{<sup>1</sup>H} NMR spectrum of 6d (100 MHz, CDCl<sub>3</sub>)**

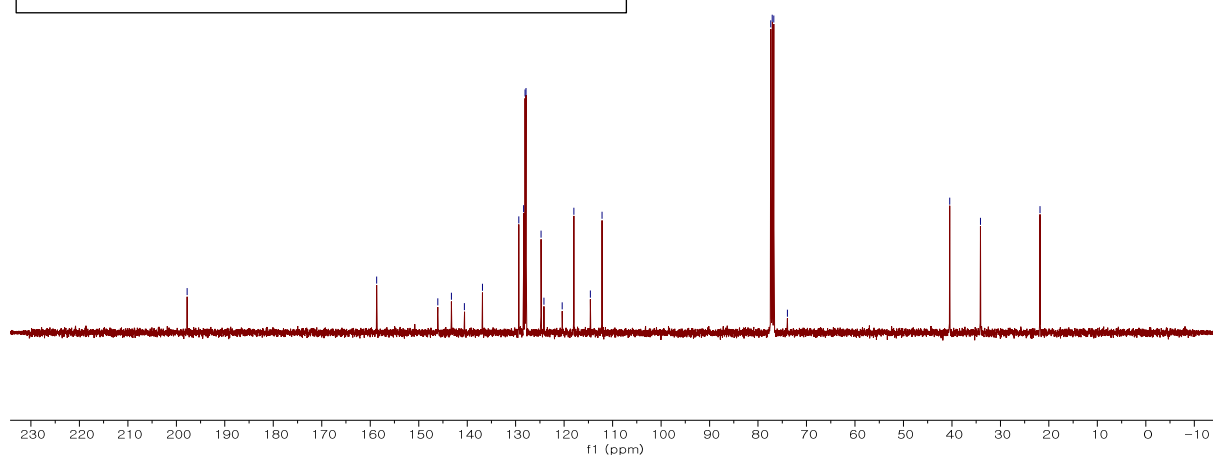

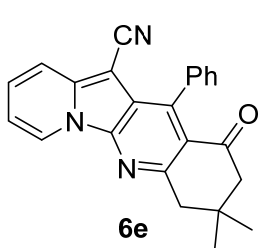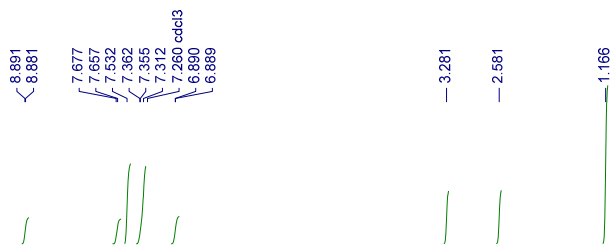

**<sup>1</sup>H NMR spectrum of 6e (400 MHz, CDCl<sub>3</sub>)**

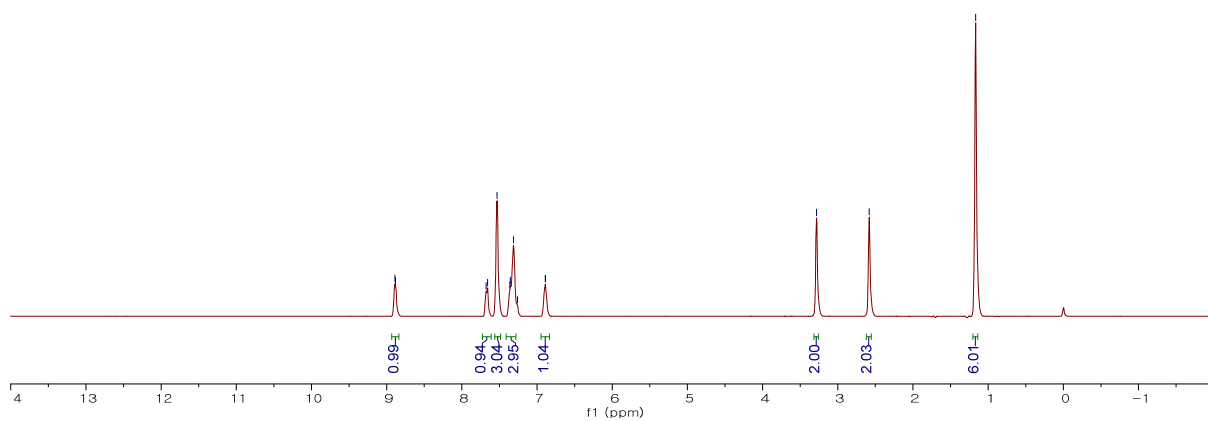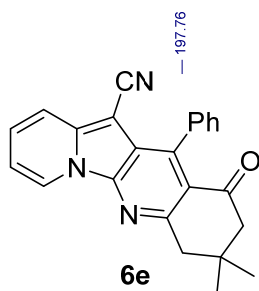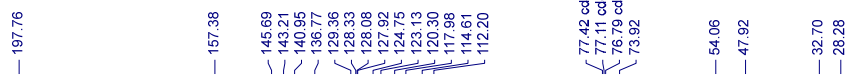

**<sup>13</sup>C{<sup>1</sup>H} NMR spectrum of 6e (100 MHz, CDCl<sub>3</sub>)**

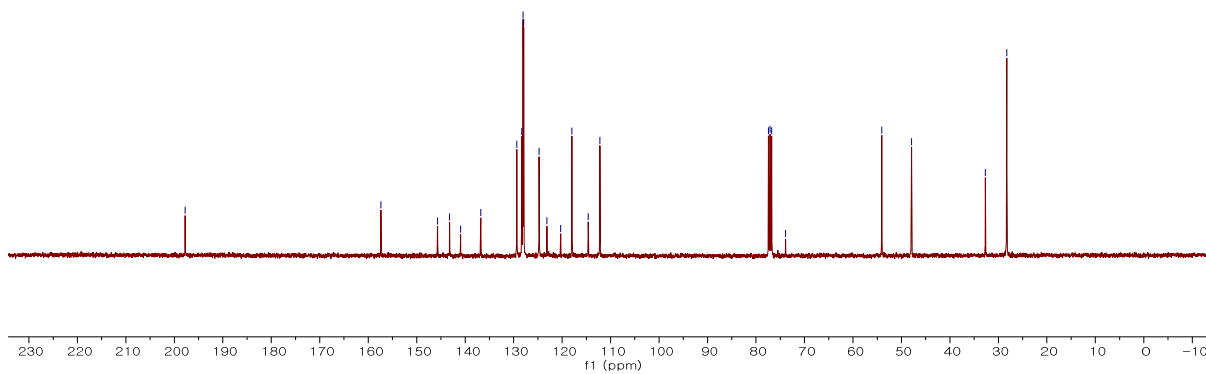

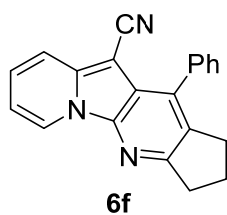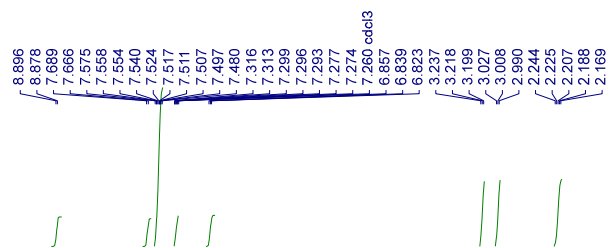

$^1\text{H}$  NMR spectrum of **6f** (400 MHz,  $\text{CDCl}_3$ )

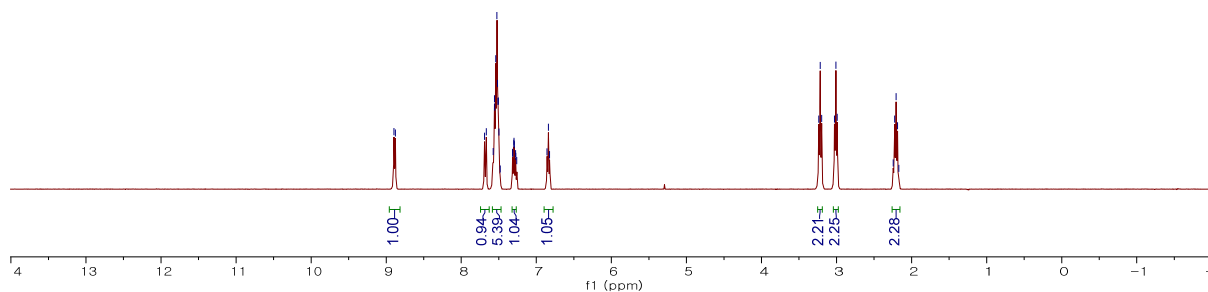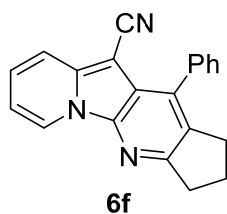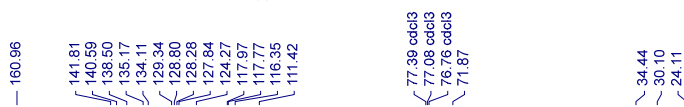

$^{13}\text{C}\{^1\text{H}\}$  NMR spectrum of **6f** (100 MHz,  $\text{CDCl}_3$ )

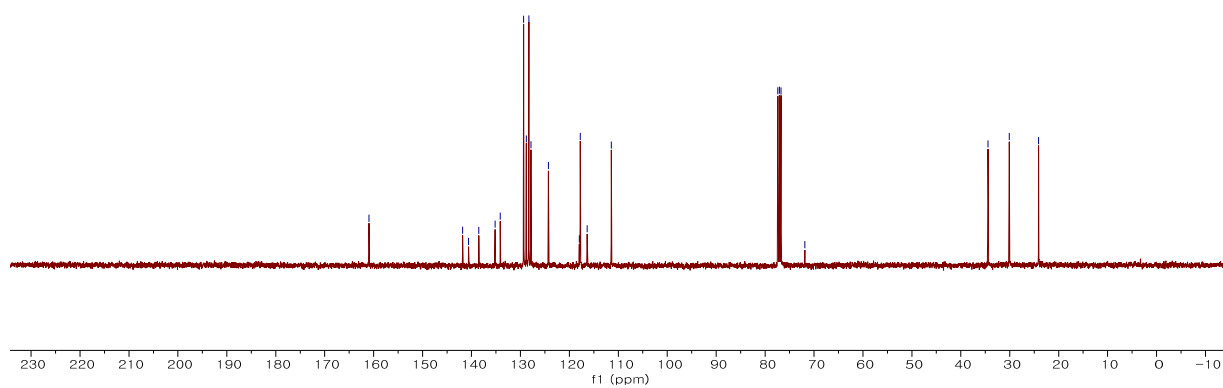



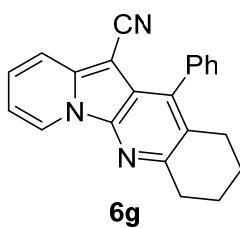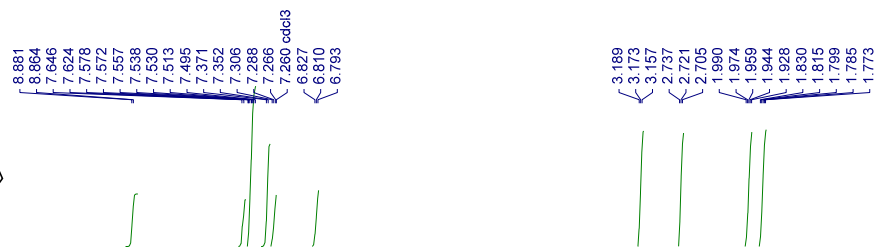

**<sup>1</sup>H NMR spectrum of 6g (400 MHz, CDCl<sub>3</sub>)**

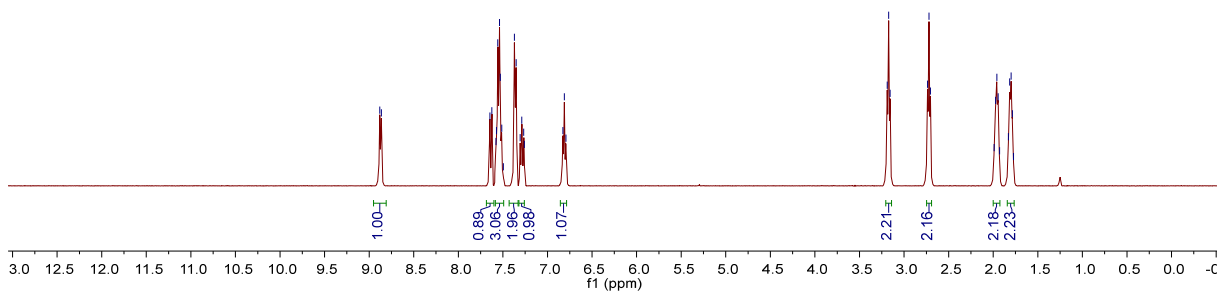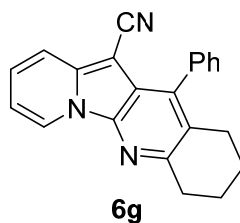

**<sup>13</sup>C{<sup>1</sup>H} NMR spectrum of 6g (100 MHz, CDCl<sub>3</sub>)**

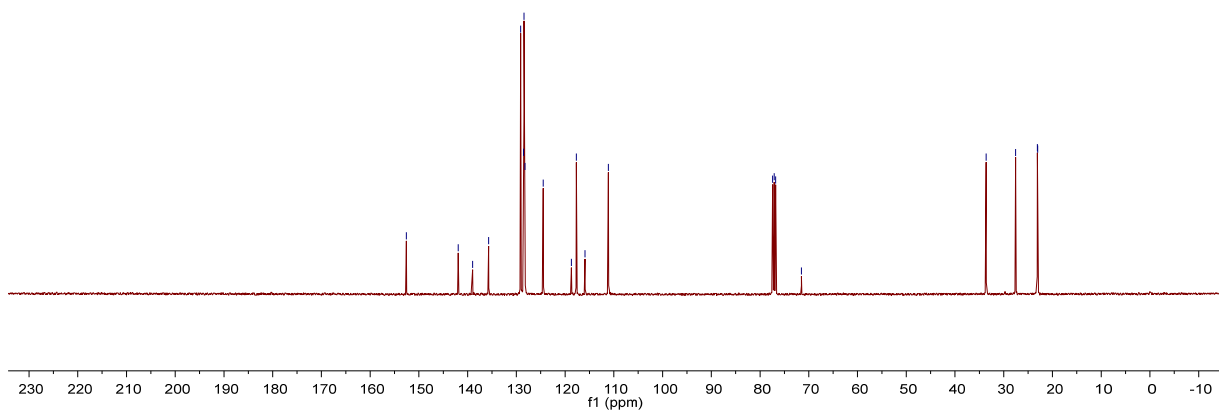

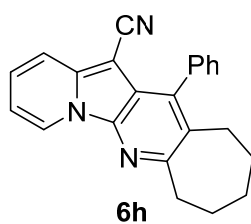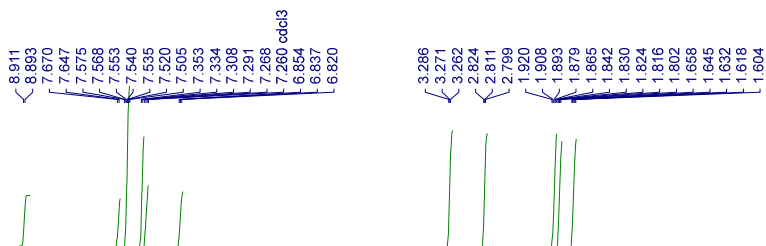

$^1\text{H}$  NMR spectrum of **6h** (400 MHz,  $\text{CDCl}_3$ )

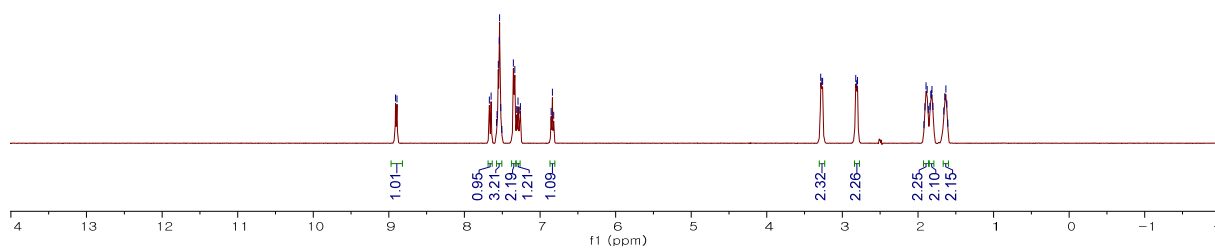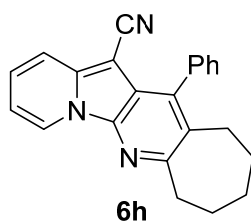

$^{13}\text{C}\{^1\text{H}\}$  NMR spectrum of **6h** (100 MHz,  $\text{CDCl}_3$ )

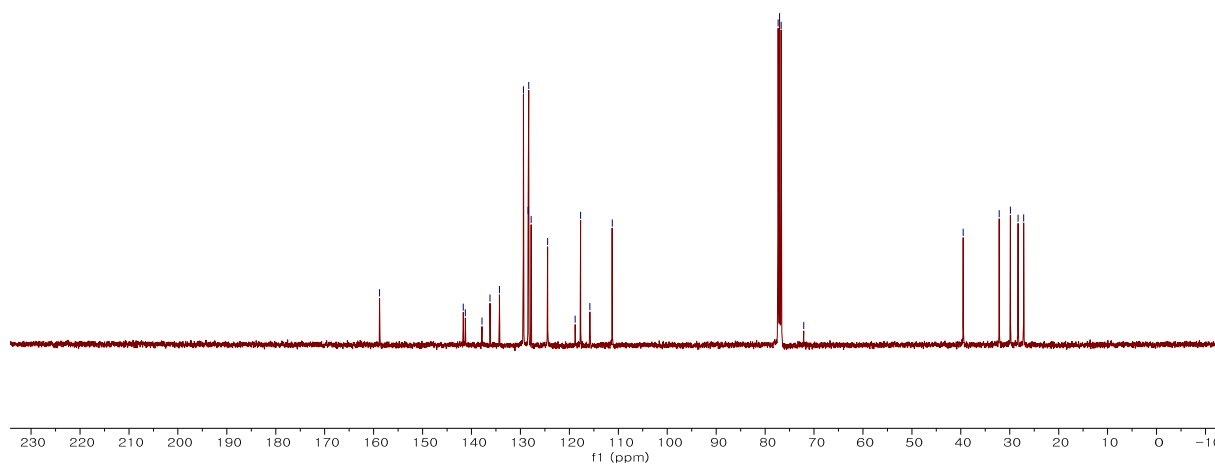

Supplement: d3ob00471f1.pdf [file d3ob00471f1.pdf]
